# Supplementary material for: Regio- and stereoselective electrochemical selenoalkylation of alkynes with 1,3-dicarbonyl compounds and diselenides
Source: Royal Society of Chemistry journal article supplement (doi:10.1039/d2qo00320a), 2022-01-01

## *Supplementary Information*

# **Regio- and stereo-selective electrochemical selenoalkylation of alkynes with 1,3-dicarbonyl compounds and diselenides**

Zhong-Wei Hou,<sup>a</sup> Laiqiang Li,<sup>a</sup> and Lei Wang<sup>\*,a,b</sup>

<sup>a</sup>Advanced Research Institute and Department of Chemistry, Taizhou University, Jiaojiang, Zhejiang, 318000, P. R. China, E-mail: leiwang88@hotmail.com

<sup>b</sup>State Key Laboratory of Organometallic Chemistry, Shanghai Institute of Organic Chemistry, Chinese Academy of Sciences, Shanghai, 200032, P. R. China

| <b>Contents</b>                                           | <b>Page</b> |
|-----------------------------------------------------------|-------------|
| <b>1. General Information</b>                             | <b>S2</b>   |
| <b>2. General Procedure for the Electrolysis</b>          | <b>S2</b>   |
| <b>3. Cyclic Voltammetry Studies</b>                      | <b>S3</b>   |
| <b>4. Optimization of the Electrode Materials</b>         | <b>S4</b>   |
| <b>5. Unsuccessful Substrates</b>                         | <b>S5</b>   |
| <b>6. Characterization Data for Electrolysis Products</b> | <b>S6</b>   |
| <b>7. Synthesis and Characterization of Substrates</b>    | <b>S21</b>  |
| <b>8. X-Ray Crystallography</b>                           | <b>S22</b>  |
| <b>9. NMR Spectra for Compounds</b>                       | <b>S24</b>  |

## 1. General Information

Unless otherwise noted, chemicals and materials were purchased from commercial suppliers and used without further purification. All the solvents were treated according to the general methods. Flash column chromatography was performed with silica gel (200–300 mesh). NMR spectra were recorded on a 400 MHz Bruker FT-NMR spectrometer. Data were reported as chemical shifts in ppm relative to TMS (0.00 ppm) for  $^1\text{H}$  NMR and  $\text{CDCl}_3$  (77.2 ppm) for  $^{13}\text{C}$  NMR. The abbreviations used for explaining the multiplicities were as follows: s = singlet, d = doublet, t = triplet, q = quartet, m = multiplet. High resolution mass spectra (ESI HRMS) were recorded on an Agilent Technologies 6540 UHD Accurate-Mass Q-TOF LC/MS (ESI).

## 2. General Procedure for the Electrolysis

**General Procedure for the Model Reaction:** A 20 mL three-necked beaker-type cell (Figure S1A) was charged with alkyne (0.20 mmol, 1.0 equiv.), diselenide (0.15 mmol, 0.75 equiv.), dimethyl 2-fluoromalonate (0.40 mmol, 2.0 equiv.),  $\text{Cp}_2\text{Fe}$  (5 mol%),  $\text{Na}_2\text{CO}_3$  (0.10 mmol, 0.5 equiv.) and  $n\text{-Bu}_4\text{NBF}_4$  (0.10 mmol, 0.5 equiv.). The cell was equipped with a reticulated vitreous carbon (RVC, 100 PPI, 1.2 cm x 0.8 cm x 0.8 cm) anode and a platinum plate (1 cm x 1 cm x 0.1 mm) cathode (Figure S1B), MeOH (5.0 mL) and THF (2.0 mL) were added. The electrolysis was carried out at 65 °C (oil bath temperature) using a constant current of 10 mA for 2.5 h. The reaction mixture was concentrated under reduced pressure and the residue was chromatographed through silica gel eluting with ethyl acetate/petroleum ether to give the desired product.

### General Procedure for the Gram-Scale Synthesis of 4

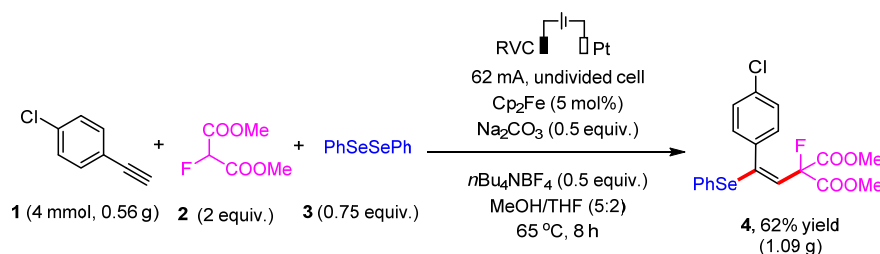

The gram-scale electrosynthesis of **4** was conducted in a 100 mL three-necked round-bottomed flask (Figure S1C) with a piece of RVC (2.0 cm x 2.0 cm x 1.2 cm) as the anode, a Pt plate as the cathode (1.5 cm x 1.5 cm x 0.3 mm), and a constant current of 62 mA for 8.0 h at 65 °C. The reaction mixture consisted 4-chlorophenylacetylene (0.56 g, 4.0 mmol, 1.0 equiv.), diselenide (0.94 g, 3.0 mmol, 0.75 equiv.), dimethyl 2-fluoromalonate (1.20 g, 8.0 mmol, 2.0 equiv.),  $\text{Cp}_2\text{Fe}$  (37 mg, 5 mol%),  $\text{Na}_2\text{CO}_3$  (0.21 g, 2.0 mmol, 0.5 equiv.) and  $n\text{-Bu}_4\text{NBF}_4$  (0.66 g, 2.0 mmol, 0.5 equiv.), MeOH (60 mL) and THF (24 mL). When the reaction was complete, the reaction mixture was concentrated under reduced pressure and the residue was chromatographed through silica gel eluting with ethyl acetate/petroleum ether to give the desired product **4** (1.09 g, 62% yield).

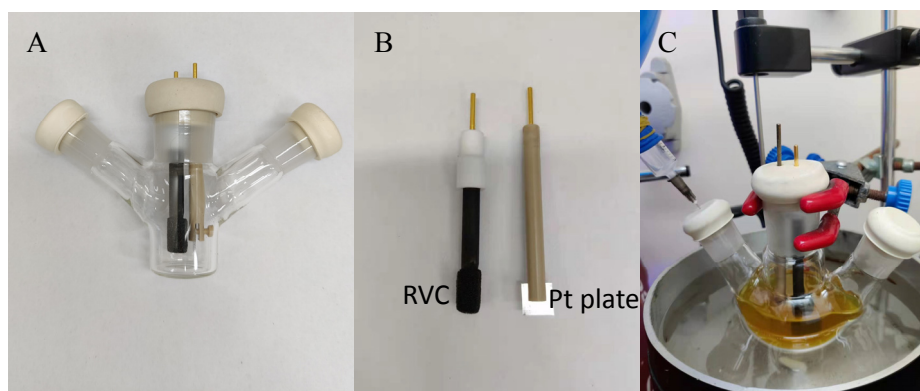

**Figure S1.** The electrolysis setup.

### 3. Cyclic Voltammetry Studies

The cyclic voltammograms were recorded in an electrolyte of  $n\text{-Bu}_4\text{NBF}_4$  (0.1 M) in MeOH/THF (2:1, 5.0 mL) using a glassy carbon disk working electrode (diameter, 3 mm), a Pt wire auxiliary electrode and an Ag/AgCl reference electrode. The scan rate was 100 mV/s.

We have previously reported the cyclic voltammetry experiments to demonstrate the role of ferrocene in the electrochemical generation of 1,3-dicarbonyl radicals [Ref.: *Org. Lett.*, 2021, **23**, 8585–8589]. In this study, we tested cyclic voltammograms (CVs) of 1-chloro-4-ethynylbenzene (**1**) and diphenyldiselenide (**3**) (Figure S2 and S3). These results suggested that effective electron transfer occurred between  $\text{Cp}_2\text{Fe}^+$  produced through anodic oxidation of  $\text{Cp}_2\text{Fe}$  ( $E_{p/2} = 0.46$  V vs. Ag/AgCl) and the conjugate base ( $E_{p/2} = 0.45$  V vs. Ag/AgCl) of **2** instead of **2** ( $E_{p/2} = 1.21$  V vs. Ag/AgCl), **1** ( $E_{p/2} = 1.43$  V vs. Ag/AgCl) and **3** ( $E_{p/2} = 1.49$  V vs. Ag/AgCl).  $\text{Cp}_2\text{Fe}$  acts as a redox catalyst in the electrochemical process with the assistance of a base.

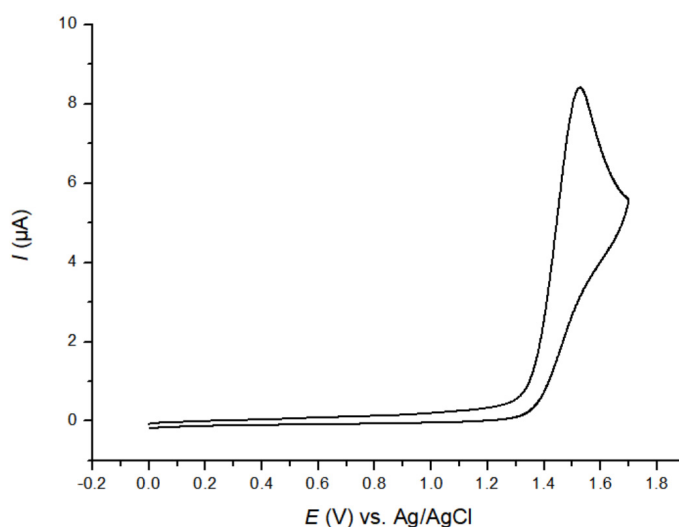

**Figure S2.** Cyclic voltammogram of 1-chloro-4-ethynylbenzene (**1**, 10 mM) in an electrolyte of  $n\text{-Bu}_4\text{NBF}_4$  (0.1 M) in MeOH/THF (2:1, 5 mL).  $E_{p/2} = 1.43$  V.

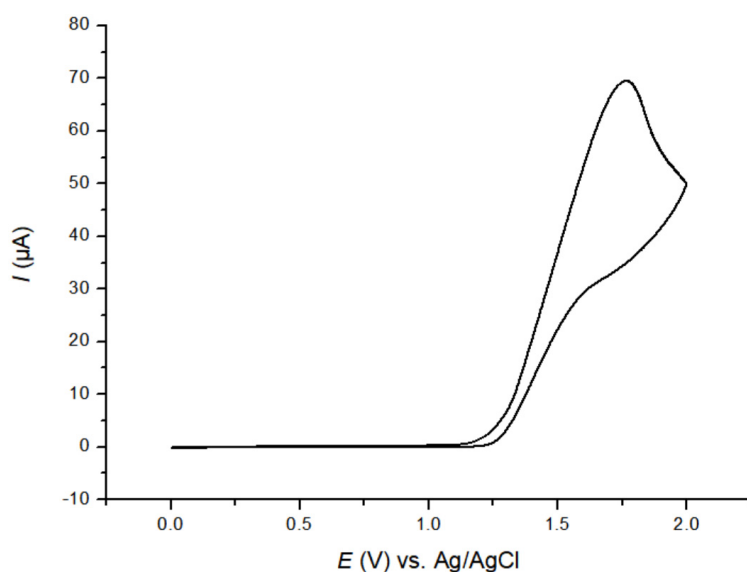

**Figure S3.** Cyclic voltammogram of diphenyldiselenide (**3**, 10 mM) in an electrolyte of *n*-Bu<sub>4</sub>NBF<sub>4</sub> (0.1 M) in MeOH/THF (2:1, 5 mL).  $E_{p/2} = 1.49$  V.

#### 4. Optimization of the Electrode Materials

**Table S1** Optimization of the electrode combinations<sup>a</sup>

| Entry | Electrode materials   | Yield of <b>4</b> <sup>b</sup> |
|-------|-----------------------|--------------------------------|
| 1     | graphite rod(+)/Pt(-) | 46                             |
| 2     | Pt(+)/Pt(-)           | 32                             |
| 3     | Pt(+)/RVC(-)          | 18                             |
| 4     | RVC(+)/Ni(-)          | 39                             |
| 5     | RVC(+)/Zn(-)          | Trace                          |
| 6     | RVC(+)/Fe(-)          | 35                             |

<sup>a</sup>Reaction condition: undivided cell, **1** (0.20 mmol), **2** (0.40 mmol), **3** (0.15 mmol), Cp<sub>2</sub>Fe (5 mol%), Na<sub>2</sub>CO<sub>3</sub> (0.10 mmol), *n*-Bu<sub>4</sub>NBF<sub>4</sub> (0.10 mmol), MeOH/THF (5.0 mL/2.0 mL), 65 °C, 10 mA, 2.5 h (4.6 F·mol<sup>-1</sup>). <sup>b</sup>Yield determined by <sup>1</sup>H NMR analysis of the crude reaction mixture using coumarin as the internal standard.

## 5. Unsuccessful Substrates

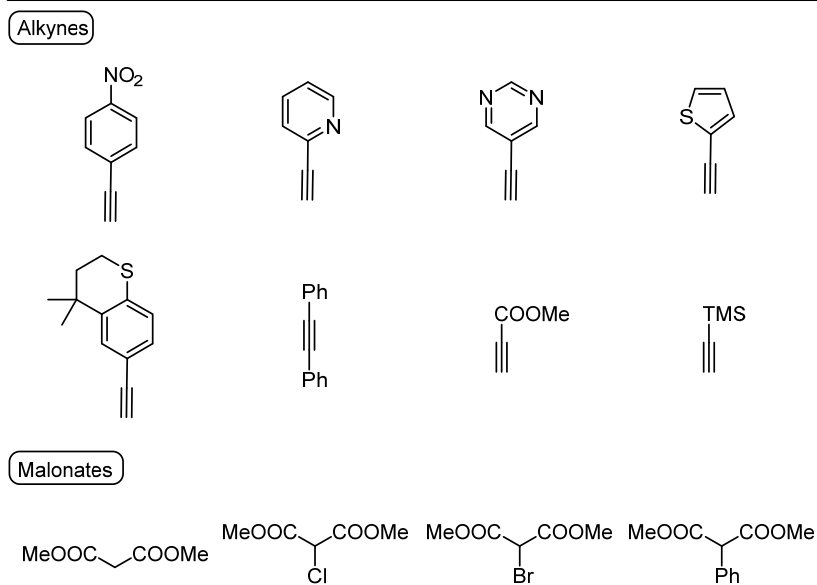

Figure S4. Unsuccessful substrates

## 6. Characterization Data for the Electrolysis Products

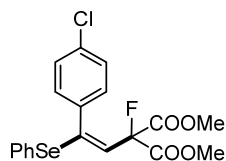

**Dimethyl (*E*)-2-(2-(4-chlorophenyl)-2-(phenylselanyl)vinyl)-2-fluoromalonate (4).** Yield = 78%; White solid; m.p. = 118.8–120.3 °C;  $^1\text{H}$  NMR (400 MHz,  $\text{CDCl}_3$ )  $\delta$  7.56–7.51 (m, 2H), 7.35–7.28 (m, 3H), 7.25–7.19 (m, 4H), 6.09 (d,  $J = 10.6$  Hz, 1H), 3.60 (s, 6H);  $^{13}\text{C}$  NMR (101 MHz,  $\text{CDCl}_3$ )  $\delta$  165.6 (d,  $J_{\text{C-F}} = 27.1$  Hz), 146.4 (d,  $J_{\text{C-F}} = 6.7$  Hz), 136.2, 135.1, 134.9, 130.6 (d,  $J_{\text{C-F}} = 3.1$  Hz), 129.7, 129.3, 128.1, 127.9, 120.3 (d,  $J_{\text{C-F}} = 17.6$  Hz), 91.3 (d,  $J_{\text{C-F}} = 200.7$  Hz), 53.6;  $^{19}\text{F}$  NMR (377 MHz,  $\text{CDCl}_3$ )  $\delta$  -140.7 (d,  $J = 10.6$  Hz); ESI HRMS  $m/z$  ( $\text{M}+\text{Na}$ ) $^+$  calcd 464.9779, obsd 464.9778.

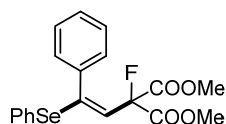

**Dimethyl (*E*)-2-fluoro-2-(2-phenyl-2-(phenylselanyl)vinyl)malonate (5).** Yield = 75%; White solid; m.p. = 54.8–56.9 °C;  $^1\text{H}$  NMR (400 MHz,  $\text{CDCl}_3$ )  $\delta$  7.59–7.54 (m, 2H), 7.35–7.25 (m, 8H), 6.03 (d,  $J = 9.4$  Hz, 1H), 3.54 (s, 6H);  $^{13}\text{C}$  NMR (101 MHz,  $\text{CDCl}_3$ )  $\delta$  165.8 (d,  $J_{\text{C-F}} = 27.5$  Hz), 148.4 (d,  $J_{\text{C-F}} = 7.6$  Hz), 136.5, 136.3, 129.6, 129.3 (d,  $J_{\text{C-F}} = 3.0$  Hz), 129.2, 129.0, 128.1, 127.9, 119.4 (d,  $J_{\text{C-F}} = 17.8$  Hz), 91.2 (d,  $J_{\text{C-F}} = 199.6$  Hz), 53.5;  $^{19}\text{F}$  NMR (377 MHz,  $\text{CDCl}_3$ )  $\delta$  -138.1 (d,  $J = 9.4$  Hz); ESI HRMS  $m/z$  ( $\text{M}+\text{Na}$ ) $^+$  calcd 431.0168, obsd 431.0174.

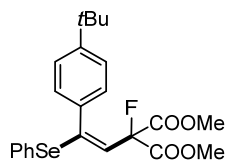

**Dimethyl (*E*)-2-(2-(4-(*tert*-butyl)phenyl)-2-(phenylselanyl)vinyl)-2-fluoromalonate (6).** Yield = 82%; White solid; m.p. = 84.5–86.2 °C;  $^1\text{H}$  NMR (400 MHz,  $\text{CDCl}_3$ )  $\delta$  7.62–7.57 (m, 2H), 7.36–7.28 (m, 5H), 7.26–7.23 (m, 2H), 5.91 (d,  $J = 9.0$  Hz, 1H), 3.50 (s, 6H), 1.29 (s, 9H);  $^{13}\text{C}$  NMR (101 MHz,  $\text{CDCl}_3$ )  $\delta$  165.9 (d,  $J_{\text{C-F}} = 27.2$  Hz), 152.1, 148.9 (d,  $J_{\text{C-F}} = 7.9$  Hz),

136.4, 133.5 (d,  $J_{C-F} = 1.8$  Hz), 129.7, 129.1, 129.1 (d,  $J_{C-F} = 3.1$  Hz), 128.4, 124.9, 118.8 (d,  $J_{C-F} = 18.0$  Hz), 91.3 (d,  $J_{C-F} = 199.6$  Hz), 53.5, 34.8, 31.4;  $^{19}\text{F}$  NMR (377 MHz,  $\text{CDCl}_3$ )  $\delta$  -137.0 (d,  $J = 9.0$  Hz); ESI HRMS  $m/z$  ( $\text{M}+\text{Na}$ ) $^+$  calcd 487.0794, obsd 487.0796.

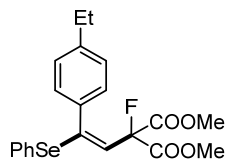

**Dimethyl (*E*)-2-(2-(4-ethylphenyl)-2-(phenylselanyl)vinyl)-2-fluoromalonate (7).** Yield = 80%; White solid; m.p. = 86.9–88.5 °C;  $^1\text{H}$  NMR (400 MHz,  $\text{CDCl}_3$ )  $\delta$  7.61–7.55 (m, 2H), 7.37–7.29 (m, 3H), 7.25–7.20 (m, 2H), 7.14–7.09 (m, 2H), 5.95 (d,  $J = 8.9$  Hz, 1H), 3.52 (s, 6H), 2.61 (q,  $J = 7.6$  Hz, 2H), 1.20 (t,  $J = 7.6$  Hz, 3H);  $^{13}\text{C}$  NMR (101 MHz,  $\text{CDCl}_3$ )  $\delta$  165.9 (d,  $J_{C-F} = 27.4$  Hz), 148.8 (d,  $J_{C-F} = 7.7$  Hz), 145.3, 136.3, 133.8 (d,  $J_{C-F} = 1.7$  Hz), 129.6, 129.3 (d,  $J_{C-F} = 3.1$  Hz), 129.1, 128.4, 127.5, 119.0 (d,  $J_{C-F} = 17.8$  Hz), 91.2 (d,  $J_{C-F} = 199.5$  Hz), 53.5, 28.8, 15.6;  $^{19}\text{F}$  NMR (377 MHz,  $\text{CDCl}_3$ )  $\delta$  -137.3 (d,  $J = 8.4$  Hz); ESI HRMS  $m/z$  ( $\text{M}+\text{Na}$ ) $^+$  calcd 459.0481, obsd 459.0482.

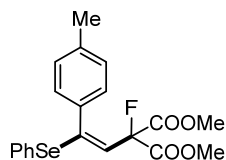

**Dimethyl (*E*)-2-fluoro-2-(2-(phenylselanyl)-2-(*p*-tolyl)vinyl)malonate (8).** Yield = 77%; White solid; m.p. = 114.5–116.4 °C;  $^1\text{H}$  NMR (400 MHz,  $\text{CDCl}_3$ )  $\delta$  7.60–7.55 (m, 2H), 7.36–7.29 (m, 3H), 7.23–7.18 (m, 2H), 7.11–7.06 (m, 2H), 5.97 (d,  $J = 9.2$  Hz, 1H), 3.54 (s, 6H), 2.31 (s, 3H);  $^{13}\text{C}$  NMR (101 MHz,  $\text{CDCl}_3$ )  $\delta$  165.8 (d,  $J_{C-F} = 27.5$  Hz), 148.6 (d,  $J_{C-F} = 7.4$  Hz), 139.0, 136.2, 133.6 (d,  $J_{C-F} = 1.6$  Hz), 129.6, 129.2 (d,  $J_{C-F} = 3.1$  Hz), 129.1, 128.6, 128.4, 119.1 (d,  $J_{C-F} = 17.7$  Hz), 91.2 (d,  $J_{C-F} = 199.5$  Hz), 53.5, 21.5;  $^{19}\text{F}$  NMR (377 MHz,  $\text{CDCl}_3$ )  $\delta$  -137.7 (d,  $J = 9.2$  Hz); ESI HRMS  $m/z$  ( $\text{M}+\text{Na}$ ) $^+$  calcd 445.0325, obsd 445.0329.

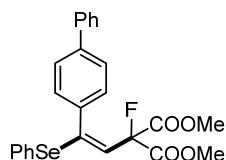

**Dimethyl (*E*)-2-(2-([1,1'-biphenyl]-4-yl)-2-(phenylselanyl)vinyl)-2-fluoromalonate (9).**

Yield = 83%; White solid; m.p. = 113.4–115.5 °C; <sup>1</sup>H NMR (400 MHz, CDCl<sub>3</sub>) δ 7.61–7.55 (m, 4H), 7.53–7.49 (m, 2H), 7.45–7.40 (m, 2H), 7.39–7.29 (m, 6H), 6.05 (d, *J* = 9.6 Hz, 1H), 3.55 (s, 6H); <sup>13</sup>C NMR (101 MHz, CDCl<sub>3</sub>) δ 165.8 (d, *J*<sub>C-F</sub> = 27.3 Hz), 147.9 (d, *J*<sub>C-F</sub> = 7.4 Hz), 141.6, 140.4, 136.2, 135.5 (d, *J*<sub>C-F</sub> = 1.5 Hz), 129.8 (d, *J*<sub>C-F</sub> = 3.3 Hz), 129.7, 129.2, 129.0, 128.2, 127.8, 127.2, 126.5, 119.6 (d, *J*<sub>C-F</sub> = 17.8 Hz), 91.3 (d, *J*<sub>C-F</sub> = 200.2 Hz), 53.6; <sup>19</sup>F NMR (377 MHz, CDCl<sub>3</sub>) δ -138.5 (d, *J* = 9.6 Hz); ESI HRMS *m/z* (M+Na)<sup>+</sup> calcd 507.0481, obsd 507.0481.

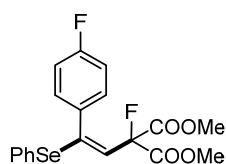

**Dimethyl (*E*)-2-fluoro-2-(2-(4-fluorophenyl)-2-(phenylselanyl)vinyl)malonate (10).**

Yield = 81%; White solid; m.p. = 81.8–83.6 °C; <sup>1</sup>H NMR (400 MHz, CDCl<sub>3</sub>) δ 7.56–7.51 (m, 2H), 7.36–7.25 (m, 5H), 6.98–6.91 (m, 2H), 6.09 (d, *J* = 10.0 Hz, 1H), 3.59 (s, 6H); <sup>13</sup>C NMR (101 MHz, CDCl<sub>3</sub>) δ 165.7 (d, *J*<sub>C-F</sub> = 27.3 Hz), 162.9 (d, *J*<sub>C-F</sub> = 249.1 Hz), 147.0 (d, *J*<sub>C-F</sub> = 7.0 Hz), 136.2, 132.6 (dd, *J*<sub>C-F</sub> = 3.6, 1.4 Hz), 131.3 (dd, *J*<sub>C-F</sub> = 8.4, 3.2 Hz), 129.7, 129.2, 128.0, 120.2 (d, *J*<sub>C-F</sub> = 17.7 Hz), 115.0 (d, *J*<sub>C-F</sub> = 21.7 Hz), 91.3 (d, *J*<sub>C-F</sub> = 200.2 Hz), 53.6; <sup>19</sup>F NMR (377 MHz, CDCl<sub>3</sub>) δ -111.9, -139.3 (d, *J* = 10.0 Hz); ESI HRMS *m/z* (M+Na)<sup>+</sup> calcd 449.0074, obsd 449.0082.

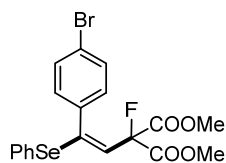

**Dimethyl (*E*)-2-(2-(4-bromophenyl)-2-(phenylselanyl)vinyl)-2-fluoromalonate (11).**

Yield = 79%; White solid; m.p. = 130.1–131.8 °C; <sup>1</sup>H NMR (400 MHz, CDCl<sub>3</sub>) δ 7.55–7.51 (m, 2H), 7.41–7.37 (m, 2H), 7.36–7.28 (m, 3H), 7.17–7.12 (m, 2H), 6.08 (d, *J* = 11.0 Hz, 1H), 3.60 (s, 6H); <sup>13</sup>C NMR (101 MHz, CDCl<sub>3</sub>) δ 165.6 (d, *J*<sub>C-F</sub> = 27.1 Hz), 146.3 (d, *J*<sub>C-F</sub> = 6.6 Hz), 136.2, 135.7, 131.1, 130.8 (d, *J*<sub>C-F</sub> = 3.1 Hz), 129.7, 129.3, 127.9, 123.1, 120.3 (d, *J*<sub>C-F</sub> = 17.6 Hz), 91.4 (d, *J*<sub>C-F</sub> = 201.0 Hz), 53.7; <sup>19</sup>F NMR (377 MHz, CDCl<sub>3</sub>) δ -140.9 (d, *J* = 11.0



Hz); ESI HRMS  $m/z$  (M+Na)<sup>+</sup> calcd 508.9273, obsd 508.9281.

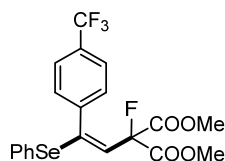

**Dimethyl (*E*)-2-fluoro-2-(2-(phenylselanyl)-2-(4-(trifluoromethyl)phenyl)vinyl)malonate (12).** Yield = 62%; White solid; m.p. = 105.8–107.3 °C; <sup>1</sup>H NMR (400 MHz, CDCl<sub>3</sub>) δ 7.55–7.49 (m, 4H), 7.38–7.27 (m, 5H), 6.13 (d,  $J$  = 12.4 Hz, 1H), 3.60 (s, 6H); <sup>13</sup>C NMR (101 MHz, CDCl<sub>3</sub>) δ 165.5 (d,  $J_{C-F}$  = 26.9 Hz), 145.3 (d,  $J_{C-F}$  = 6.0 Hz), 140.6, 136.3, 130.6 (q,  $J_{C-F}$  = 32.5 Hz), 129.8, 129.5 (d,  $J_{C-F}$  = 3.1 Hz), 129.4, 127.6, 124.8 (q,  $J_{C-F}$  = 3.8 Hz), 124.0 (q,  $J_{C-F}$  = 272.3 Hz), 120.8 (d,  $J_{C-F}$  = 17.5 Hz), 91.6 (d,  $J_{C-F}$  = 202.0 Hz), 53.7; <sup>19</sup>F NMR (377 MHz, CDCl<sub>3</sub>) δ -62.8, -143.5 (d,  $J$  = 12.4 Hz); ESI HRMS  $m/z$  (M+Na)<sup>+</sup> calcd 499.0042, obsd 499.0047.

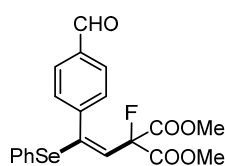

**Dimethyl (*E*)-2-fluoro-2-(2-(4-formylphenyl)-2-(phenylselanyl)vinyl)malonate (13).** Yield = 45%; White solid; m.p. = 119.5–121.8 °C; <sup>1</sup>H NMR (400 MHz, CDCl<sub>3</sub>) δ 9.96 (s, 1H), 7.78–7.74 (m, 2H), 7.53–7.49 (m, 2H), 7.42–7.37 (m, 2H), 7.35–7.26 (m, 3H), 6.20 (d,  $J$  = 12.5 Hz, 1H), 3.62 (s, 6H); <sup>13</sup>C NMR (101 MHz, CDCl<sub>3</sub>) δ 191.8, 165.4 (d,  $J_{C-F}$  = 27.0 Hz), 145.2 (d,  $J_{C-F}$  = 5.9 Hz), 143.1, 136.2, 136.0, 129.8 (d,  $J_{C-F}$  = 3.0 Hz), 129.7, 129.4, 129.1, 127.5, 120.9 (d,  $J_{C-F}$  = 17.6 Hz), 91.5 (d,  $J_{C-F}$  = 201.7 Hz), 53.7; <sup>19</sup>F NMR (377 MHz, CDCl<sub>3</sub>) δ -144.0 (d,  $J$  = 12.5 Hz); ESI HRMS  $m/z$  (M+Na)<sup>+</sup> calcd 459.0117, obsd 459.0119.

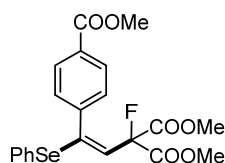

## Dimethyl

### **(E)-2-fluoro-2-(2-(4-(methoxycarbonyl)phenyl)-2-(phenylselanyl)vinyl)malonate (14).**

Yield = 53%; White solid; m.p. = 106.2–108.4 °C; <sup>1</sup>H NMR (400 MHz, CDCl<sub>3</sub>) δ 7.94–7.90 (m, 2H), 7.54–7.50 (m, 2H), 7.35–7.26 (m, 5H), 6.16 (d, *J* = 11.4 Hz, 1H), 3.89 (s, 3H), 3.59 (s, 6H); <sup>13</sup>C NMR (101 MHz, CDCl<sub>3</sub>) δ 166.7, 165.5 (d, *J*<sub>C-F</sub> = 27.1 Hz), 146.0 (d, *J*<sub>C-F</sub> = 6.4 Hz), 141.4, 136.2, 130.2, 129.7, 129.3, 129.2 (d, *J*<sub>C-F</sub> = 3.1 Hz), 129.1, 127.7, 120.6 (d, *J*<sub>C-F</sub> = 17.6 Hz), 91.4 (d, *J*<sub>C-F</sub> = 201.2 Hz), 53.7, 52.4; <sup>19</sup>F NMR (377 MHz, CDCl<sub>3</sub>) δ -142.1 (d, *J* = 11.4 Hz); ESI HRMS *m/z* (M+Na)<sup>+</sup> calcd 489.0223, obsd 489.0230.

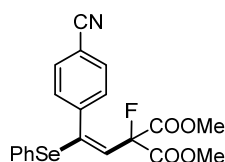

### **Dimethyl (E)-2-(2-(4-cyanophenyl)-2-(phenylselanyl)vinyl)-2-fluoromalonate (15).**

Yield = 56%; White solid; m.p. = 125.2–127.9 °C; <sup>1</sup>H NMR (400 MHz, CDCl<sub>3</sub>) δ 7.53–7.50 (m, 2H), 7.50–7.46 (m, 2H), 7.36–7.26 (m, 5H), 6.23 (d, *J* = 13.4 Hz, 1H), 3.66 (s, 6H); <sup>13</sup>C NMR (101 MHz, CDCl<sub>3</sub>) δ 165.3 (d, *J*<sub>C-F</sub> = 26.8 Hz), 144.0 (d, *J*<sub>C-F</sub> = 5.2 Hz), 141.9, 136.2, 131.6, 129.8 (2C), 129.5, 127.4, 121.4 (d, *J*<sub>C-F</sub> = 17.3 Hz), 118.6, 112.3, 91.7 (d, *J*<sub>C-F</sub> = 202.5 Hz), 53.8; <sup>19</sup>F NMR (377 MHz, CDCl<sub>3</sub>) δ -145.9 (d, *J* = 13.4 Hz); ESI HRMS *m/z* (M+Na)<sup>+</sup> calcd 456.0121, obsd 456.0125.

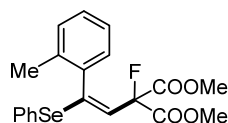

### **Dimethyl (E)-2-fluoro-2-(2-(phenylselanyl)-2-(o-tolyl)vinyl)malonate (16).**

Yield = 76%; White solid; m.p. = 69.5–72.1 °C; <sup>1</sup>H NMR (400 MHz, CDCl<sub>3</sub>) δ 7.59–7.54 (m, 2H), 7.39–7.29 (m, 3H), 7.19–7.05 (m, 3H), 7.03–6.99 (m, 1H), 6.00 (d, *J* = 10.0 Hz, 1H), 3.56 (s, 3H), 3.53 (s, 3H), 2.33 (s, 3H); <sup>13</sup>C NMR (101 MHz, CDCl<sub>3</sub>) δ 165.7 (d, *J*<sub>C-F</sub> = 27.2 Hz), 165.6 (d, *J*<sub>C-F</sub> = 27.2 Hz), 147.3, 147.2, 136.8, 136.5 (d, *J*<sub>C-F</sub> = 2.4 Hz), 135.2 (d, *J*<sub>C-F</sub> = 1.4 Hz), 130.1, 129.6, 129.5 (d, *J*<sub>C-F</sub> = 2.8 Hz), 129.4, 128.9, 127.7, 125.1, 119.1 (d, *J*<sub>C-F</sub> = 18.0

(Hz), 91.2 (d,  $J_{C-F} = 200.0$  Hz), 53.5 (2C), 19.6 (2C);  $^{19}\text{F}$  NMR (377 MHz,  $\text{CDCl}_3$ )  $\delta$  -144.1 (d,  $J = 10.0$  Hz); ESI HRMS  $m/z$  ( $\text{M}+\text{Na}$ ) $^+$  calcd 445.0325, obsd 445.0332.

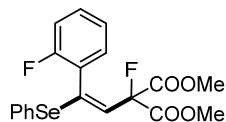

**Dimethyl (E)-2-fluoro-2-(2-(2-fluorophenyl)-2-(phenylselanyl)vinyl)malonate (17).** Yield = 69%; White solid; m.p. = 67.6–69.0 °C;  $^1\text{H}$  NMR (400 MHz,  $\text{CDCl}_3$ )  $\delta$  7.55–7.50 (m, 2H), 7.33–7.28 (m, 1H), 7.27–7.17 (m, 3H), 7.11 (td,  $J = 7.5, 1.6$  Hz, 1H), 7.00 (td,  $J = 7.5, 1.6$  Hz, 1H), 6.95–6.90 (m, 1H), 6.33 (d,  $J = 14.2$  Hz, 1H), 3.68 (s, 6H);  $^{13}\text{C}$  NMR (101 MHz,  $\text{CDCl}_3$ )  $\delta$  165.4 (d,  $J_{C-F} = 26.9$  Hz), 158.7 (dd,  $J_{C-F} = 249.0, 2.8$  Hz), 138.6 (d,  $J_{C-F} = 5.3$  Hz), 136.3, 131.1 (t,  $J_{C-F} = 2.6$  Hz), 130.6 (d,  $J_{C-F} = 8.2$  Hz), 129.4, 129.1, 127.7, 124.7 (d,  $J_{C-F} = 15.7$  Hz), 123.5 (d,  $J_{C-F} = 3.7$  Hz), 122.5 (d,  $J_{C-F} = 16.9$  Hz), 115.4 (d,  $J_{C-F} = 21.6$  Hz), 91.8 (d,  $J_{C-F} = 202.9$  Hz), 53.7;  $^{19}\text{F}$  NMR (377 MHz,  $\text{CDCl}_3$ )  $\delta$  -112.5, -151.0 (d,  $J = 14.2$  Hz); ESI HRMS  $m/z$  ( $\text{M}+\text{Na}$ ) $^+$  calcd 449.0074, obsd 449.0080.

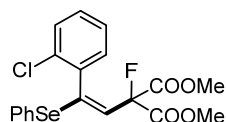

**Dimethyl (E)-2-(2-(2-chlorophenyl)-2-(phenylselanyl)vinyl)-2-fluoromalonate (18).** Yield = 68%; White solid; m.p. = 91.9–93.6 °C;  $^1\text{H}$  NMR (400 MHz,  $\text{CDCl}_3$ )  $\delta$  7.58–7.51 (m, 2H), 7.35–7.24 (m, 4H), 7.16 (td,  $J = 7.6, 1.6$  Hz, 1H), 7.11 (td,  $J = 7.6, 1.6$  Hz, 1H), 7.04 (dd,  $J = 7.6, 1.6$  Hz, 1H), 6.26 (d,  $J = 14.8$  Hz, 1H), 3.70 (s, 3H), 3.66 (s, 3H);  $^{13}\text{C}$  NMR (101 MHz,  $\text{CDCl}_3$ )  $\delta$  165.5 (d,  $J_{C-F} = 26.1$  Hz), 165.0 (d,  $J_{C-F} = 27.5$  Hz), 142.1 (d,  $J_{C-F} = 5.1$  Hz), 136.6, 135.5, 132.5 (d,  $J_{C-F} = 2.9$  Hz), 130.9 (d,  $J_{C-F} = 2.8$  Hz), 129.8, 129.4, 129.2, 127.6, 126.1, 121.6 (d,  $J_{C-F} = 17.0$  Hz), 91.9 (d,  $J_{C-F} = 203.0$  Hz), 53.8, 53.6;  $^{19}\text{F}$  NMR (377 MHz,  $\text{CDCl}_3$ )  $\delta$  -151.5 (d,  $J = 14.8$  Hz); ESI HRMS  $m/z$  ( $\text{M}+\text{Na}$ ) $^+$  calcd 464.9779, obsd 464.9778.

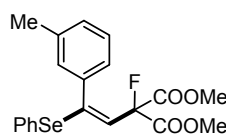

**Dimethyl (*E*)-2-fluoro-2-(2-(phenylselanyl)-2-(*m*-tolyl)vinyl)malonate (19).** Yield = 61%; White solid; m.p. = 44.3–45.8 °C; <sup>1</sup>H NMR (400 MHz, CDCl<sub>3</sub>) δ 7.62–7.57 (m, 2H), 7.37–7.30 (m, 3H), 7.20–7.07 (m, 4H), 5.94 (d, *J* = 8.8 Hz, 1H), 3.54 (s, 6H), 2.32 (s, 3H); <sup>13</sup>C NMR (101 MHz, CDCl<sub>3</sub>) δ 165.8 (d, *J*<sub>C-F</sub> = 27.5 Hz), 148.8 (d, *J*<sub>C-F</sub> = 7.7 Hz), 137.6, 136.4, 129.8 (3C), 129.7, 129.2, 128.2, 127.9, 126.3 (d, *J*<sub>C-F</sub> = 3.1 Hz), 118.8 (d, *J*<sub>C-F</sub> = 17.7 Hz), 91.1 (d, *J*<sub>C-F</sub> = 199.2 Hz), 53.5, 21.5; <sup>19</sup>F NMR (377 MHz, CDCl<sub>3</sub>) δ -137.4 (d, *J* = 8.8 Hz); ESI HRMS *m/z* (M+Na)<sup>+</sup> calcd 445.0325, obsd 445.0333.

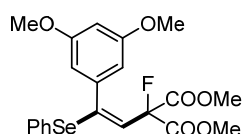

**Dimethyl (*E*)-2-(2-(3,5-dimethoxyphenyl)-2-(phenylselanyl)vinyl)-2-fluoromalonate (20).** Yield = 68%; Light yellow oil; <sup>1</sup>H NMR (400 MHz, CDCl<sub>3</sub>) δ 7.63–7.58 (m, 2H), 7.39–7.31 (m, 3H), 6.50–6.46 (m, 2H), 6.37 (t, *J* = 2.3 Hz, 1H), 5.92 (d, *J* = 8.8 Hz, 1H), 3.76 (s, 6H), 3.58 (s, 6H); <sup>13</sup>C NMR (101 MHz, CDCl<sub>3</sub>) δ 165.8 (d, *J*<sub>C-F</sub> = 27.3 Hz), 160.2, 148.2 (d, *J*<sub>C-F</sub> = 7.7 Hz), 138.3 (d, *J*<sub>C-F</sub> = 1.7 Hz), 136.3, 129.7, 129.3, 128.1, 118.9 (d, *J*<sub>C-F</sub> = 17.9 Hz), 107.1 (d, *J*<sub>C-F</sub> = 3.2 Hz), 101.8, 91.2 (d, *J*<sub>C-F</sub> = 199.5 Hz), 55.6, 53.5; <sup>19</sup>F NMR (377 MHz, CDCl<sub>3</sub>) δ -138.2 (d, *J* = 8.8 Hz); ESI HRMS *m/z* (M+Na)<sup>+</sup> calcd 491.0380, obsd 491.0387.

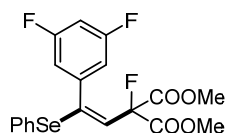

**Dimethyl (*E*)-2-(2-(3,5-difluorophenyl)-2-(phenylselanyl)vinyl)-2-fluoromalonate (21).** Yield = 60%; White solid; m.p. = 61.6–63.1 °C; <sup>1</sup>H NMR (400 MHz, CDCl<sub>3</sub>) δ 7.55–7.50 (m, 2H), 7.38–7.29 (m, 3H), 6.80–6.74 (m, 2H), 6.72–6.66 (m, 1H), 6.12 (d, *J* = 12.6 Hz, 1H), 3.67 (s, 6H); <sup>13</sup>C NMR (101 MHz, CDCl<sub>3</sub>) δ 165.4 (d, *J*<sub>C-F</sub> = 26.8 Hz), 162.2 (dd, *J*<sub>C-F</sub> = 249.5, 12.8 Hz), 144.1, 140.0 (t, *J*<sub>C-F</sub> = 9.8 Hz), 136.3, 129.8, 129.5, 127.4, 120.9 (d, *J*<sub>C-F</sub> = 17.3 Hz), 112.3 (dd, *J*<sub>C-F</sub> = 26.3, 3.2 Hz), 104.1 (t, *J*<sub>C-F</sub> = 25.2 Hz), 91.5 (d, *J*<sub>C-F</sub> = 202.2 Hz), 53.8; <sup>19</sup>F NMR (377 MHz, CDCl<sub>3</sub>) δ -109.7 (t, *J* = 8.0 Hz), -144.6 (d, *J* = 12.6 Hz); ESI HRMS *m/z* (M+Na)<sup>+</sup> calcd 466.9980, obsd 466.9985.

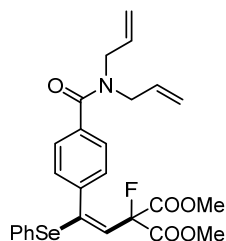

### Dimethyl

#### **(E)-2-(2-(4-(diallylcarbamoyl)phenyl)-2-(phenylselanyl)vinyl)-2-fluoromalonate (22).**

Yield = 49%; White solid; m.p. = 73.5–75.1 °C;  $^1\text{H}$  NMR (400 MHz,  $\text{CDCl}_3$ )  $\delta$  7.55–7.51 (m, 2H), 7.33–7.26 (m, 7H), 6.13 (d,  $J$  = 10.6 Hz, 1H), 5.89–5.65 (m, 2H), 5.25–5.15 (m, 4H), 4.15–4.07 (m, 2H), 3.78–3.71 (m, 2H), 3.59 (s, 6H);  $^{13}\text{C}$  NMR (101 MHz,  $\text{CDCl}_3$ )  $\delta$  171.2, 165.6 (d,  $J_{\text{C-F}}$  = 27.2 Hz), 146.9 (d,  $J_{\text{C-F}}$  = 6.8 Hz), 138.0, 136.5, 136.3, 133.2, 132.8, 129.6, 129.3 (d,  $J_{\text{C-F}}$  = 3.1 Hz), 129.2, 127.8, 126.1, 120.2 (d,  $J_{\text{C-F}}$  = 17.6 Hz), 117.9, 117.8, 91.2 (d,  $J_{\text{C-F}}$  = 200.6 Hz), 53.6, 50.8, 47.1;  $^{19}\text{F}$  NMR (377 MHz,  $\text{CDCl}_3$ )  $\delta$  -140.0 (d,  $J$  = 10.6 Hz); ESI HRMS  $m/z$  ( $\text{M}+\text{H}$ ) $^+$  calcd 532.1033, obsd 532.1035.

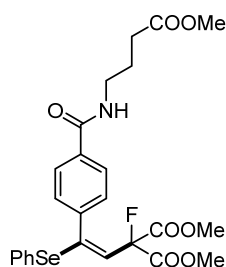

### Dimethyl

#### **(E)-2-fluoro-2-(2-(4-((4-methoxy-4-oxobutyl)carbamoyl)phenyl)-2-(phenylselanyl)vinyl)**

**malonate (23).** Yield = 60%; Yellow oil;  $^1\text{H}$  NMR (400 MHz,  $\text{CDCl}_3$ )  $\delta$  7.71–7.65 (m, 2H), 7.56–7.50 (m, 2H), 7.35–7.27 (m, 5H), 6.62 (t,  $J$  = 5.6 Hz, 1H), 6.13 (d,  $J$  = 11.2 Hz, 1H), 3.67 (s, 3H), 3.60 (s, 6H), 3.49 (q,  $J$  = 6.6 Hz, 2H), 2.45 (t,  $J$  = 6.6 Hz, 2H), 2.00–1.92 (m, 2H);  $^{13}\text{C}$  NMR (101 MHz,  $\text{CDCl}_3$ )  $\delta$  174.4, 166.8, 165.6 (d,  $J_{\text{C-F}}$  = 27.2 Hz), 146.2 (d,  $J_{\text{C-F}}$  = 6.5 Hz), 140.0, 136.2, 134.5, 129.7, 129.4 (d,  $J_{\text{C-F}}$  = 3.0 Hz), 129.3, 127.8, 126.5, 120.5 (d,  $J_{\text{C-F}}$  = 17.6 Hz), 91.4 (d,  $J_{\text{C-F}}$  = 200.9 Hz), 53.7, 52.0, 39.9, 31.9, 24.5;  $^{19}\text{F}$  NMR (377 MHz,  $\text{CDCl}_3$ )  $\delta$  -141.7 (d,  $J$  = 11.2 Hz); ESI HRMS  $m/z$  ( $\text{M}+\text{H}$ ) $^+$  calcd 552.0931, obsd 552.0931.

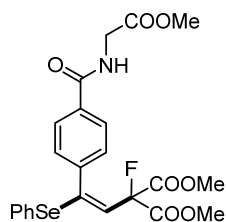

### Dimethyl

**(*E*)-2-fluoro-2-(2-(4-((2-methoxy-2-oxoethyl)carbamoyl)phenyl)-2-(phenylselanyl)vinyl)malonate (24).** Yield = 69%; Yellow solid; m.p. = 79.5–81.4 °C;  $^1\text{H}$  NMR (400 MHz,  $\text{CDCl}_3$ )  $\delta$  7.75–7.68 (m, 2H), 7.56–7.49 (m, 2H), 7.37–7.24 (m, 5H), 6.81 (t,  $J = 5.1$  Hz, 1H), 6.15 (d,  $J = 11.8$  Hz, 1H), 4.21 (d,  $J = 5.1$  Hz, 2H), 3.79 (s, 3H), 3.60 (s, 6H);  $^{13}\text{C}$  NMR (101 MHz,  $\text{CDCl}_3$ )  $\delta$  170.5, 166.8, 165.5 (d,  $J_{\text{C-F}} = 27.1$  Hz), 145.9 (d,  $J_{\text{C-F}} = 6.2$  Hz), 140.4, 136.1, 133.6, 129.7, 129.4 (d,  $J_{\text{C-F}} = 3.1$  Hz), 129.3, 127.7, 126.7, 120.5 (d,  $J_{\text{C-F}} = 17.5$  Hz), 91.4 (d,  $J_{\text{C-F}} = 201.1$  Hz), 53.7, 52.6, 41.8;  $^{19}\text{F}$  NMR (377 MHz,  $\text{CDCl}_3$ )  $\delta$  -142.3 (d,  $J = 11.8$  Hz); ESI HRMS  $m/z$  ( $\text{M}+\text{Na}$ ) $^+$  calcd 546.0438, obsd 546.0441.

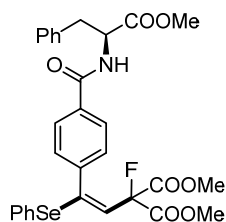

### Dimethyl

**(*S,E*)-2-fluoro-2-(2-(4-((1-methoxy-1-oxo-3-phenylpropan-2-yl)carbamoyl)phenyl)-2-(phenylselanyl)vinyl)malonate (25).** Yield = 61%; Yellow oil;  $^1\text{H}$  NMR (400 MHz,  $\text{CDCl}_3$ )  $\delta$  7.64–7.60 (m, 2H), 7.54–7.51 (m, 2H), 7.34–7.26 (m, 8H), 7.13–7.10 (m, 2H), 6.58 (d,  $J = 7.6$  Hz, 1H), 6.12 (d,  $J = 11.6$  Hz, 1H), 5.08–5.03 (m, 1H), 3.76 (s, 3H), 3.59 (s, 3H), 3.58 (s, 3H), 3.29–3.19 (m, 2H);  $^{13}\text{C}$  NMR (101 MHz,  $\text{CDCl}_3$ )  $\delta$  172.0, 166.1, 165.5 (d,  $J_{\text{C-F}} = 27.6$  Hz), 145.8 (d,  $J_{\text{C-F}} = 6.3$  Hz), 140.4, 136.1, 135.9, 133.8, 129.7, 129.4, 129.4 (d,  $J_{\text{C-F}} = 3.0$  Hz), 129.3, 128.8, 127.7, 127.4, 126.6, 120.4 (d,  $J_{\text{C-F}} = 17.5$  Hz), 91.4 (d,  $J_{\text{C-F}} = 201.4$  Hz), 53.7, 52.6, 38.0;  $^{19}\text{F}$  NMR (377 MHz,  $\text{CDCl}_3$ )  $\delta$  -142.6 (d,  $J = 11.6$  Hz); ESI HRMS  $m/z$  ( $\text{M}+\text{H}$ ) $^+$  calcd 614.1088, obsd 614.1087.

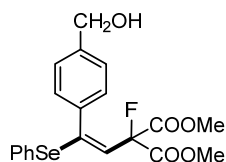

**Dimethyl (E)-2-fluoro-2-(2-(4-(hydroxymethyl)phenyl)-2-(phenylselanyl)vinyl)malonate (26).** Yield = 73%; White solid; m.p. = 69.4–71.6 °C;  $^1\text{H}$  NMR (400 MHz,  $\text{CDCl}_3$ )  $\delta$  7.59–7.55 (m, 2H), 7.37–7.27 (m, 7H), 6.02 (d,  $J$  = 10.0 Hz, 1H), 4.65 (s, 2H), 3.57 (s, 6H), 1.89 (s, 1H);  $^{13}\text{C}$  NMR (101 MHz,  $\text{CDCl}_3$ )  $\delta$  165.8 (d,  $J_{\text{C-F}}$  = 27.5 Hz), 147.9 (d,  $J_{\text{C-F}}$  = 7.0 Hz), 141.8, 136.2, 135.9, 129.7, 129.4 (d,  $J_{\text{C-F}}$  = 3.0 Hz), 129.2, 128.2, 126.4, 119.5 (d,  $J_{\text{C-F}}$  = 17.6 Hz), 91.3 (d,  $J_{\text{C-F}}$  = 199.9 Hz), 65.0, 53.6;  $^{19}\text{F}$  NMR (377 MHz,  $\text{CDCl}_3$ )  $\delta$  -139.3 (d,  $J$  = 10.0 Hz); ESI HRMS  $m/z$  ( $\text{M}+\text{Na}$ ) $^+$  calcd 461.0274, obsd 461.0279.

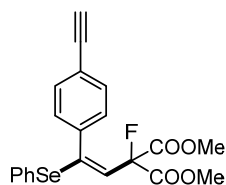

**Dimethyl (E)-2-(2-(4-ethynylphenyl)-2-(phenylselanyl)vinyl)-2-fluoromalonate (27).** Yield = 41%; White solid; m.p. = 115.6–117.4 °C;  $^1\text{H}$  NMR (400 MHz,  $\text{CDCl}_3$ )  $\delta$  7.55–7.51 (m, 2H), 7.40–7.36 (m, 2H), 7.34–7.27 (m, 3H), 7.25–7.21 (m, 2H), 6.10 (d,  $J$  = 10.8 Hz, 1H), 3.59 (s, 6H), 3.09 (s, 1H);  $^{13}\text{C}$  NMR (101 MHz,  $\text{CDCl}_3$ )  $\delta$  165.6 (d,  $J_{\text{C-F}}$  = 27.1 Hz), 146.8 (d,  $J_{\text{C-F}}$  = 6.9 Hz), 137.2 (d,  $J_{\text{C-F}}$  = 1.3 Hz), 136.2, 131.6, 129.7, 129.3 (d,  $J_{\text{C-F}}$  = 1.7 Hz), 129.2, 127.9, 122.6, 120.3 (d,  $J_{\text{C-F}}$  = 17.7 Hz), 91.3 (d,  $J_{\text{C-F}}$  = 200.7 Hz), 83.3, 78.4, 53.7;  $^{19}\text{F}$  NMR (377 MHz,  $\text{CDCl}_3$ )  $\delta$  -140.4 (d,  $J$  = 10.8 Hz); ESI HRMS  $m/z$  ( $\text{M}+\text{Na}$ ) $^+$  calcd 455.0168, obsd 455.0164.

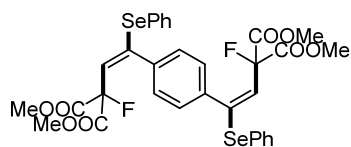

**Tetramethyl 2,2'-((1E,1'E)-1,4-phenylenebis(2-(phenylselanyl)ethene-2,1-diyl))bis(2-fluoromalonate) (28).** Yield = 52%; White solid; m.p. = 126.3–128.3 °C;  $^1\text{H}$  NMR (400 MHz,  $\text{CDCl}_3$ )  $\delta$  7.57–7.53 (m, 4H), 7.36–7.30 (m, 6H), 7.25–7.21 (m, 4H), 6.01 (d,  $J$  = 11.1 Hz, 2H), 3.56 (s,

12H);  $^{13}\text{C}$  NMR (101 MHz,  $\text{CDCl}_3$ )  $\delta$  165.7 (d,  $J_{\text{C-F}} = 27.1$  Hz), 146.5 (d,  $J_{\text{C-F}} = 6.6$  Hz), 137.2, 136.0, 129.8, 129.2, 128.7 (d,  $J_{\text{C-F}} = 3.0$  Hz), 128.1, 120.1 (d,  $J_{\text{C-F}} = 17.6$  Hz), 91.4 (d,  $J_{\text{C-F}} = 200.9$  Hz), 53.7;  $^{19}\text{F}$  NMR (377 MHz,  $\text{CDCl}_3$ )  $\delta$  -141.4 (d,  $J = 11.1$  Hz); ESI HRMS  $m/z$  ( $\text{M}+\text{Na}$ ) $^+$  calcd 760.9975, obsd 760.9983.

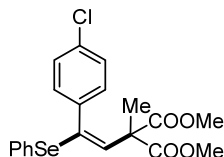

**Dimethyl (*E*)-2-(2-(4-chlorophenyl)-2-(phenylselanyl)vinyl)-2-methylmalonate (29).** Yield = 70%; White solid; m.p. = 88.5–90.1 °C;  $^1\text{H}$  NMR (400 MHz,  $\text{CDCl}_3$ )  $\delta$  7.46–7.41 (m, 2H), 7.27–7.20 (m, 3H), 7.18–7.13 (m, 2H), 7.05–7.00 (m, 2H), 6.45 (s, 1H), 3.50 (s, 6H), 1.44 (s, 3H);  $^{13}\text{C}$  NMR (101 MHz,  $\text{CDCl}_3$ )  $\delta$  170.9, 136.5, 135.2, 134.7, 133.8, 130.8, 130.5, 129.3, 129.0, 128.4, 128.0, 56.5, 52.9, 23.5; ESI HRMS  $m/z$  ( $\text{M}+\text{Na}$ ) $^+$  calcd 461.0029, obsd 461.0035.

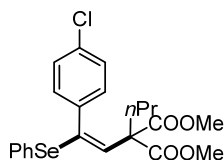

**Dimethyl (*E*)-2-(2-(4-chlorophenyl)-2-(phenylselanyl)vinyl)-2-propylmalonate (30).** Yield = 67%; White solid; m.p. = 80.6–82.0 °C;  $^1\text{H}$  NMR (400 MHz,  $\text{CDCl}_3$ )  $\delta$  7.47–7.42 (m, 2H), 7.29–7.22 (m, 3H), 7.18–7.14 (m, 2H), 6.99–6.95 (m, 2H), 6.54 (s, 1H), 3.50 (s, 6H), 1.86–1.79 (m, 2H), 1.24–1.16 (m, 2H), 0.85 (t,  $J = 7.3$  Hz, 3H);  $^{13}\text{C}$  NMR (101 MHz,  $\text{CDCl}_3$ )  $\delta$  170.4, 136.5, 135.4, 134.6, 133.9, 130.2, 129.5, 129.3, 129.0, 128.5, 128.0, 60.1, 52.7, 38.8, 18.0, 14.4; ESI HRMS  $m/z$  ( $\text{M}+\text{Na}$ ) $^+$  calcd 489.0342, obsd 489.0345.

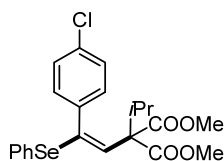

**Dimethyl (*E*)-2-(2-(4-chlorophenyl)-2-(phenylselanyl)vinyl)-2-isopropylmalonate (31).** Yield = 62%; White solid; m.p. = 88.2–90.1 °C;  $^1\text{H}$  NMR (400 MHz,  $\text{CDCl}_3$ )  $\delta$  7.48–7.43 (m,



2H), 7.28–7.21 (m, 3H), 7.17–7.12 (m, 2H), 7.04–6.99 (m, 2H), 6.31 (s, 1H), 3.41 (s, 6H), 2.42–2.33 (m, 1H), 0.97 (d,  $J = 6.8$  Hz, 6H);  $^{13}\text{C}$  NMR (101 MHz,  $\text{CDCl}_3$ )  $\delta$  169.9, 136.5, 135.5, 134.3, 133.7, 130.5, 129.3, 129.2, 129.0, 128.5, 127.8, 64.1, 52.2, 35.4, 19.1; ESI HRMS  $m/z$  ( $\text{M}+\text{Na}$ ) $^+$  calcd 489.0342, obsd 489.0349.

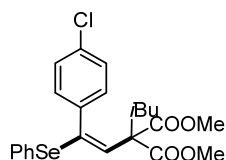

**Dimethyl (E)-2-(2-(4-chlorophenyl)-2-(phenylselanyl)vinyl)-2-isobutylmalonate (32).**

Yield = 60%; White solid; m.p. = 83.3–85.7 °C;  $^1\text{H}$  NMR (400 MHz,  $\text{CDCl}_3$ )  $\delta$  7.48–7.43 (m, 2H), 7.29–7.22 (m, 3H), 7.18–7.14 (m, 2H), 6.97–6.92 (m, 2H), 6.65 (s, 1H), 3.50 (s, 6H), 1.88 (d,  $J = 6.6$  Hz, 2H), 1.70–1.61 (m, 1H), 0.84 (d,  $J = 6.7$  Hz, 6H);  $^{13}\text{C}$  NMR (101 MHz,  $\text{CDCl}_3$ )  $\delta$  170.6, 136.5, 135.7, 134.4, 133.9, 130.2, 129.6, 129.3, 128.9, 128.6, 128.0, 59.3, 52.8, 45.3, 24.8, 23.7; ESI HRMS  $m/z$  ( $\text{M}+\text{Na}$ ) $^+$  calcd 503.0499, obsd 503.0505.

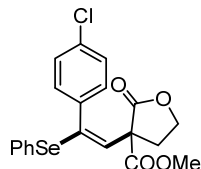

**Methyl**

**(S,E)-3-(2-(4-chlorophenyl)-2-(phenylselanyl)vinyl)-2-oxotetrahydrofuran-3-carboxylate**

**(33).** Yield = 64%; White solid; m.p. = 79.7–81.2 °C;  $^1\text{H}$  NMR (400 MHz,  $\text{CDCl}_3$ )  $\delta$  7.47–7.42 (m, 2H), 7.28–7.19 (m, 5H), 7.14–7.09 (m, 2H), 6.34 (s, 1H), 4.16–4.10 (m, 2H), 3.68 (s, 3H), 2.35–2.29 (m, 1H), 2.11–2.02 (m, 1H);  $^{13}\text{C}$  NMR (101 MHz,  $\text{CDCl}_3$ )  $\delta$  173.2, 168.6, 138.1, 136.6, 135.3, 134.4, 130.4, 129.5, 128.7, 128.5, 128.4, 127.6, 66.5, 56.7, 53.7, 34.2; ESI HRMS  $m/z$  ( $\text{M}+\text{Na}$ ) $^+$  calcd 458.9873, obsd 458.9875.

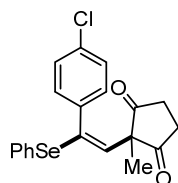

**(E)-2-(2-(4-Chlorophenyl)-2-(phenylselanyl)vinyl)-2-methylcyclopentane-1,3-dione (34).**

Yield = 58%; Light yellow solid; m.p. = 65.2–67.4 °C; <sup>1</sup>H NMR (400 MHz, CDCl<sub>3</sub>) δ 7.48–7.43 (m, 2H), 7.27–7.20 (m, 3H), 7.17–7.12 (m, 2H), 6.90–6.83 (m, 2H), 5.87 (s, 1H), 2.58–2.49 (m, 2H), 1.91–1.80 (m, 2H), 1.26 (s, 3H); <sup>13</sup>C NMR (101 MHz, CDCl<sub>3</sub>) δ 215.1, 137.7, 137.3, 135.5, 134.4, 132.3, 131.1, 129.4, 128.6, 128.4, 128.3, 59.1, 35.0, 23.2; ESI HRMS *m/z* (M+H)<sup>+</sup> calcd 405.0155, obsd 405.0160.

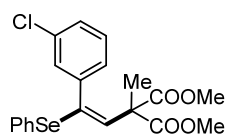

**Dimethyl (E)-2-(2-(3-chlorophenyl)-2-(phenylselanyl)vinyl)-2-methylmalonate (35).**

Yield = 58%; White solid; m.p. = 48.6–50.8 °C; <sup>1</sup>H NMR (400 MHz, CDCl<sub>3</sub>) δ 7.47–7.42 (m, 2H), 7.30–7.21 (m, 3H), 7.16–7.08 (m, 2H), 7.07–7.05 (m, 1H), 6.96–6.92 (m, 1H), 6.46 (s, 1H), 3.52 (s, 6H), 1.44 (s, 3H); <sup>13</sup>C NMR (101 MHz, CDCl<sub>3</sub>) δ 170.9, 139.7, 135.5, 134.4, 133.5, 130.7, 129.3, 129.2, 129.0, 128.8, 128.5, 128.1, 127.3, 56.4, 52.9, 23.6; ESI HRMS *m/z* (M+Na)<sup>+</sup> calcd 461.0029, obsd 461.0034.

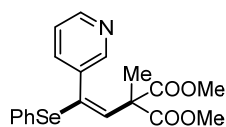

**Dimethyl (E)-2-methyl-2-(2-(phenylselanyl)-2-(pyridin-3-yl)vinyl)malonate (36).**

Yield = 60%; White solid; m.p. = 84.8–85.7 °C; <sup>1</sup>H NMR (400 MHz, CDCl<sub>3</sub>) δ 8.41–8.34 (m, 1H), 8.30 (s, 1H), 7.45–7.40 (m, 2H), 7.38–7.34 (m, 1H), 7.28–7.19 (m, 3H), 7.09 (dd, *J* = 7.8, 4.9 Hz, 1H), 6.61 (s, 1H), 3.50 (s, 6H), 1.47 (s, 3H); <sup>13</sup>C NMR (101 MHz, CDCl<sub>3</sub>) δ 170.8, 149.6, 148.8, 136.4, 135.4, 134.0, 132.4, 132.1, 129.3, 128.6, 128.5, 122.5, 56.5, 53.0, 23.9; ESI HRMS *m/z* (M+H)<sup>+</sup> calcd 406.0552, obsd 406.0554.

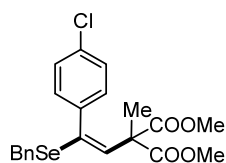

**Dimethyl (*E*)-2-(2-(benzylselanyl)-2-(4-chlorophenyl)vinyl)-2-methylmalonate (37).** Yield = 63%; Yellow solid; m.p. = 71.3–73.4 °C; <sup>1</sup>H NMR (400 MHz, CDCl<sub>3</sub>) δ 7.29–7.23 (m, 4H), 7.21–7.17 (m, 3H), 7.12–7.08 (m, 2H), 6.49 (s, 1H), 3.74 (s, 2H), 3.51 (s, 6H), 1.42 (s, 3H); <sup>13</sup>C NMR (101 MHz, CDCl<sub>3</sub>) δ 171.0, 137.9, 136.6, 134.1, 133.7, 130.7, 130.0, 129.1, 128.6, 128.3, 127.0, 56.4, 52.9, 31.0, 23.6; ESI HRMS *m/z* (M+Na)<sup>+</sup> calcd 475.0186, obsd 475.0187.

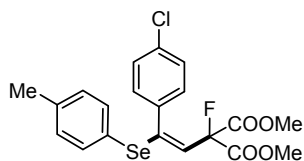

**Dimethyl (*E*)-2-(2-(4-chlorophenyl)-2-(*p*-tolylselanyl)vinyl)-2-fluoromalonate (38).** Yield = 64%; White solid; m.p. = 121.3–123.0 °C; <sup>1</sup>H NMR (400 MHz, CDCl<sub>3</sub>) δ 7.45–7.40 (m, 2H), 7.26–7.20 (m, 4H), 7.15–7.10 (m, 2H), 6.02 (d, *J* = 10.8 Hz, 1H), 3.59 (s, 6H), 2.35 (s, 3H); <sup>13</sup>C NMR (101 MHz, CDCl<sub>3</sub>) δ 165.7 (d, *J*<sub>C-F</sub> = 27.2 Hz), 146.9 (d, *J*<sub>C-F</sub> = 6.8 Hz), 139.6, 136.3, 135.2, 134.9, 130.6, 130.5, 128.2, 124.3, 119.6 (d, *J*<sub>C-F</sub> = 17.6 Hz), 91.4 (d, *J*<sub>C-F</sub> = 200.5 Hz), 53.7, 21.5; <sup>19</sup>F NMR (377 MHz, CDCl<sub>3</sub>) δ -140.2 (d, *J* = 10.8 Hz); ESI HRMS *m/z* (M+Na)<sup>+</sup> calcd 478.9935, obsd 478.9942.

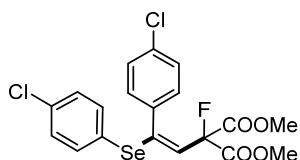

**Dimethyl (*E*)-2-(2-(4-chlorophenyl)-2-(4-chlorophenyl)selanyl)vinyl)-2-fluoromalonate (39).** Yield = 72%; m.p. = 119.7–121.2 °C; White solid; <sup>1</sup>H NMR (400 MHz, CDCl<sub>3</sub>) δ 7.47–7.42 (m, 2H), 7.29–7.23 (m, 4H), 7.22–7.17 (m, 2H), 6.14 (d, *J* = 10.9 Hz, 1H), 3.62 (s, 6H); <sup>13</sup>C NMR (101 MHz, CDCl<sub>3</sub>) δ 165.5 (d, *J*<sub>C-F</sub> = 27.0 Hz), 145.7 (d, *J*<sub>C-F</sub> = 6.5 Hz), 137.3, 135.7, 135.1, 134.9, 130.6 (d, *J*<sub>C-F</sub> = 3.1 Hz), 129.9, 128.2, 126.1, 121.0 (d, *J*<sub>C-F</sub> = 17.6 Hz), 91.3 (d, *J*<sub>C-F</sub> = 201.3 Hz), 53.7; <sup>19</sup>F NMR (377 MHz, CDCl<sub>3</sub>) δ -141.3 (d, *J*<sub>C-F</sub> = 10.9 Hz); ESI HRMS *m/z* (M+Na)<sup>+</sup> calcd 498.9389, obsd 498.9392.

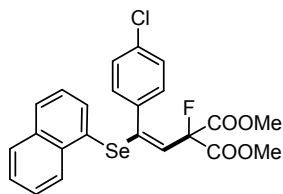

**Dimethyl (E)-2-(2-(4-chlorophenyl)-2-(naphthalen-1-ylselanyl)vinyl)-2-fluoromalonate (40).** Yield = 75%; White solid; m.p. = 124.2–125.9 °C;  $^1\text{H}$  NMR (400 MHz,  $\text{CDCl}_3$ )  $\delta$  8.37 (d,  $J = 8.4$  Hz, 1H), 7.91–7.82 (m, 3H), 7.61–7.51 (m, 2H), 7.41–7.36 (m, 1H), 7.22–7.17 (m, 4H), 5.84 (d,  $J = 12.0$  Hz, 1H), 3.51 (s, 6H);  $^{13}\text{C}$  NMR (101 MHz,  $\text{CDCl}_3$ )  $\delta$  165.5 (d,  $J_{\text{C-F}} = 27.2$  Hz), 145.3 (d,  $J_{\text{C-F}} = 6.4$  Hz), 136.8, 135.1, 134.8, 134.5, 134.3, 131.0, 130.4 (d,  $J_{\text{C-F}} = 3.1$  Hz), 128.8, 128.1, 128.0, 127.5, 127.2, 126.6, 126.1, 120.0 (d,  $J_{\text{C-F}} = 17.6$  Hz), 91.5 (d,  $J_{\text{C-F}} = 200.8$  Hz), 53.6;  $^{19}\text{F}$  NMR (377 MHz,  $\text{CDCl}_3$ )  $\delta$  -142.4 (d,  $J = 12.0$  Hz); ESI HRMS  $m/z$  ( $\text{M}+\text{Na}$ ) $^+$  calcd 514.9935, obsd 514.9938.

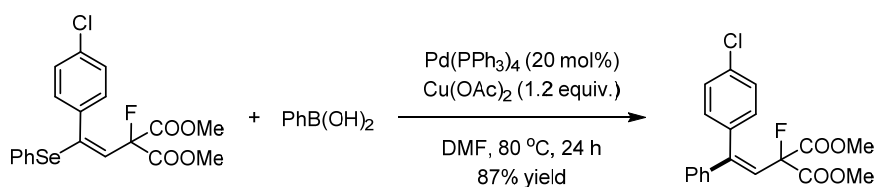

**Dimethyl (Z)-2-(2-(4-chlorophenyl)-2-phenylvinyl)-2-fluoromalonate (41).** To a solution of **4** (88 mg, 0.2 mmol, 1.0 equiv.),  $\text{Pd}(\text{PPh}_3)_4$  (46 mg, 20 mol%) and phenylboronic acid (73 mg, 0.6 mmol, 3 equiv.) in DMF (3 mL) was added  $\text{Cu}(\text{OAc})_2$  (44 mg, 2.4 mmol, 1.2 equiv.). The resulting mixture was stirred at 80 °C for 24 h. After that, the reaction was cooled to room temperature, diluted with ethyl acetate (10 mL) and then washed with saturated solution of  $\text{NH}_4\text{Cl}$  (20 mL). The organic phase was separated, dried over  $\text{Na}_2\text{SO}_4$  and concentrated under vacuum. The residue was chromatographed through silica gel eluting with ethyl acetate/petroleum ether to give the corresponding products **41** as a white solid (63 mg, 87% yield). m.p. = 114.7–116.5 °C;  $^1\text{H}$  NMR (400 MHz,  $\text{CDCl}_3$ )  $\delta$  7.36–7.28 (m, 5H), 7.27–7.22 (m, 2H), 7.18–7.13 (m, 2H), 6.56 (d,  $J = 11.2$  Hz, 1H), 3.68 (s, 6H);  $^{13}\text{C}$  NMR (101 MHz,  $\text{CDCl}_3$ )  $\delta$  166.1 (d,  $J = 27.0$  Hz), 149.9 (d,  $J = 5.6$  Hz), 141.0 (d,  $J = 2.6$  Hz), 136.1 (d,  $J = 1.7$  Hz), 134.6, 131.6 (d,  $J = 3.8$  Hz), 129.1, 128.5, 128.3, 128.0 (d,  $J = 2.1$  Hz), 120.3 (d,  $J = 16.4$  Hz), 91.5 (d,  $J = 199.4$  Hz), 53.8;  $^{19}\text{F}$  NMR (377 MHz,  $\text{CDCl}_3$ )  $\delta$  -141.8 (d,  $J = 11.1$  Hz); ESI HRMS  $m/z$  ( $\text{M}+\text{Na}$ ) $^+$  calcd 391.1880, obsd 391.1883.

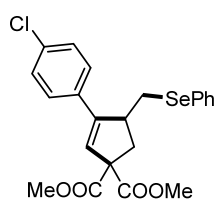

### Dimethyl

#### 3-(4-chlorophenyl)-4-((phenylselanyl)methyl)cyclopent-2-ene-1,1-dicarboxylate (43).

Yield = 35%; Light yellow oil;  $^1\text{H}$  NMR (400 MHz,  $\text{CDCl}_3$ )  $\delta$  7.53–7.47 (m, 2H), 7.29–7.23 (m, 5H), 7.17–7.11 (m, 2H), 6.10 (d,  $J = 1.5$  Hz, 1H), 3.77 (s, 3H), 3.73 (s, 3H), 3.52–3.44 (m, 1H), 3.14 (dd,  $J = 12.2, 3.2$  Hz, 1H), 2.87 (dd,  $J = 14.2, 9.6$  Hz, 1H), 2.71 (dd,  $J = 12.2, 9.6$  Hz, 1H), 2.63 (dd,  $J = 14.2, 3.2$  Hz, 1H);  $^{13}\text{C}$  NMR (101 MHz,  $\text{CDCl}_3$ )  $\delta$  171.5, 171.5, 148.6, 134.2, 133.9, 132.6, 129.6, 129.2, 128.9, 128.0, 127.5, 125.0, 65.4, 53.2, 53.1, 45.3, 37.6, 32.8; ESI HRMS  $m/z$  ( $\text{M}+\text{Na}$ ) $^+$  calcd 487.0186, obsd 487.0187.

## 7. Synthesis and Characterization of Substrates

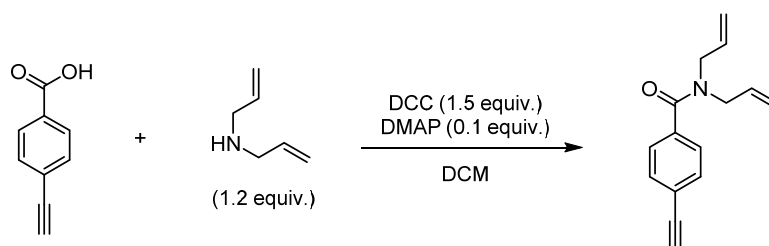

**3-(4-Methoxyphenyl)propyl 2-(4-*iso*-butylphenyl)propanoate (S1).** To a solution of 4-ethynylbenzoic acid (438 mg, 3.0 mmol, 1.0 equiv.), diallylamine (0.44 mL, 3.6 mmol, 1.2 equiv.) and DMAP (37 mg, 0.3 mmol, 0.1 equiv.) in  $\text{CH}_2\text{Cl}_2$  (10 mL) was added DCC (0.74 mL, 4.5 mmol, 1.5 equiv.). The reaction mixture was stirred for 12 h at r.t. The solvent was evaporated under reduced pressure and the residue was chromatographed through silica gel eluting with ethyl acetate/petroleum ether to give the desired product as a white solid (466 mg, 69% yield).  $^1\text{H}$  NMR (400 MHz,  $\text{CDCl}_3$ )  $\delta$  7.53–7.49 (m, 2H), 7.42–7.38 (m, 2H), 5.93–5.66 (m, 2H), 5.27–5.16 (m, 4H), 4.20–4.06 (m, 2H), 3.89–3.74 (m, 2H), 3.15 (s, 1H);  $^{13}\text{C}$  NMR (101 MHz,  $\text{CDCl}_3$ )  $\delta$  171.1, 136.5, 133.1, 132.7, 132.2, 126.8, 123.7, 118.0, 117.9, 83.0, 78.8, 50.8, 47.2.

## 8. X-Ray Crystallography

### X-Ray single crystal diffraction analysis of compound 4 (CCDC: 2150878)

Single crystals suitable for X-ray diffraction were obtained by slow evaporation of a saturated solution of each compound (Petroleum ether/ $\text{CH}_2\text{Cl}_2$ ) in a loosely capped vial.

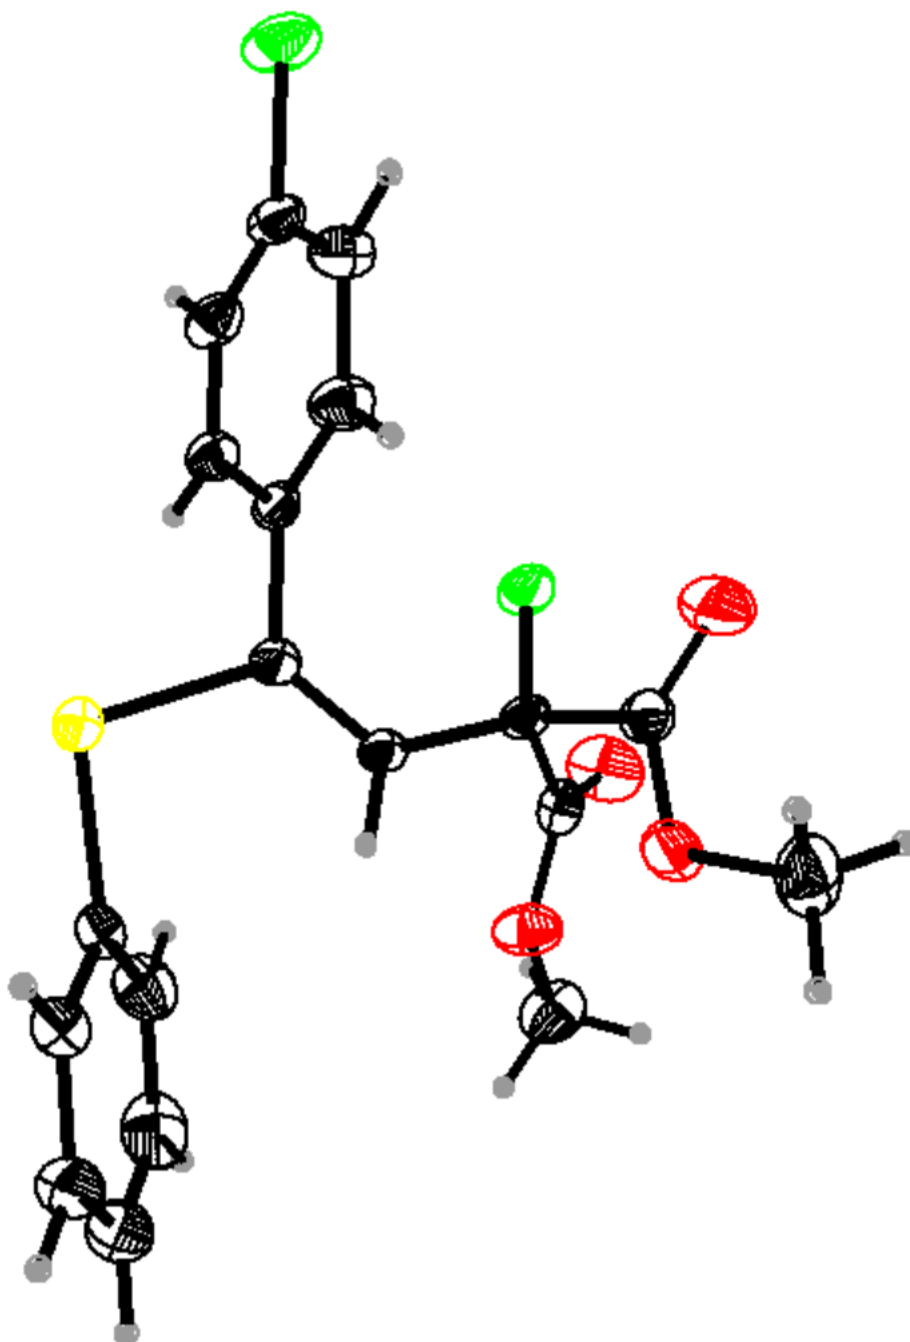

**Figure S2.** ORTEP diagram of 4 with thermal displacement parameters drawn at 30% probability.

## Datablock: 1

---

Bond precision: C-C = 0.0046 Å

Wavelength=0.71073

Cell: a=7.4845(8) b=10.2563(12) c=13.5628(15)  
alpha=99.603(2) beta=100.338(2) gamma=109.552(2)  
Temperature: 273 K

|                        | Calculated         | Reported           |
|------------------------|--------------------|--------------------|
| Volume                 | 935.82(18)         | 935.81(18)         |
| Space group            | P -1               | P -1               |
| Hall group             | -P 1               | -P 1               |
| Moiety formula         | C19 H16 Cl F O4 Se | ?                  |
| Sum formula            | C19 H16 Cl F O4 Se | C19 H16 Cl F O4 Se |
| Mr                     | 441.73             | 441.73             |
| Dx, g cm <sup>-3</sup> | 1.568              | 1.568              |
| Z                      | 2                  | 2                  |
| Mu (mm <sup>-1</sup> ) | 2.179              | 2.179              |
| F000                   | 444.0              | 444.0              |
| F000'                  | 444.32             |                    |
| h, k, lmax             | 8, 12, 16          | 8, 12, 16          |
| Nref                   | 3292               | 3270               |
| Tmin, Tmax             | 0.573, 0.633       |                    |
| Tmin'                  | 0.562              |                    |

Correction method= Not given

Data completeness= 0.993

Theta(max)= 24.999

R(reflections)= 0.0329( 2786)

wR2(reflections)=  
0.0891( 3270)

S = 1.056

Npar= 237

## 9. NMR Spectra for Compounds

### Compound 4

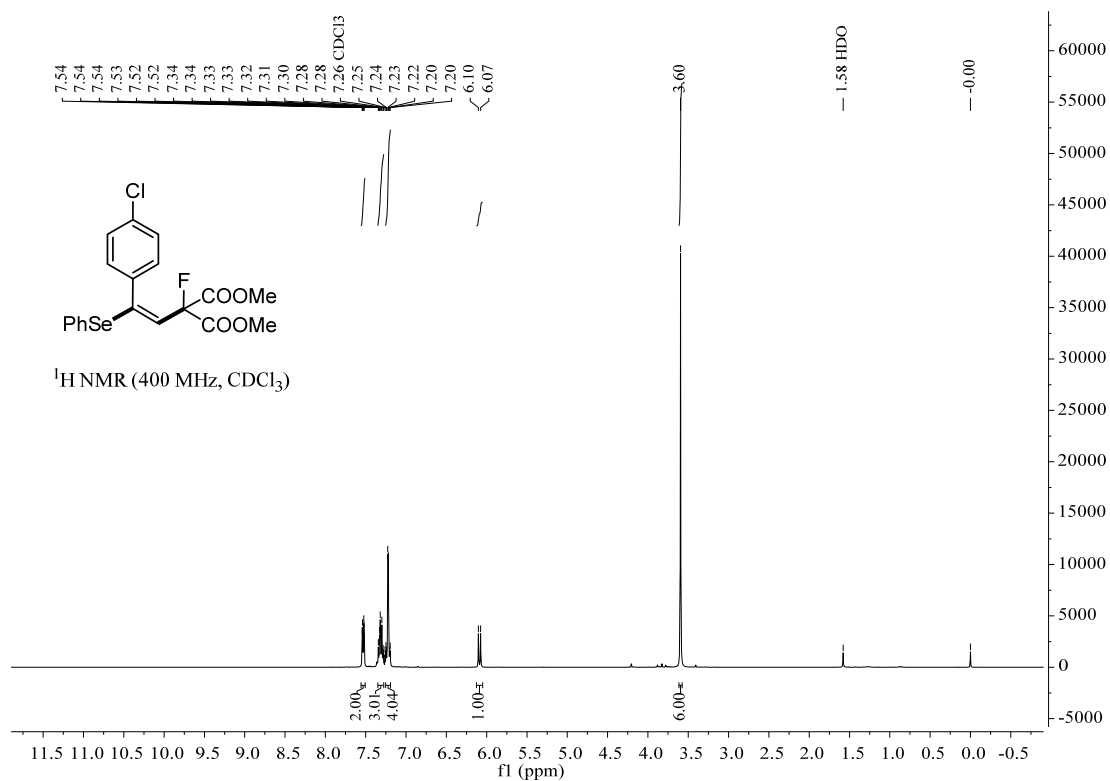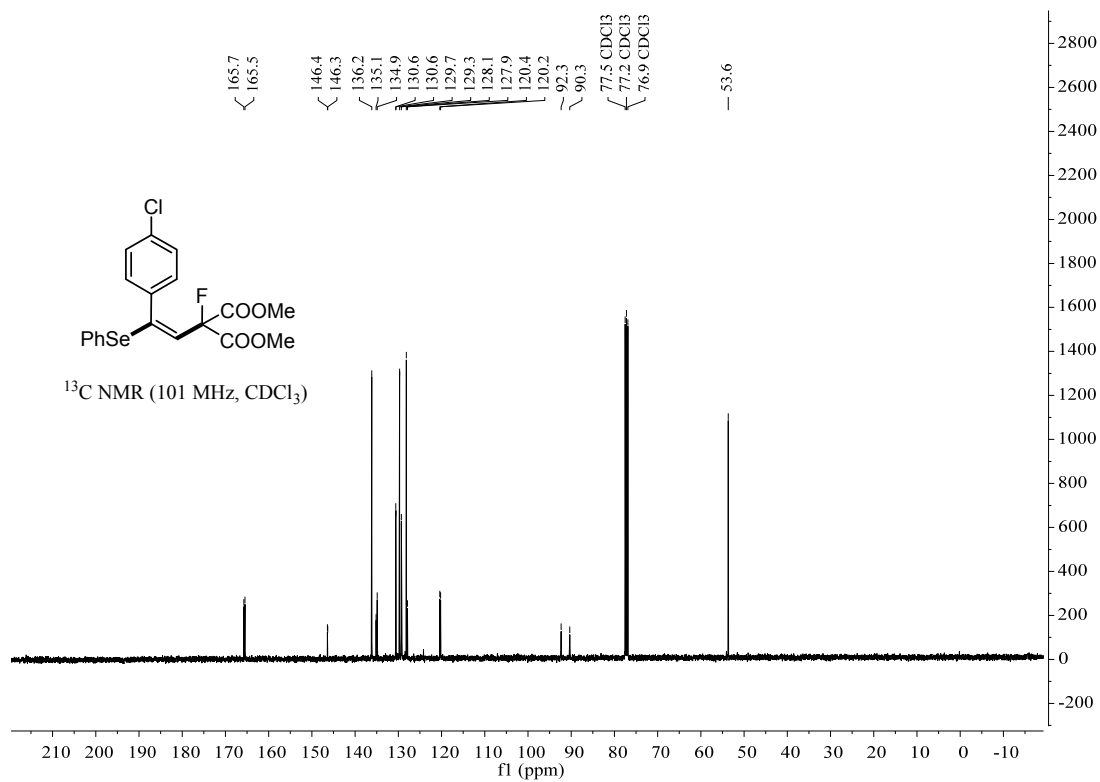



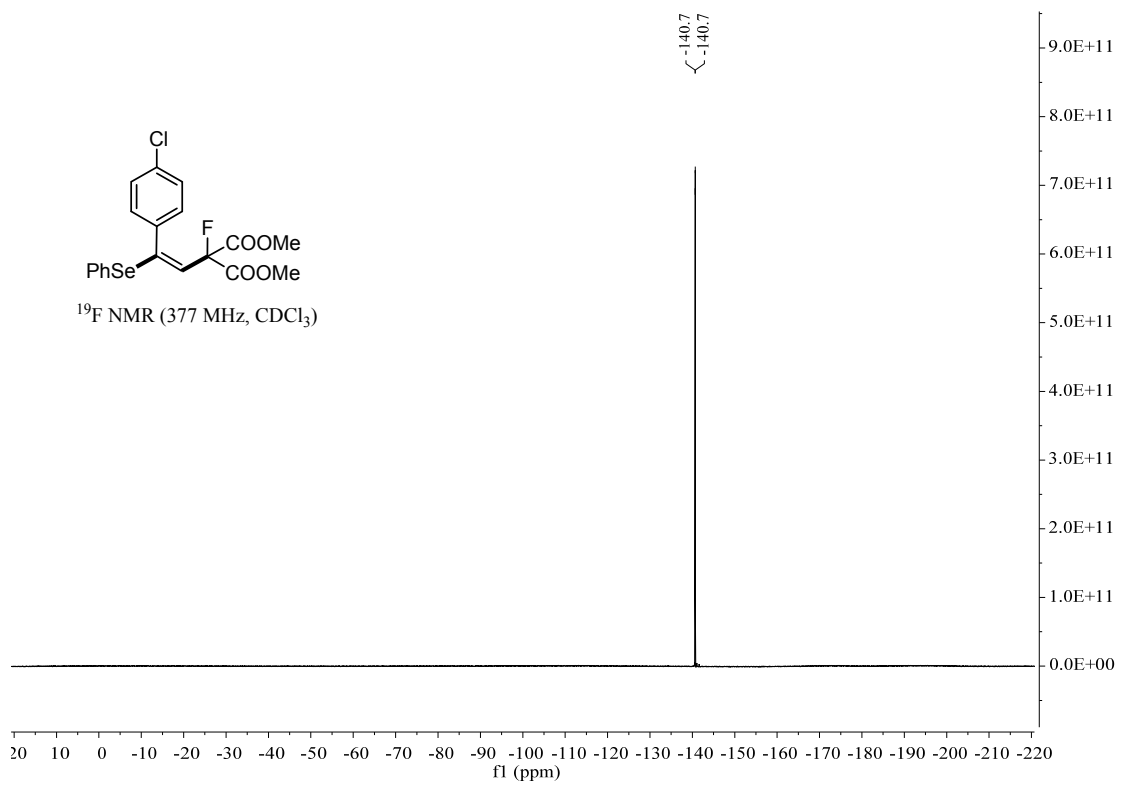

# Compound 5

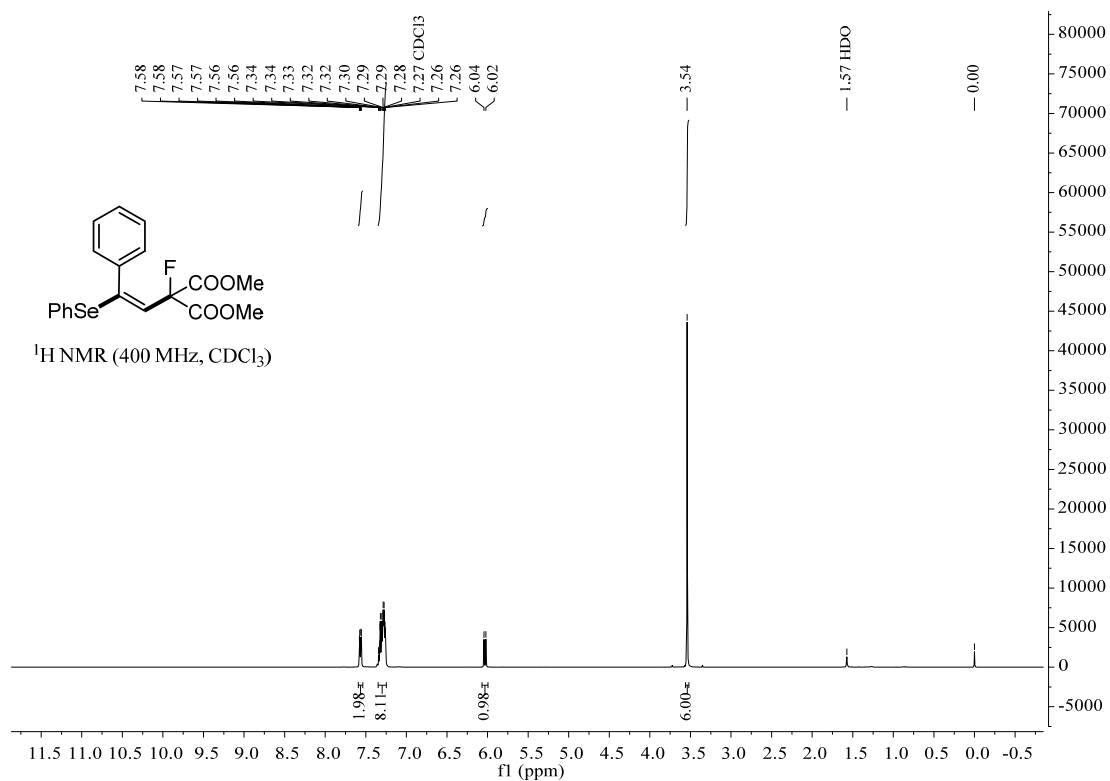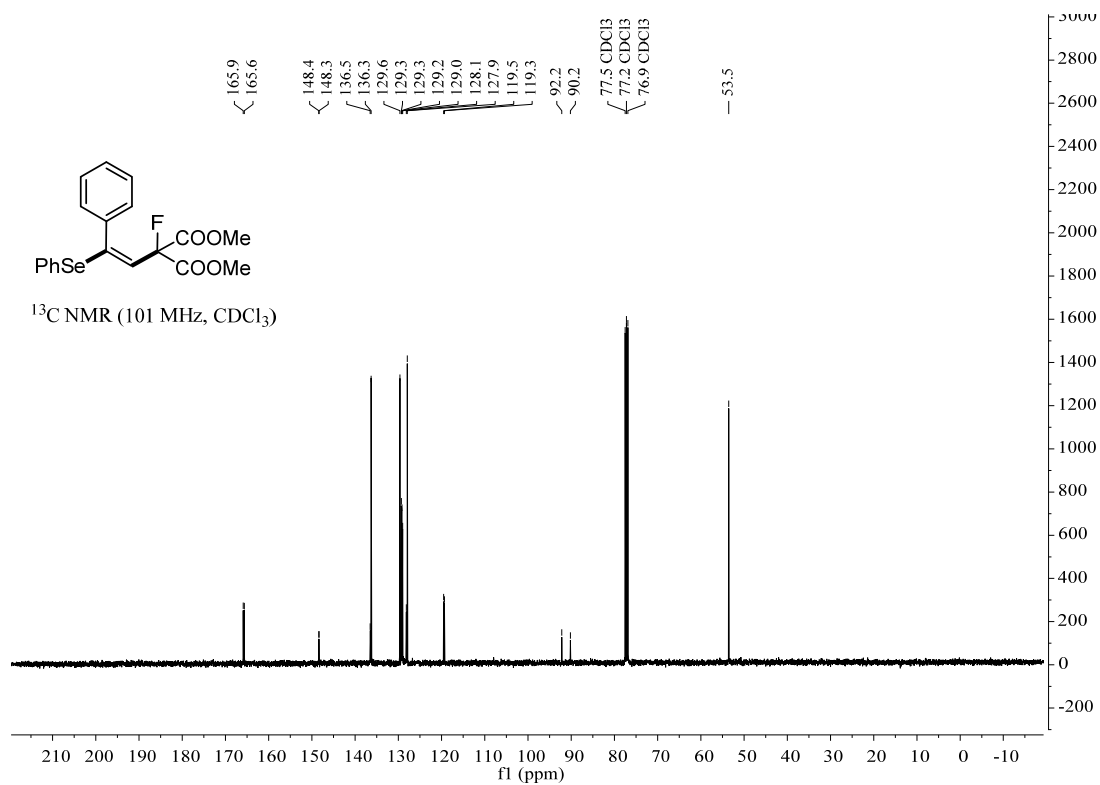

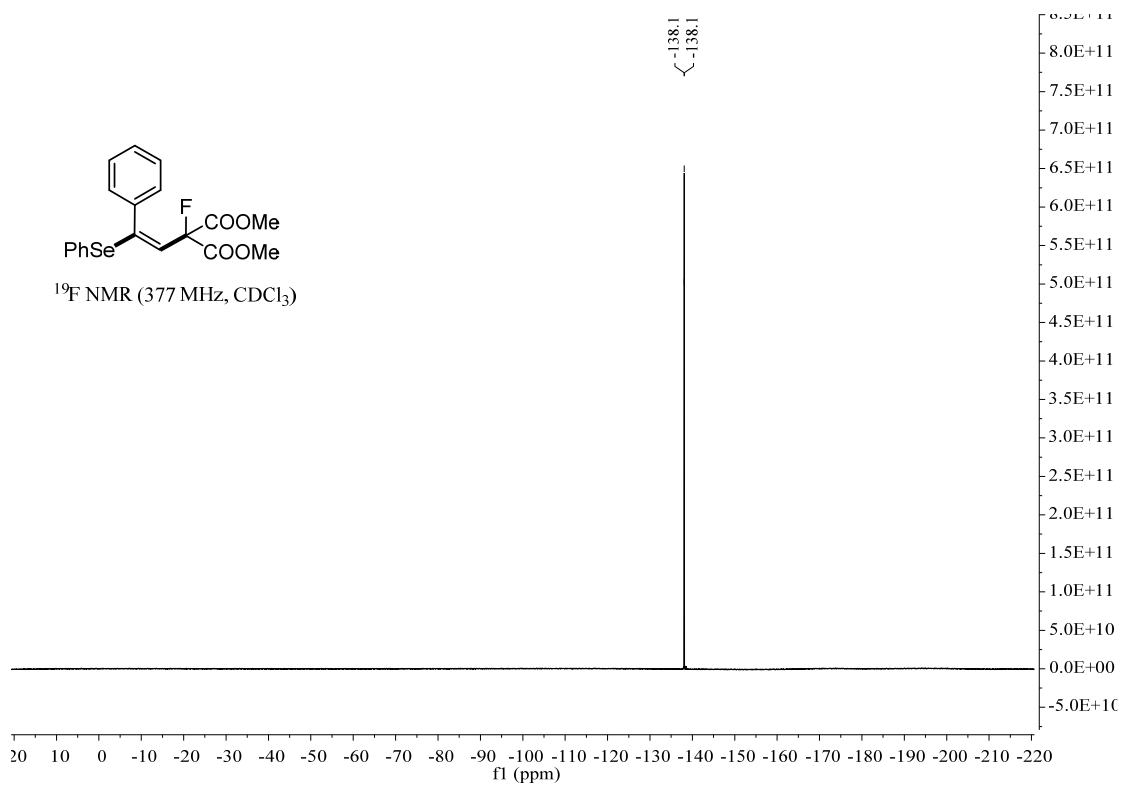

# Compound 6

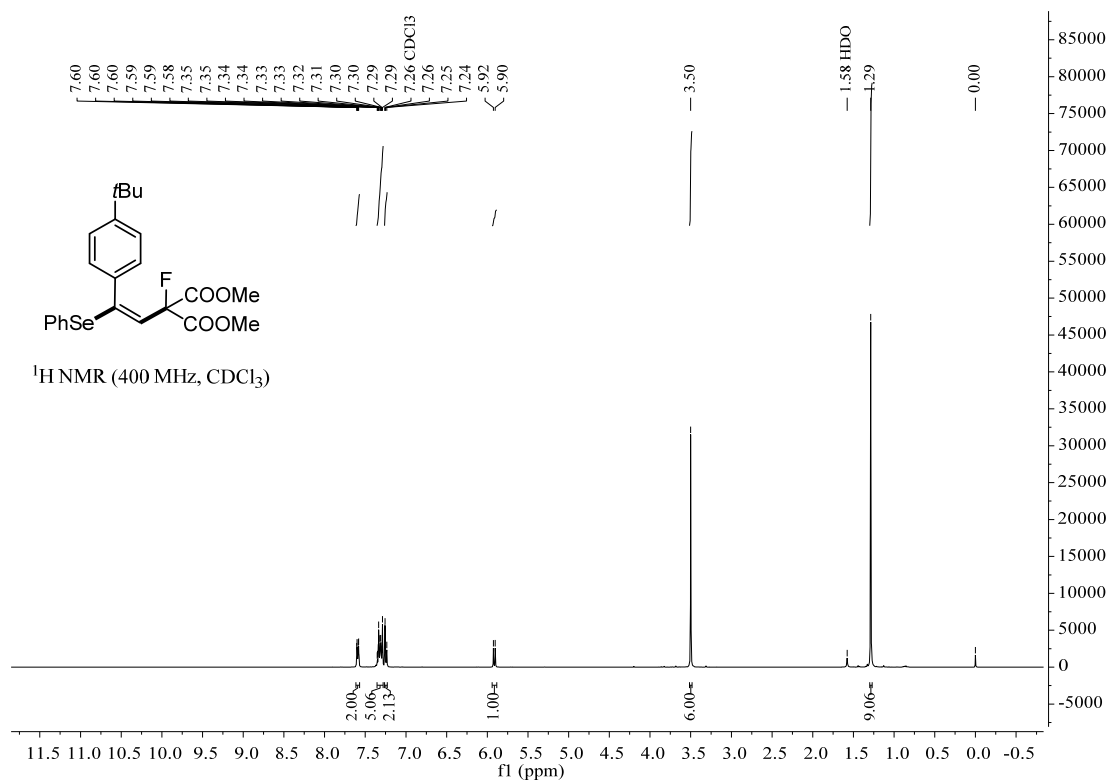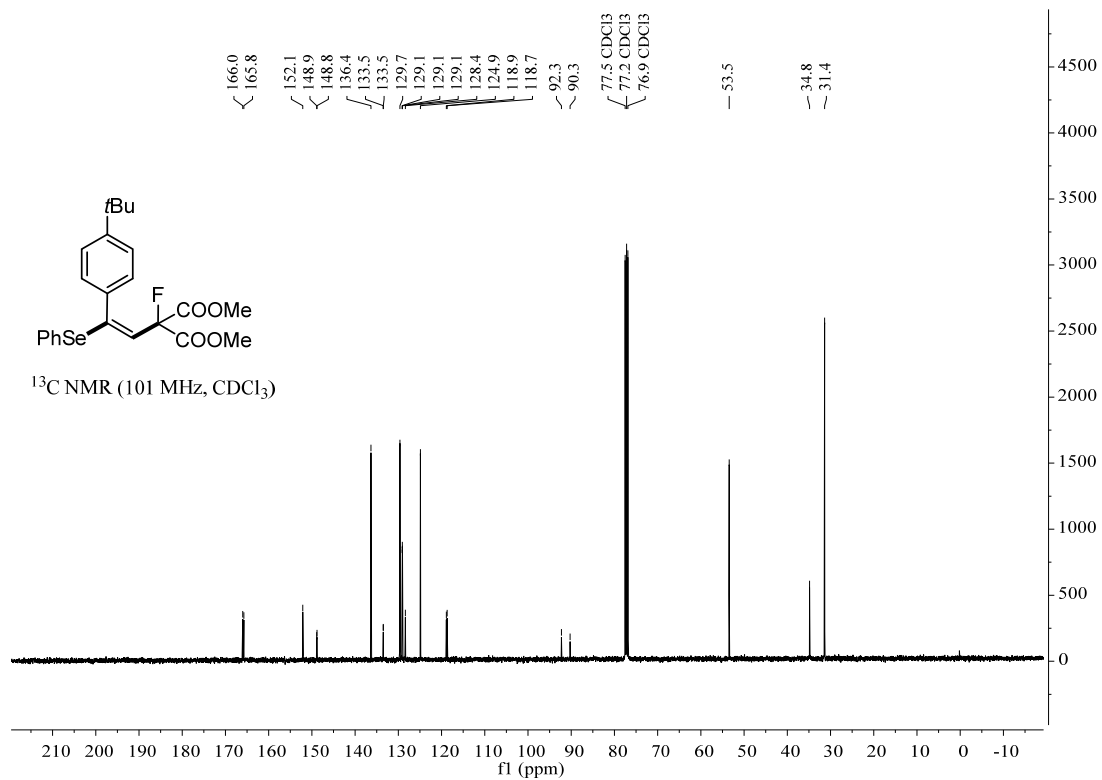

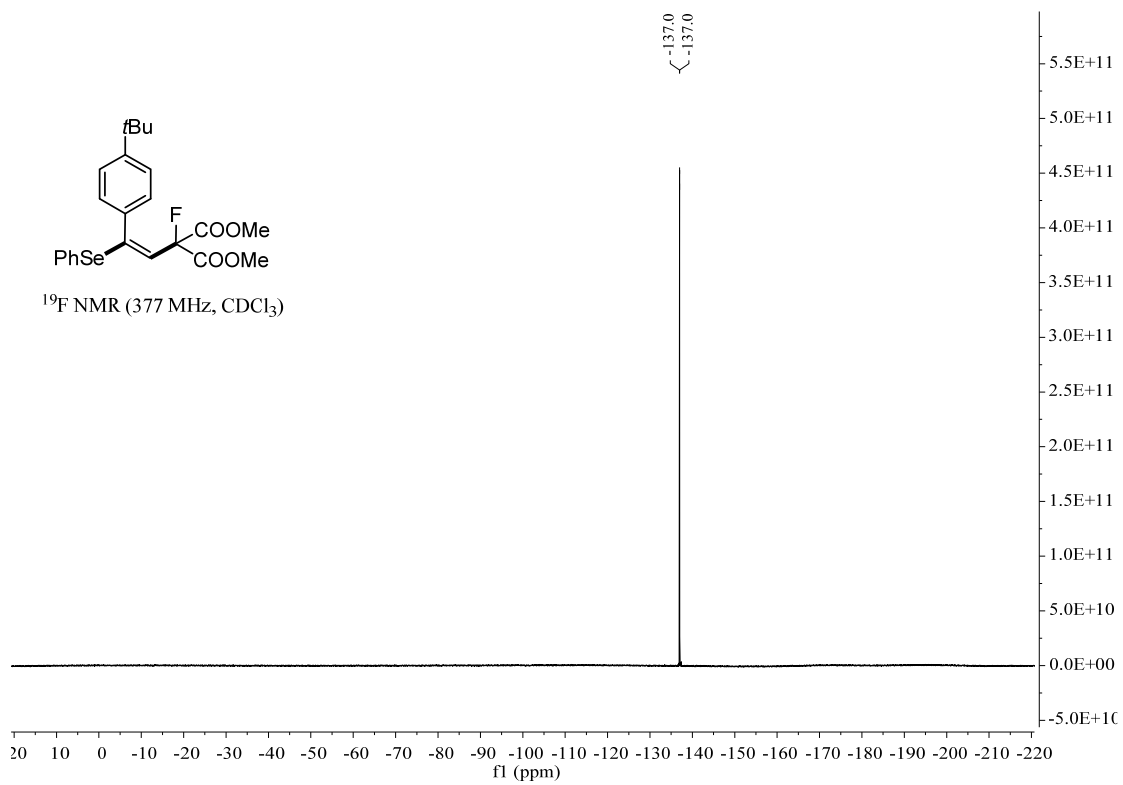

# Compound 7

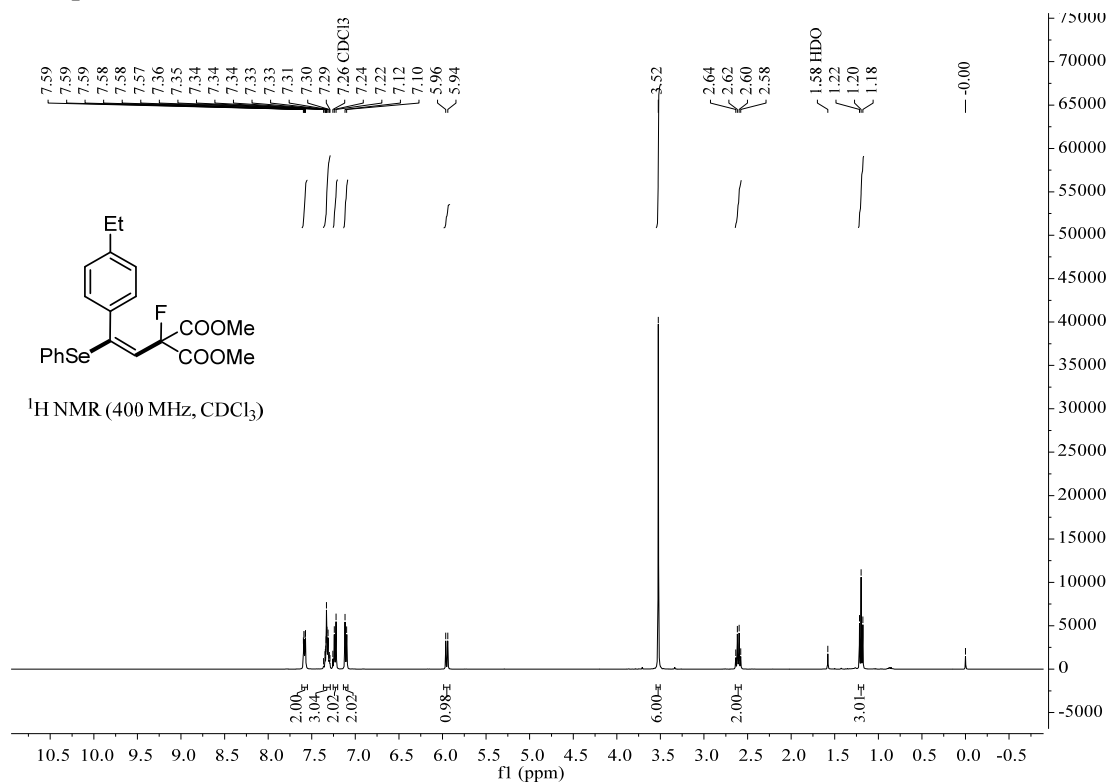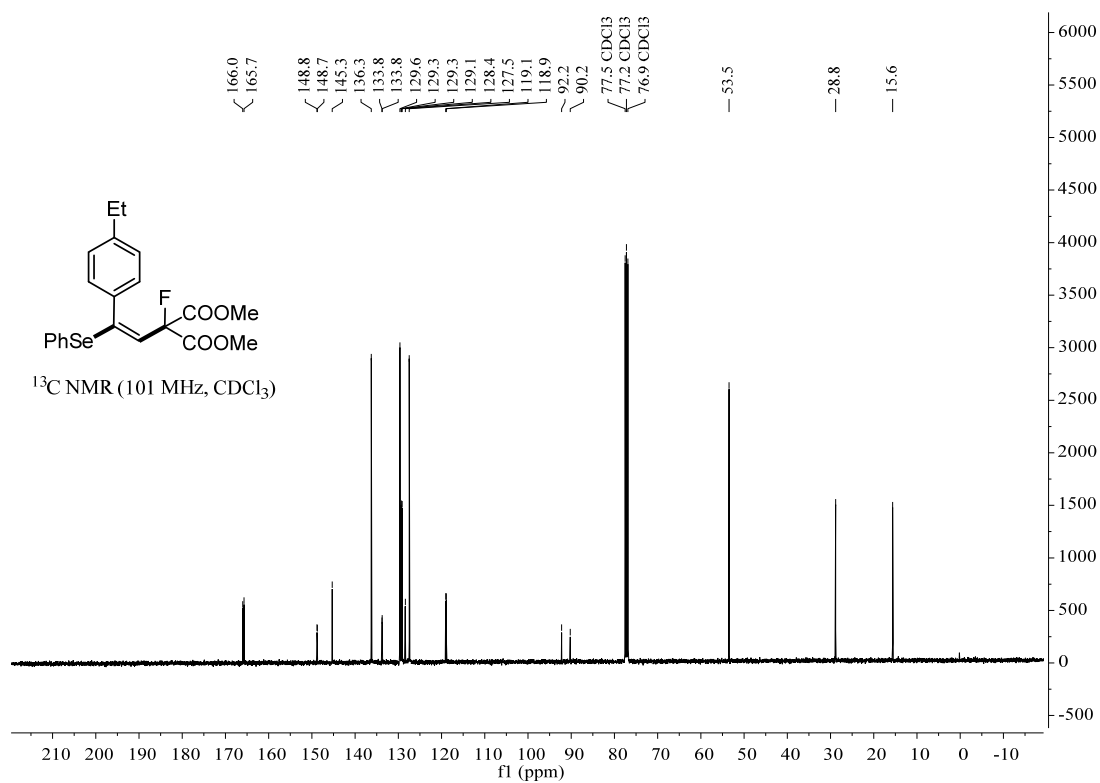

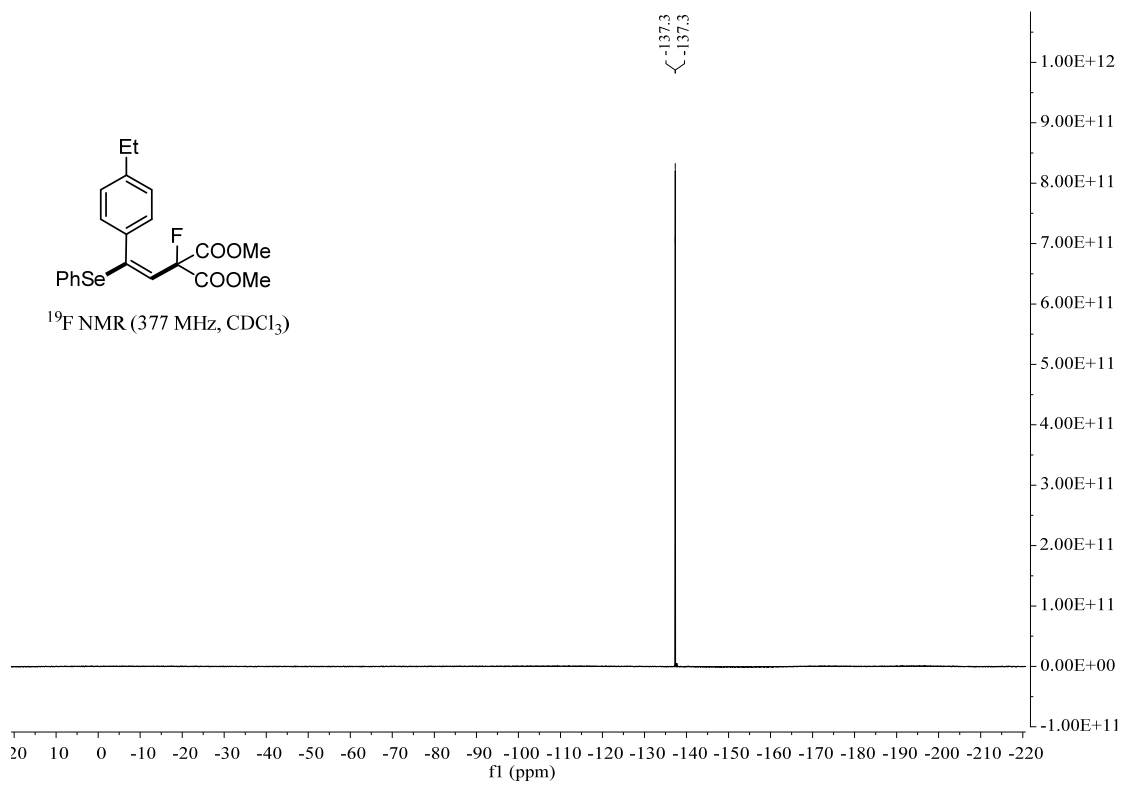

# Compound 8

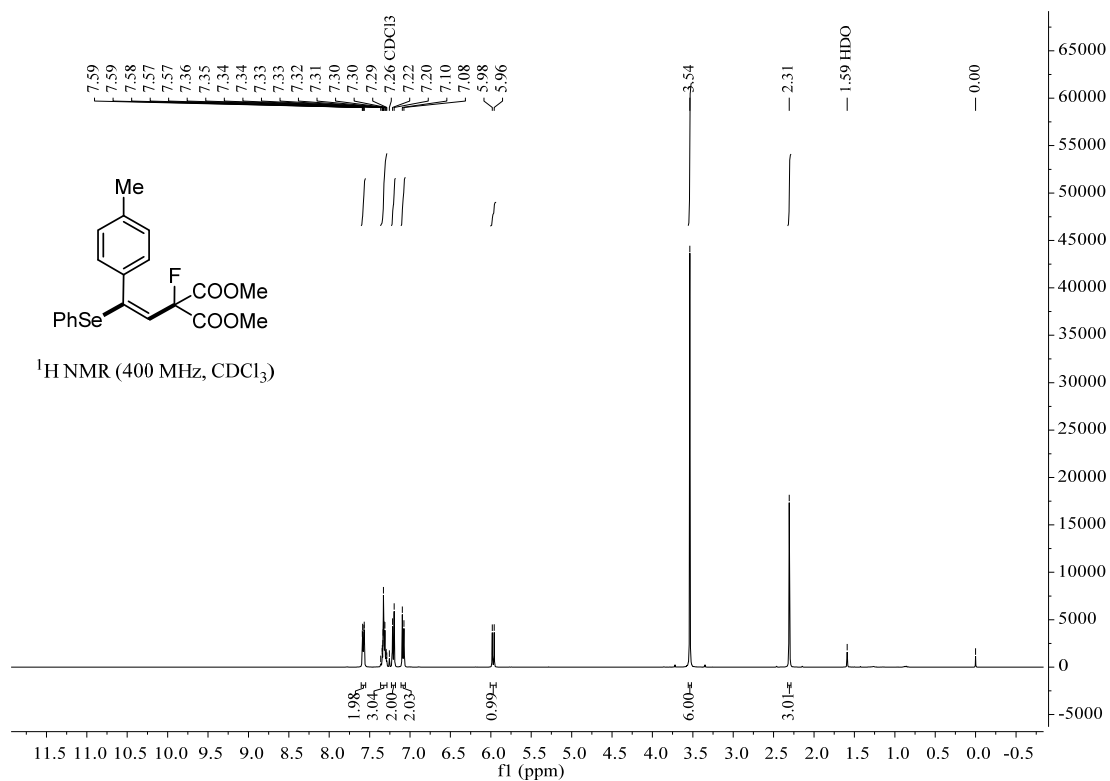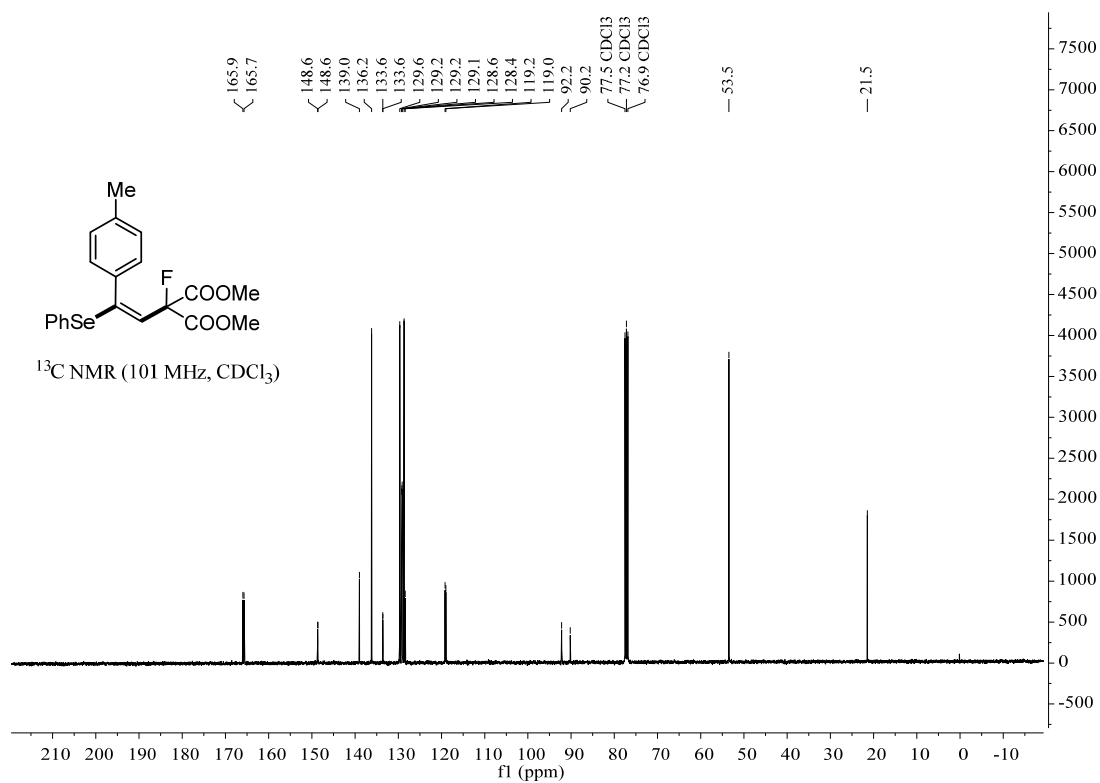



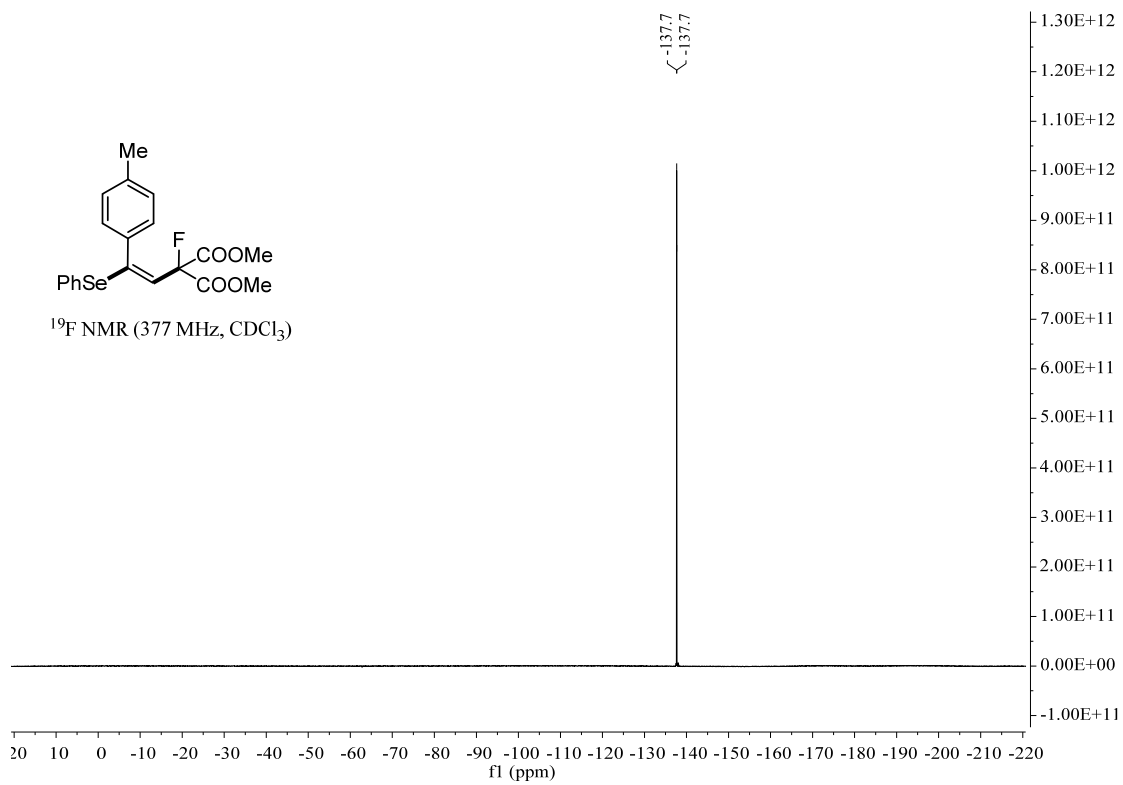

# Compound 9

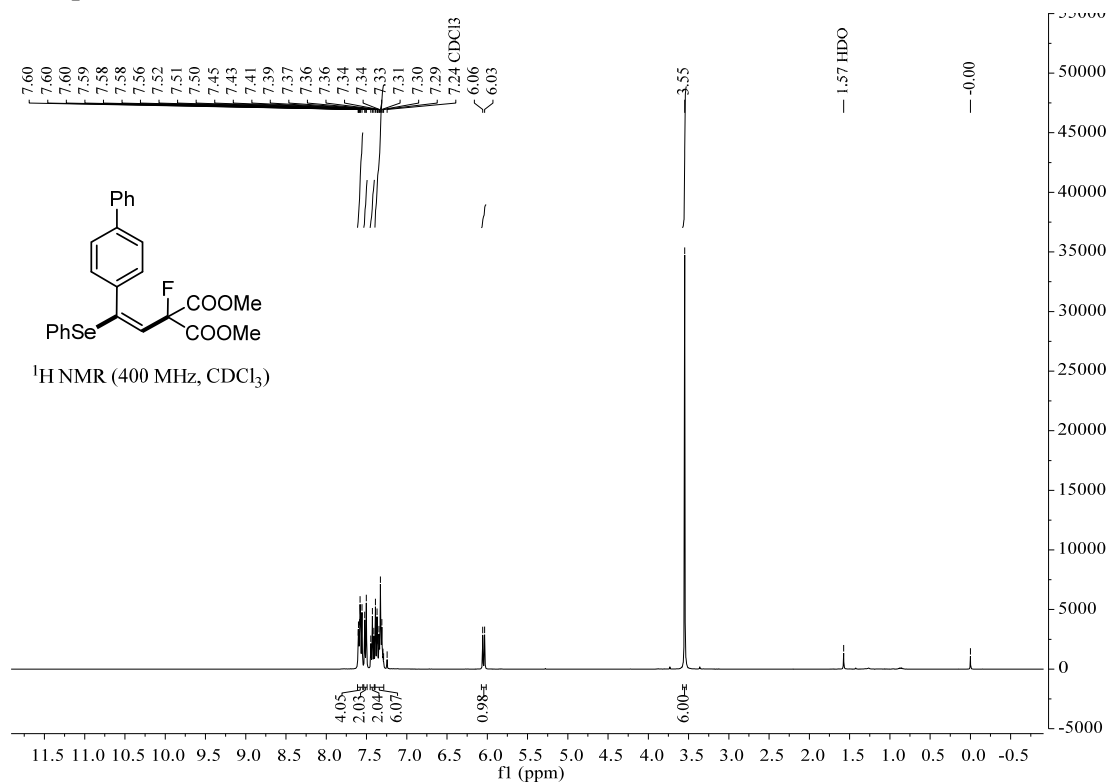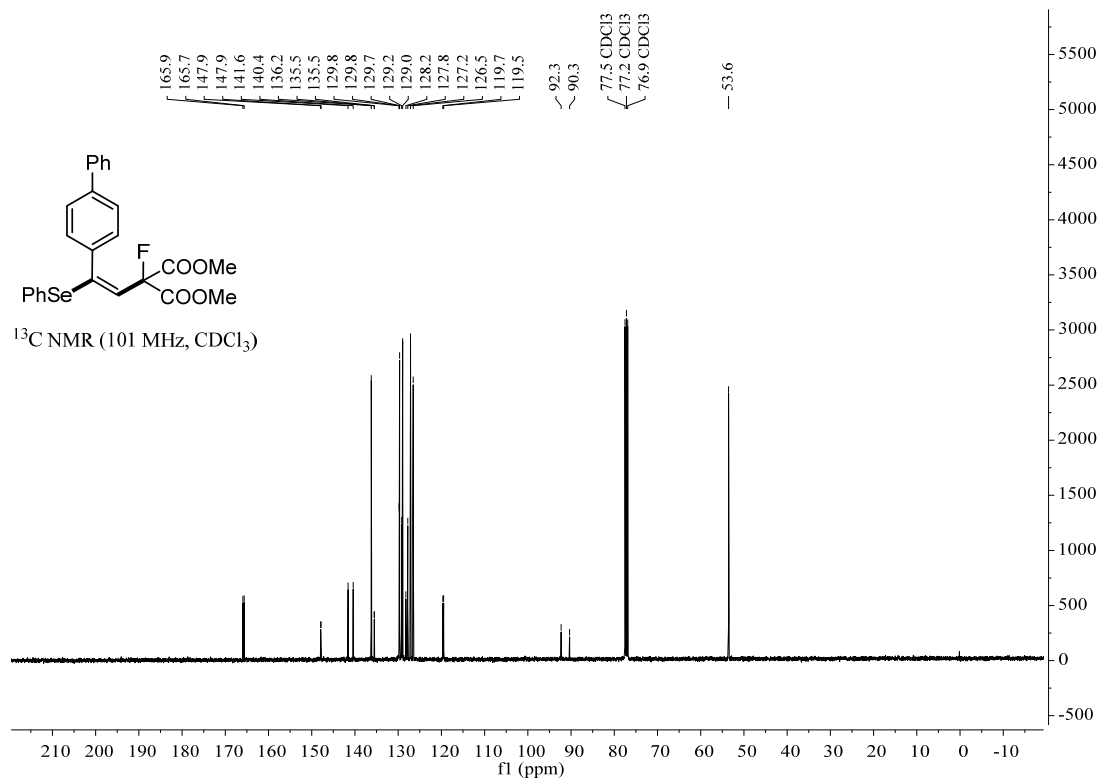

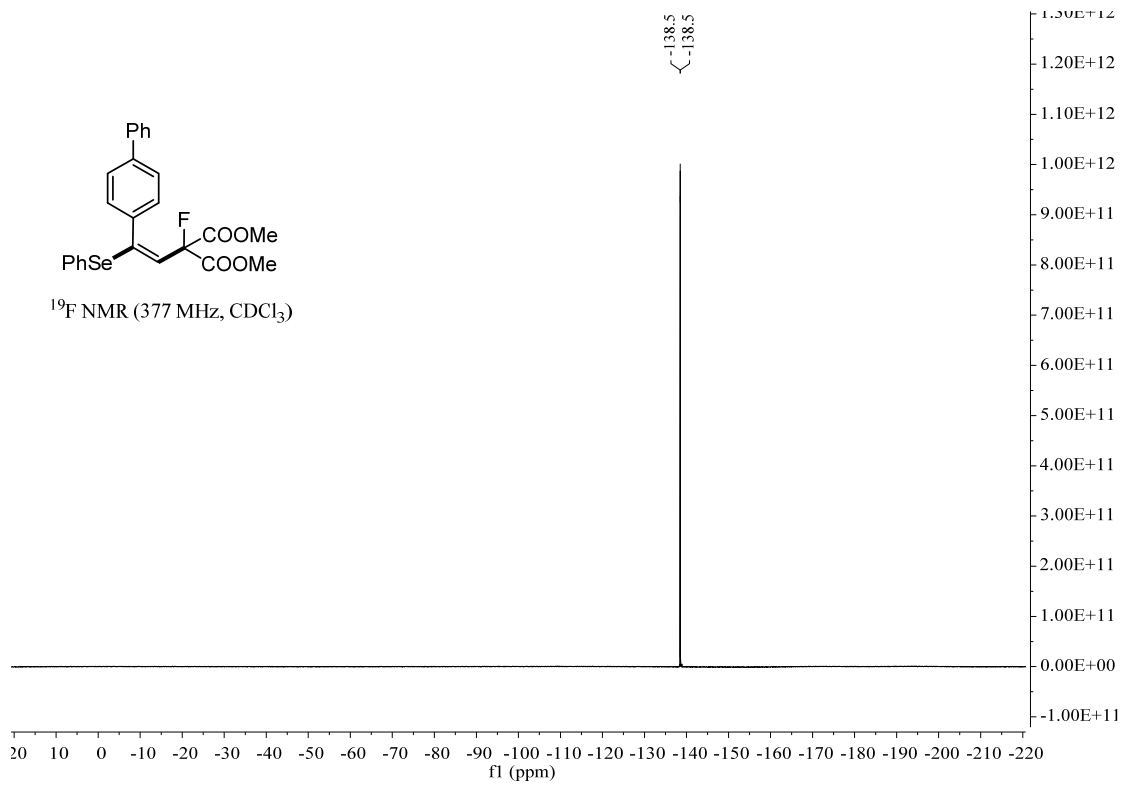

# Compound 10

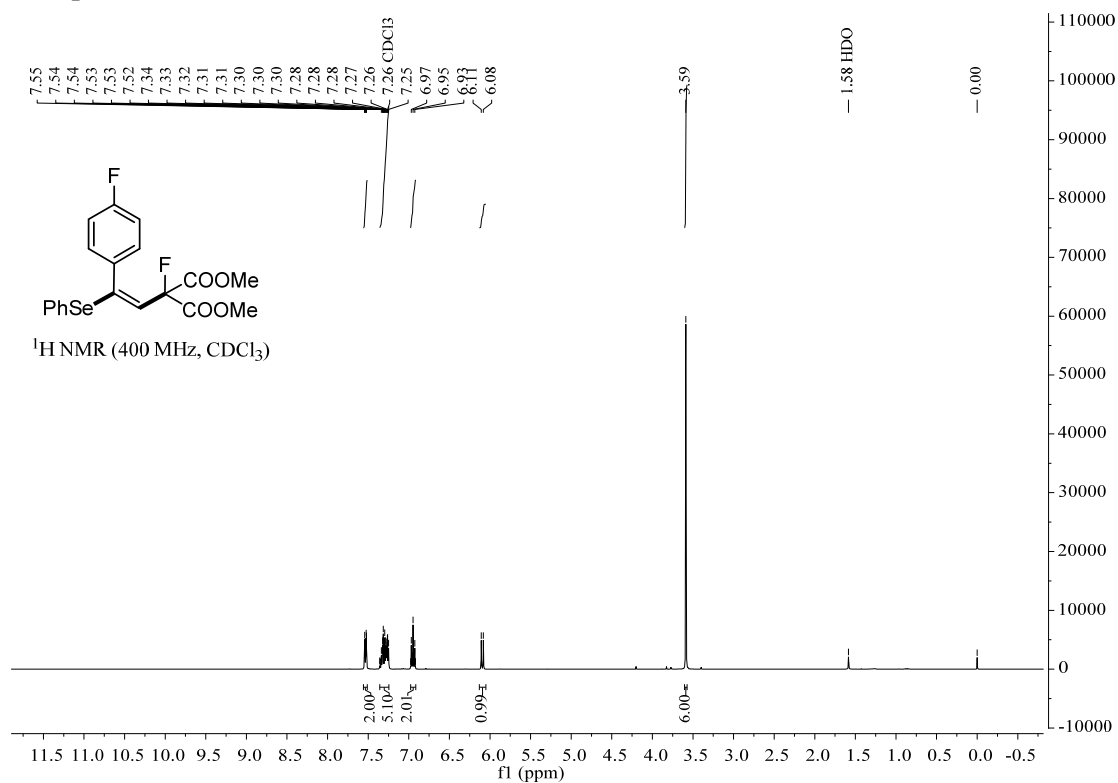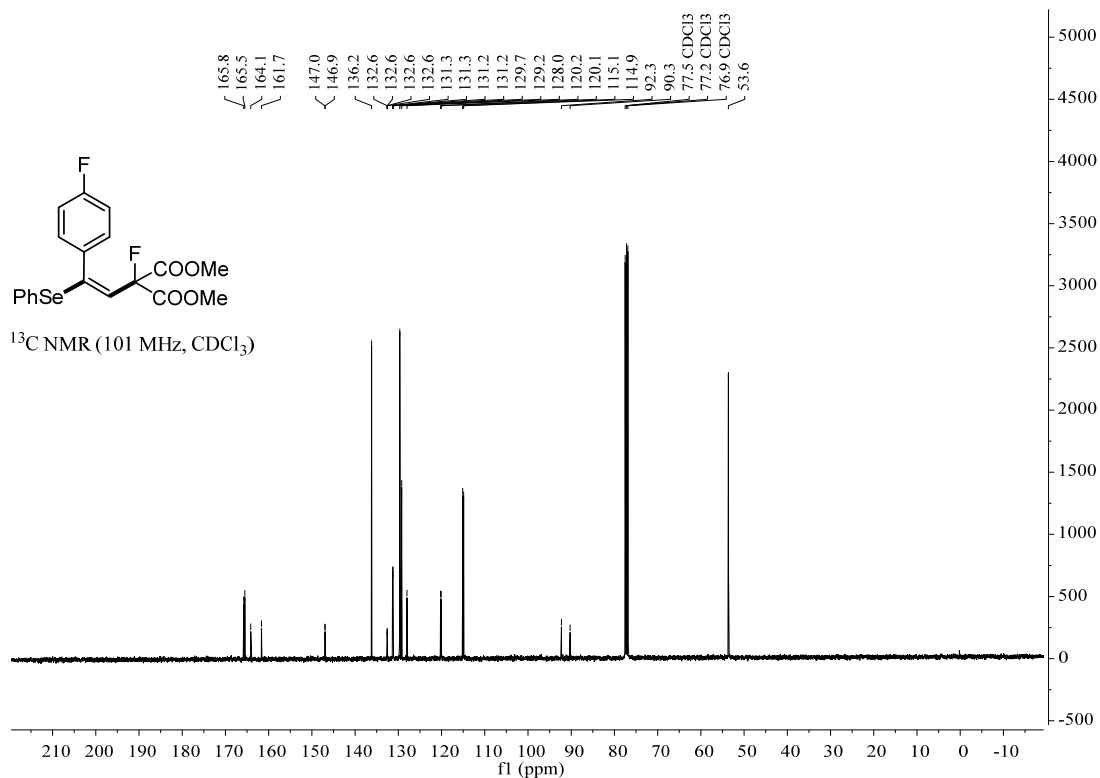

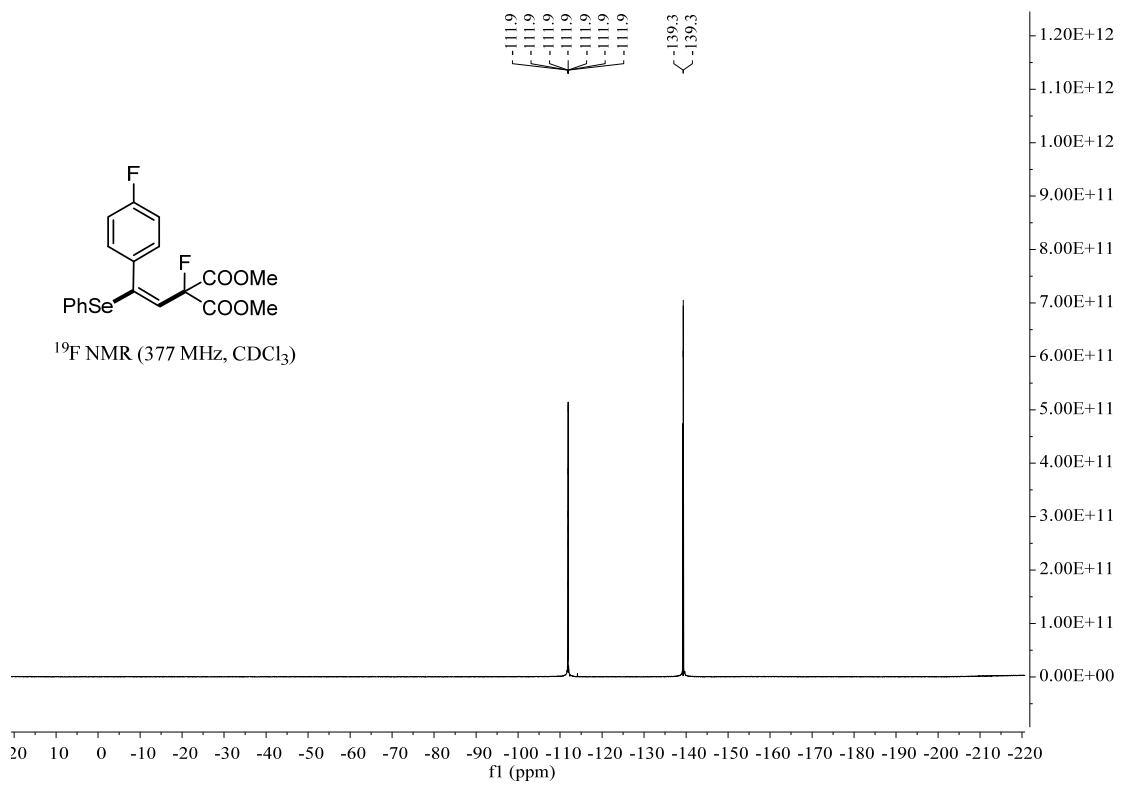

# Compound 11

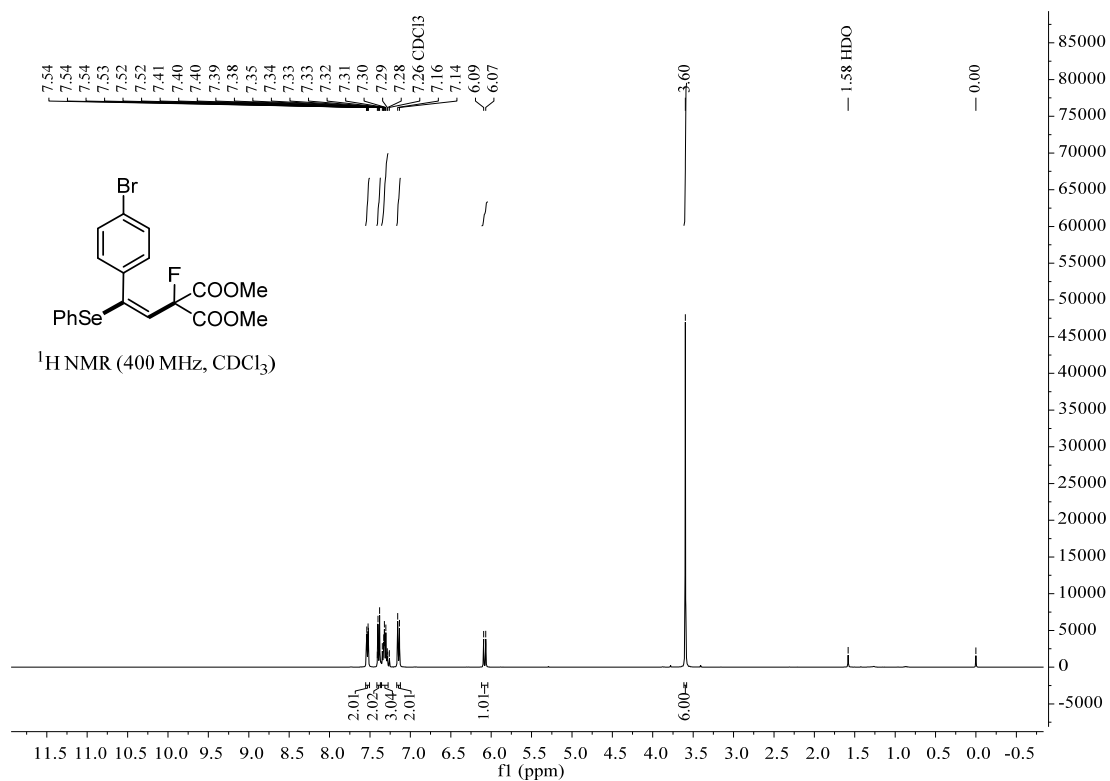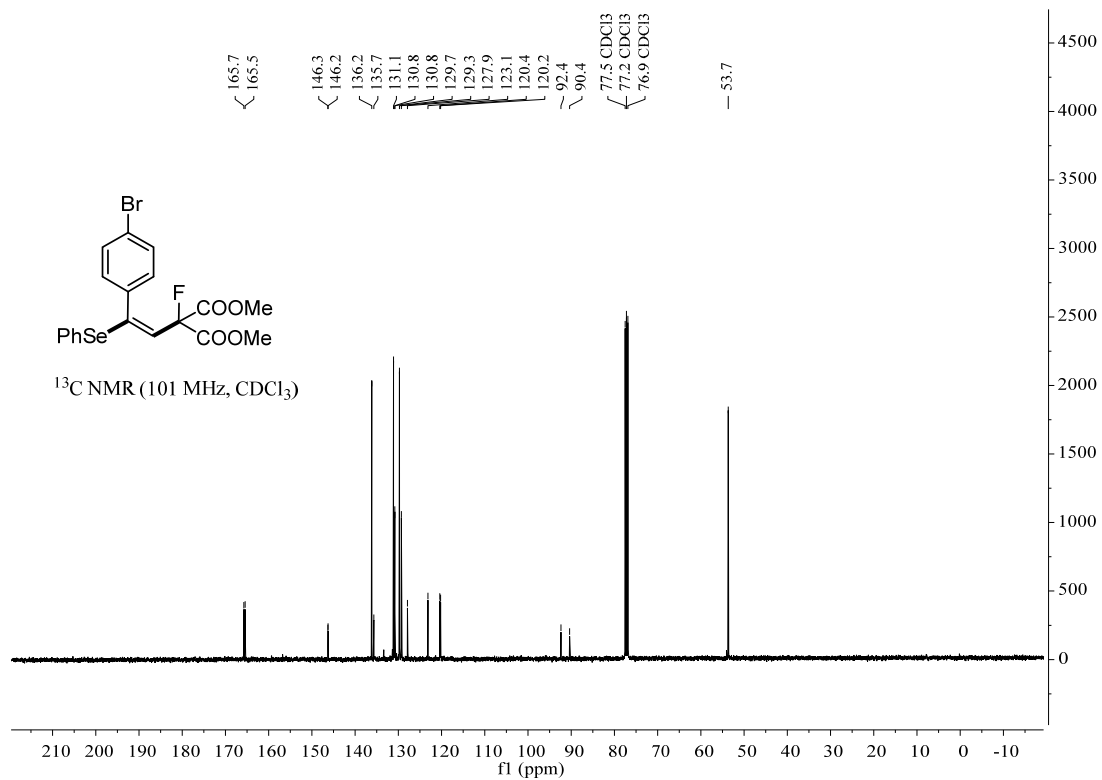

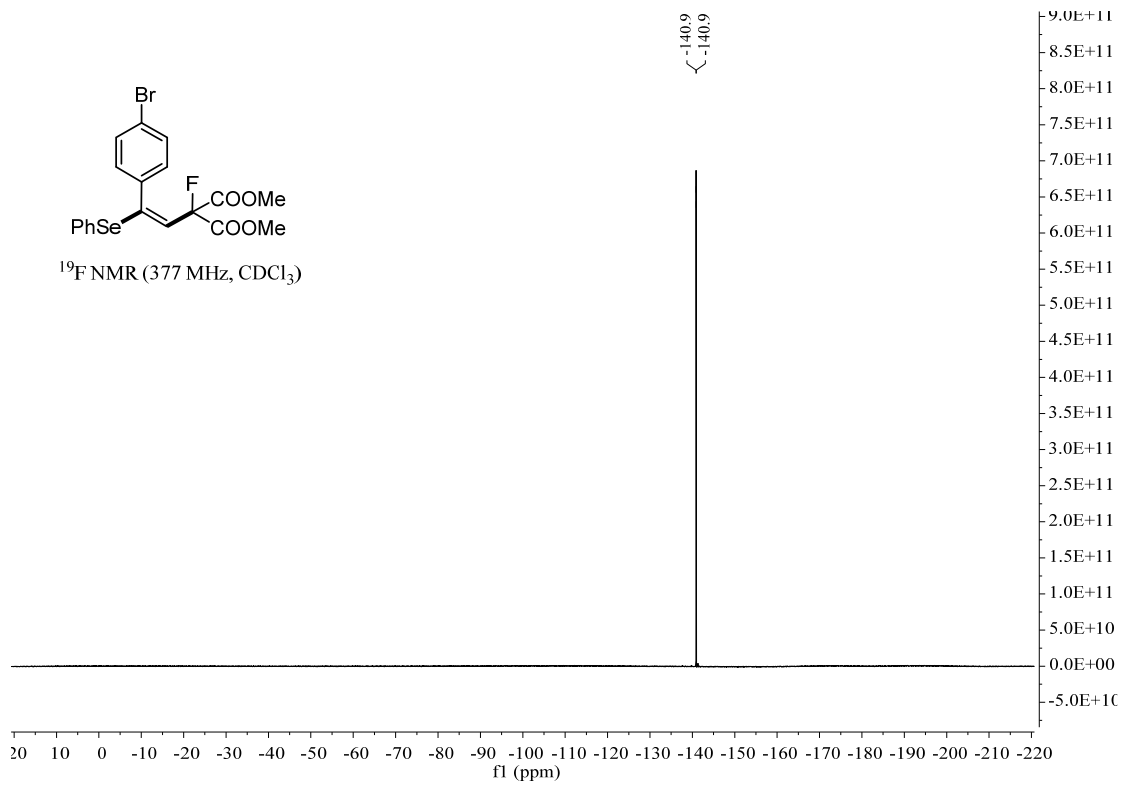

# Compound 12

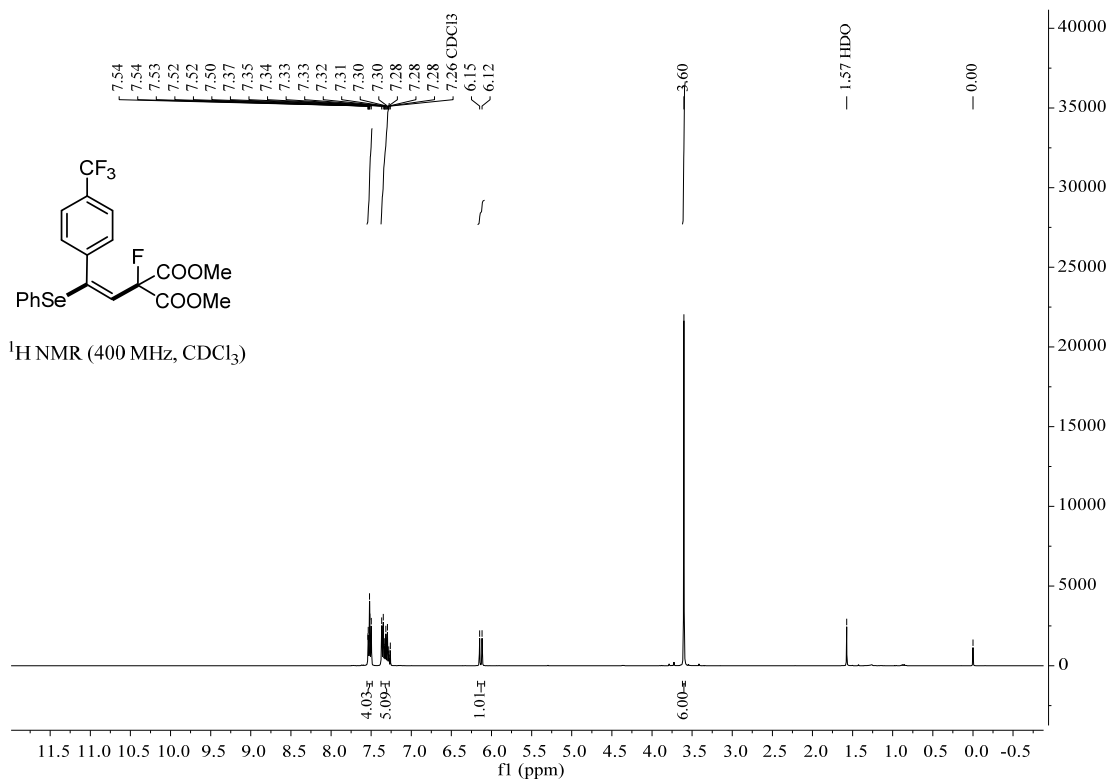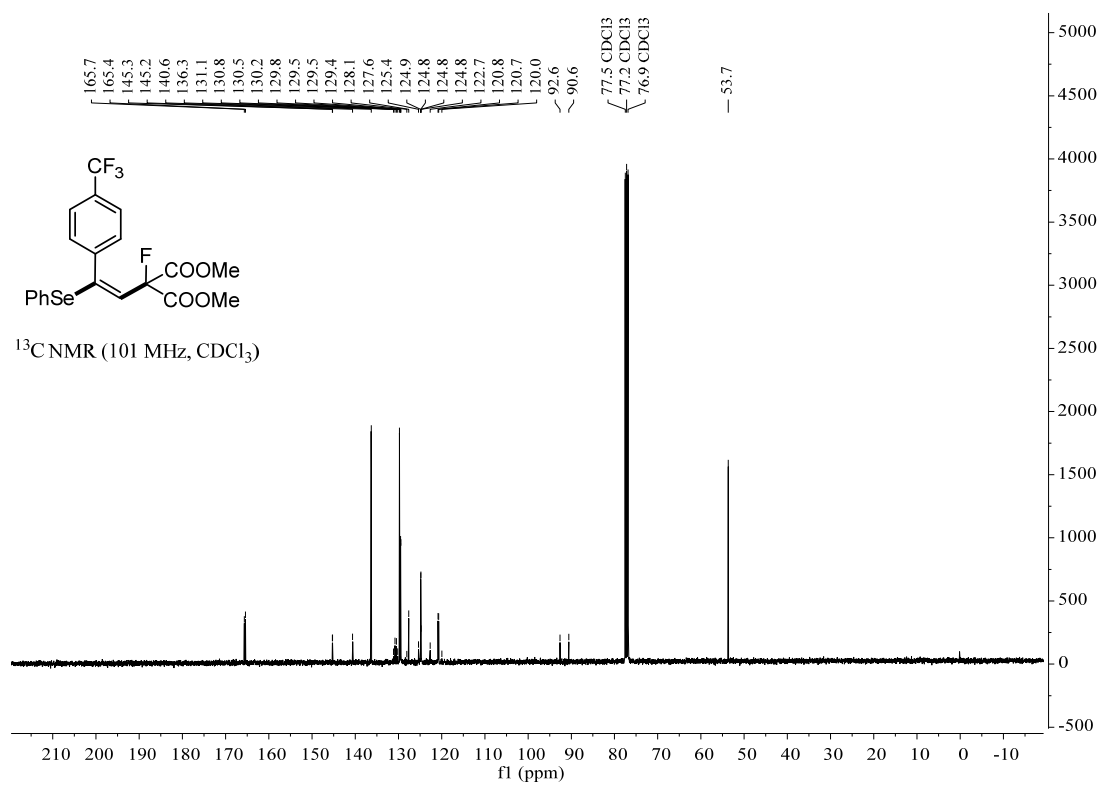



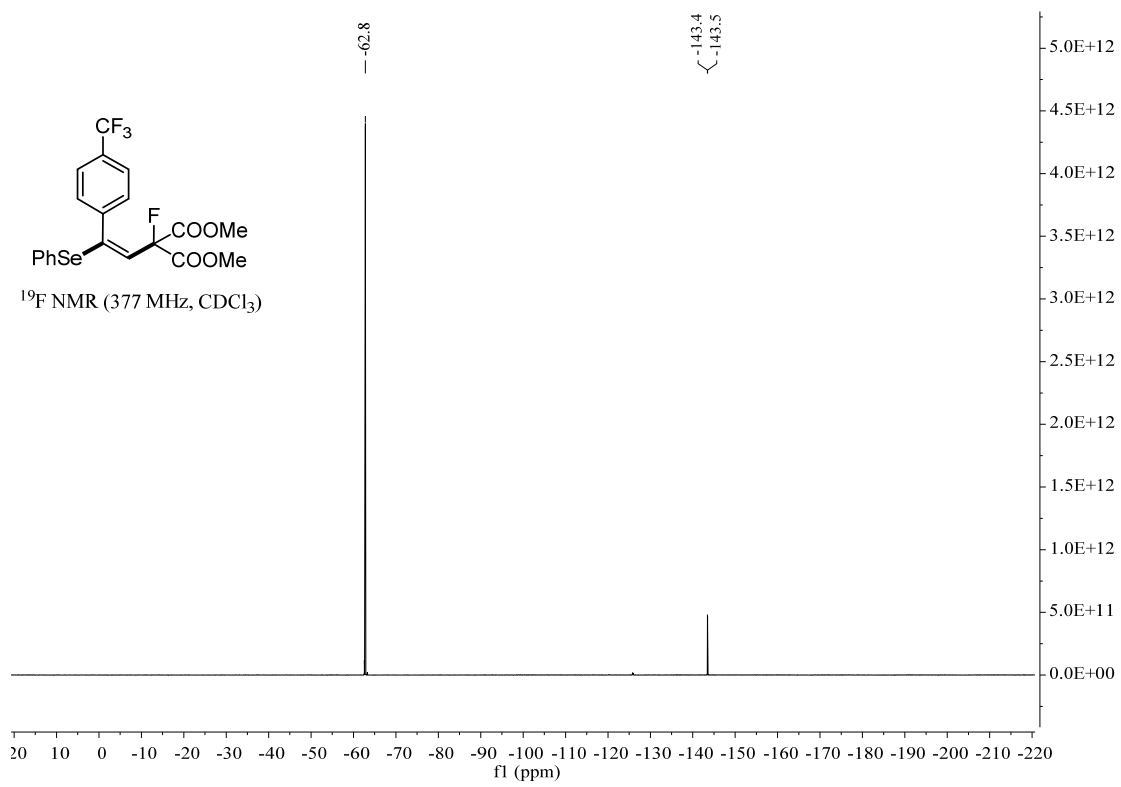

# Compound 13

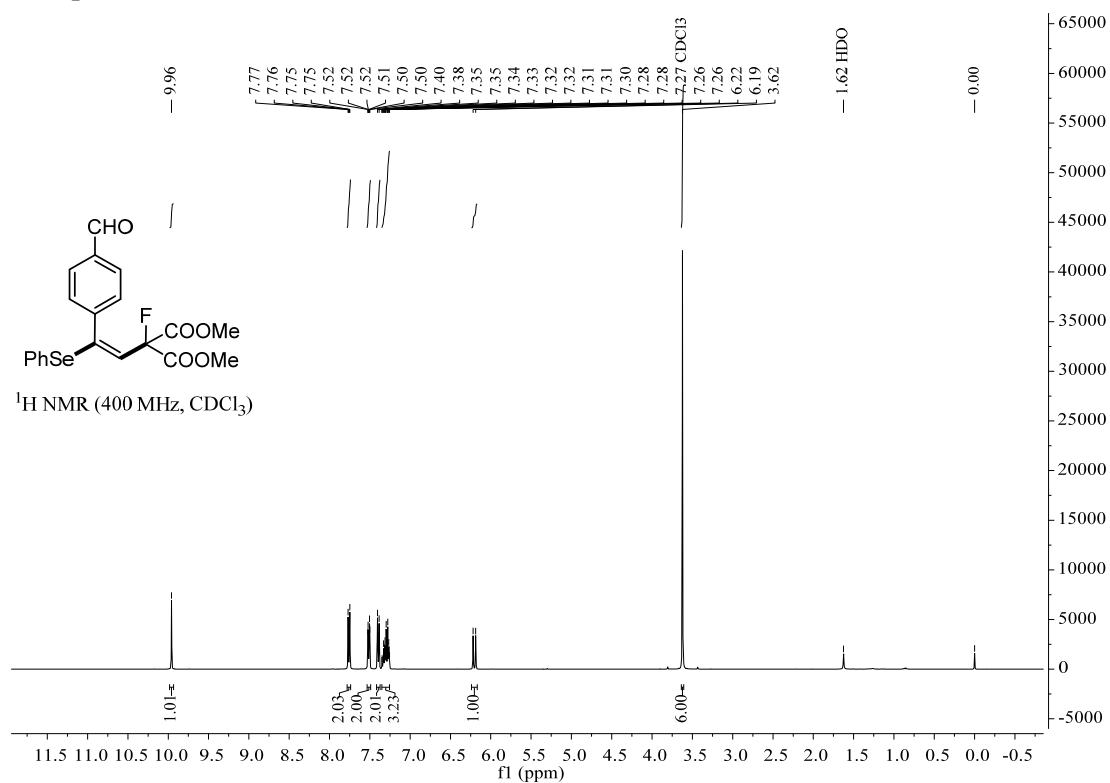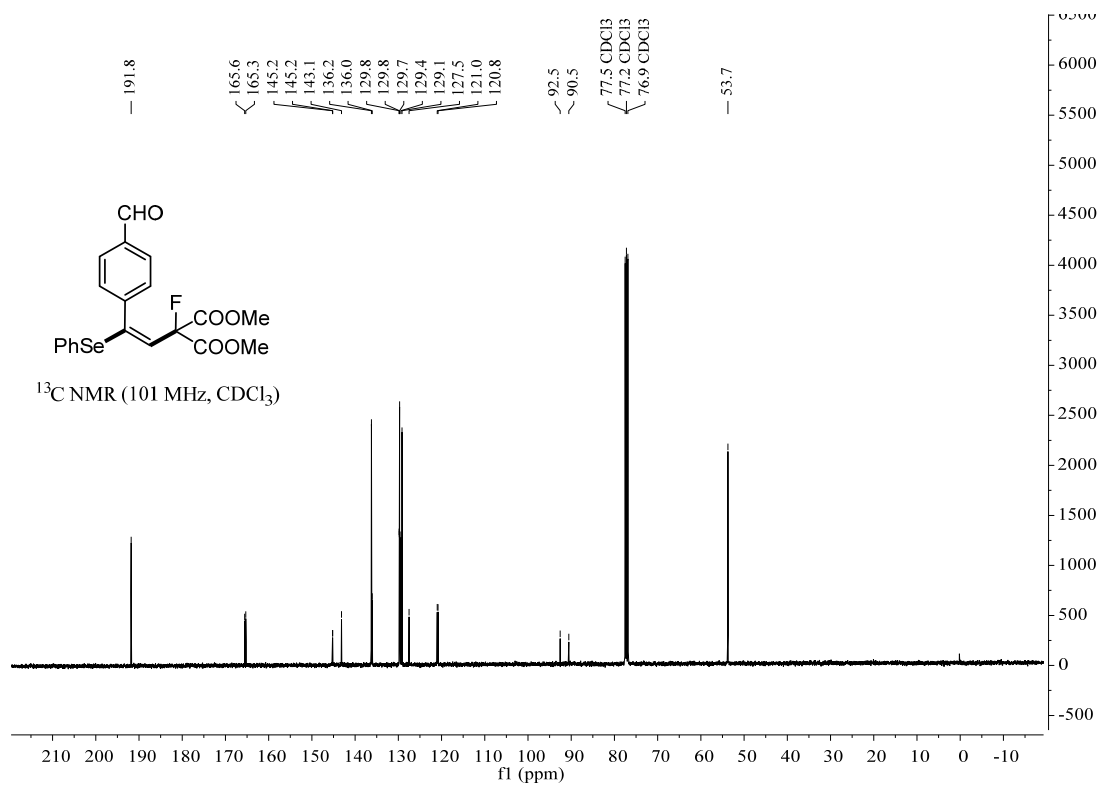

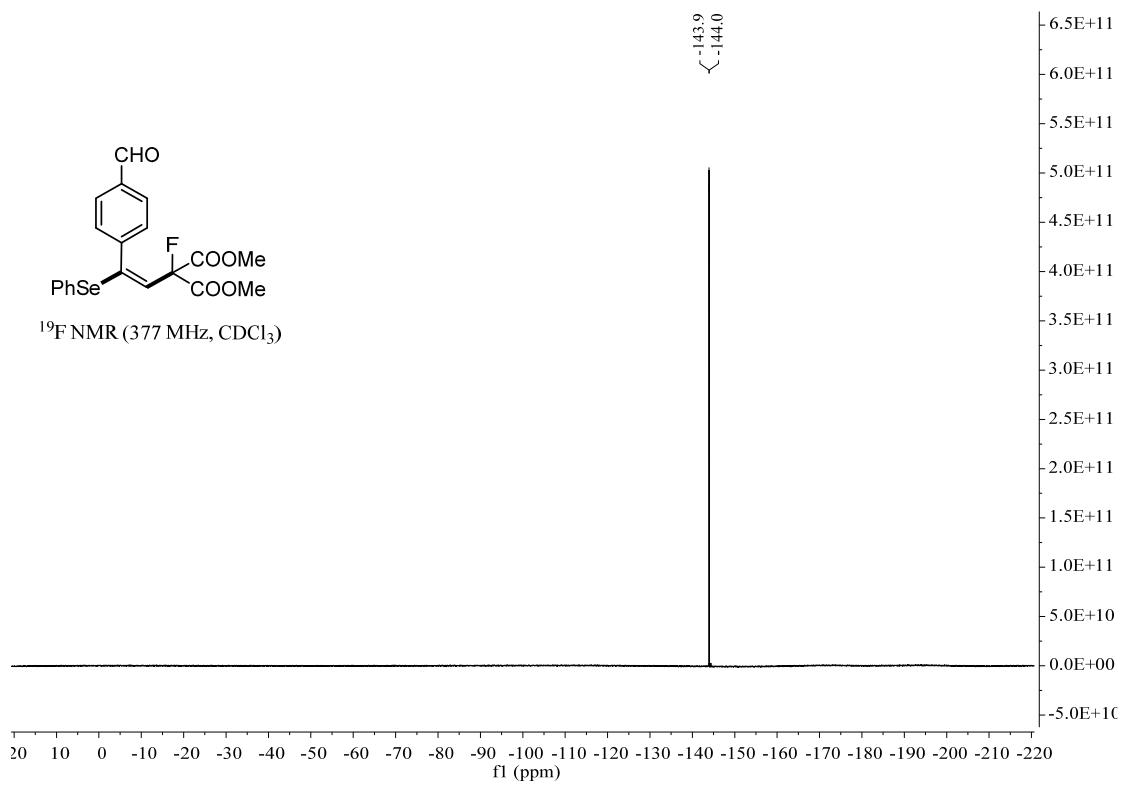

# Compound 14

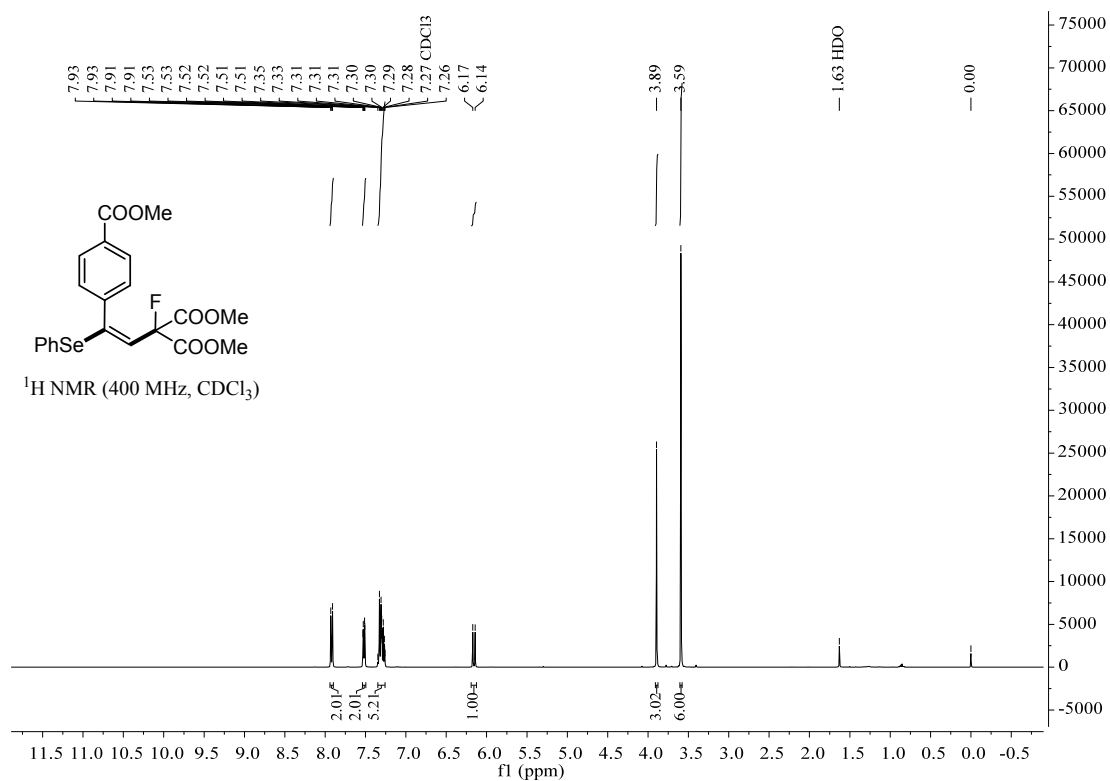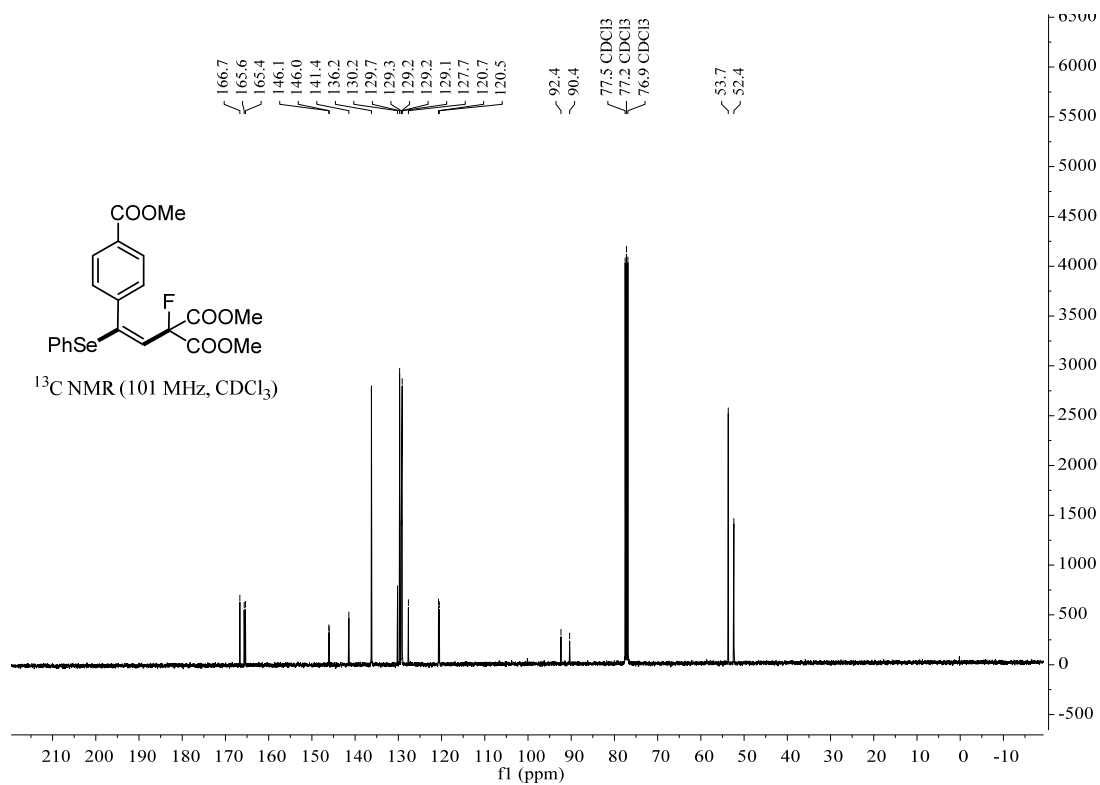

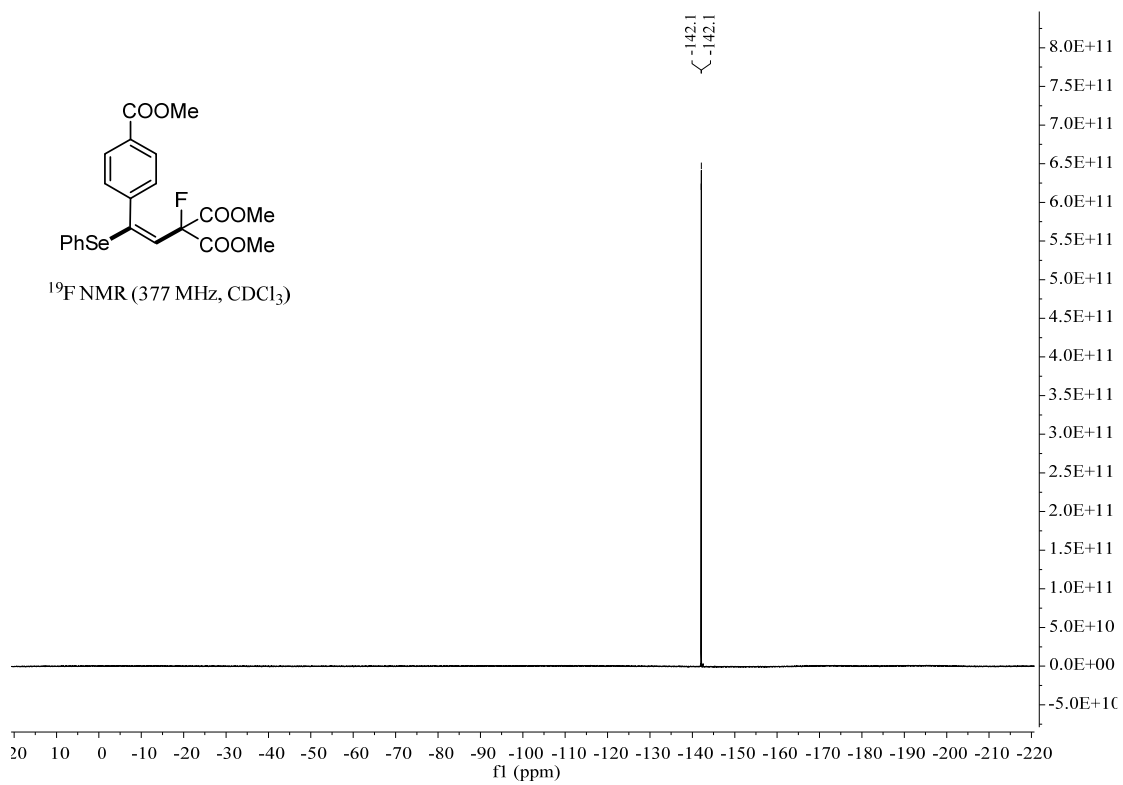

# Compound 15

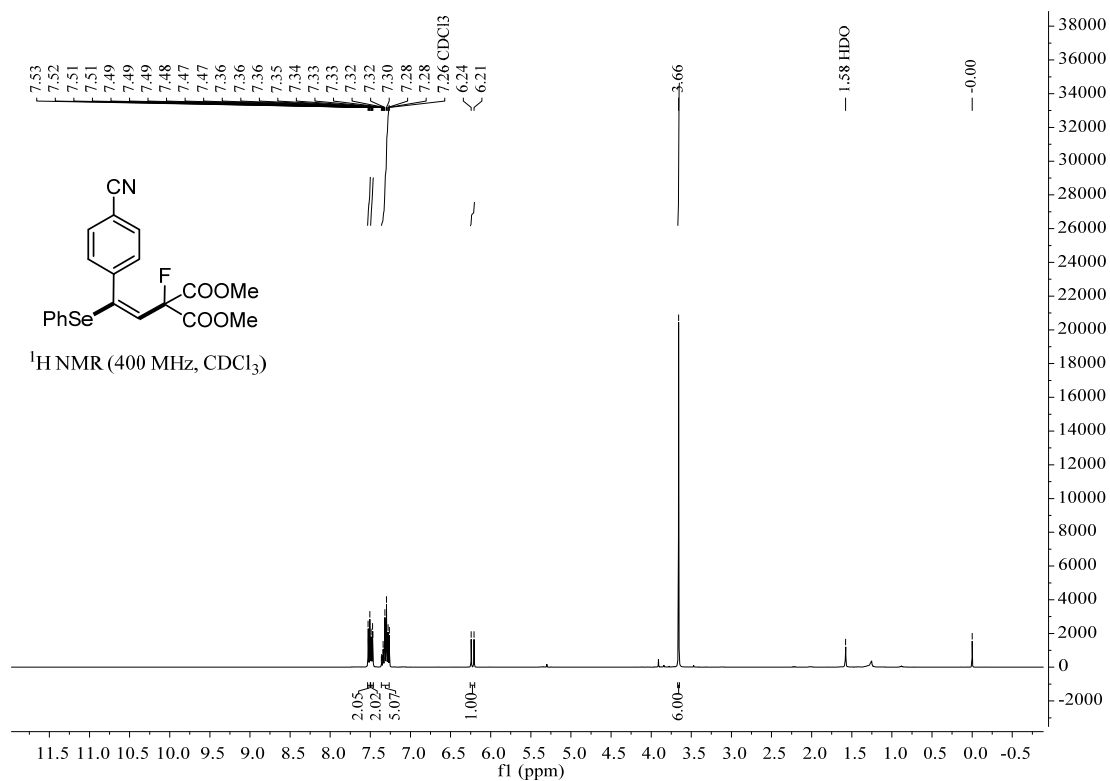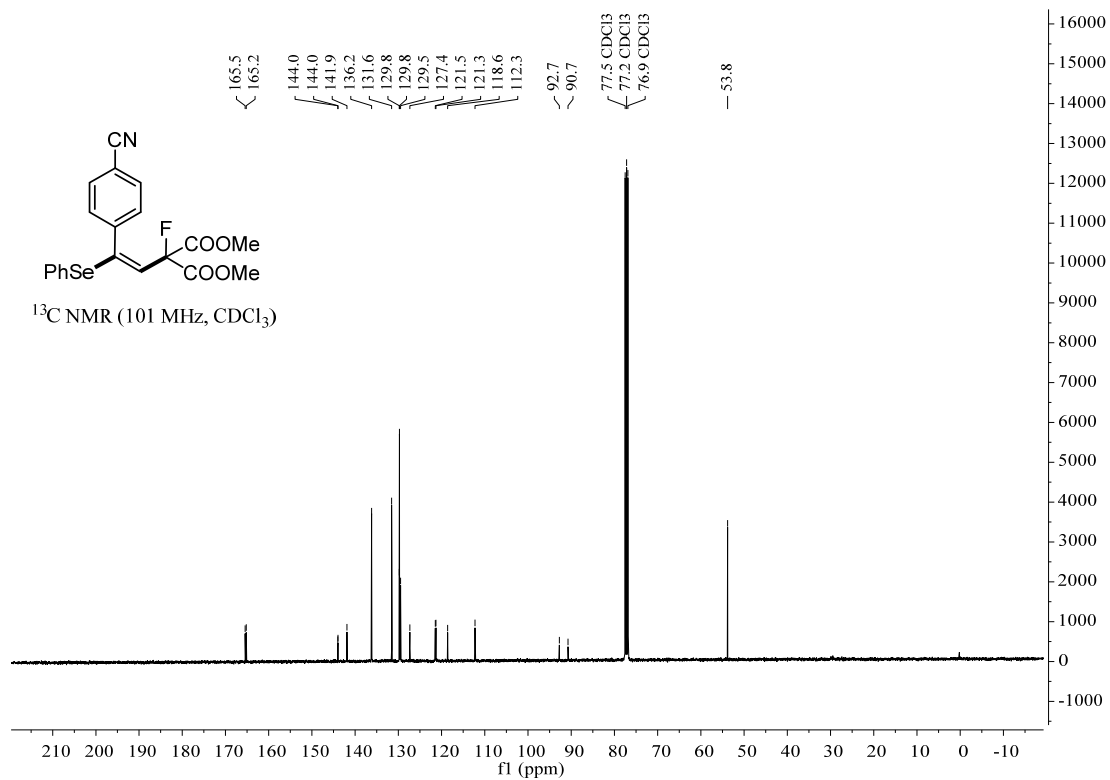

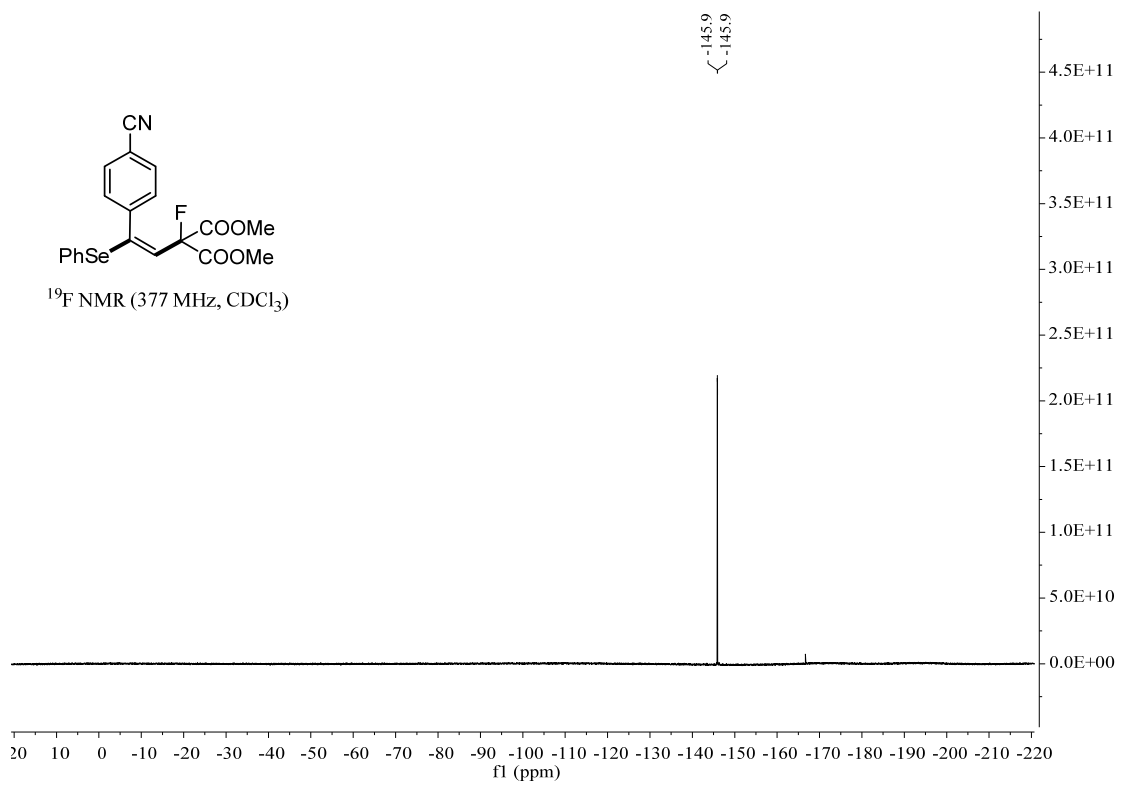

# Compound 16

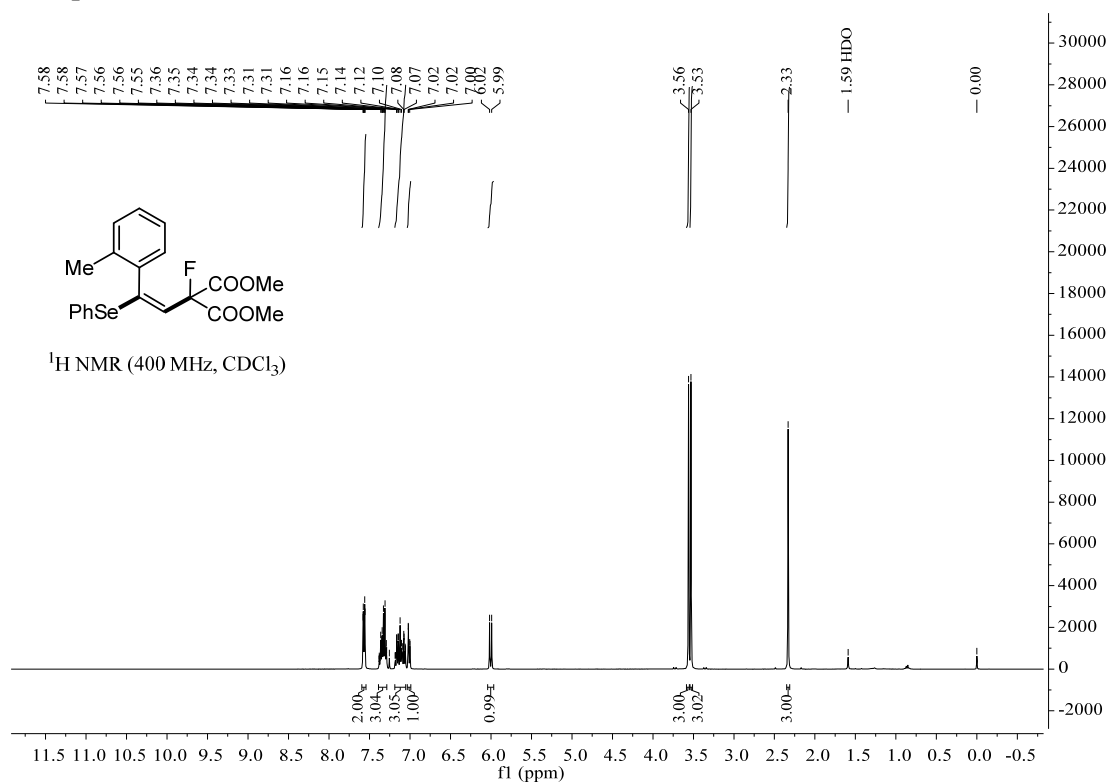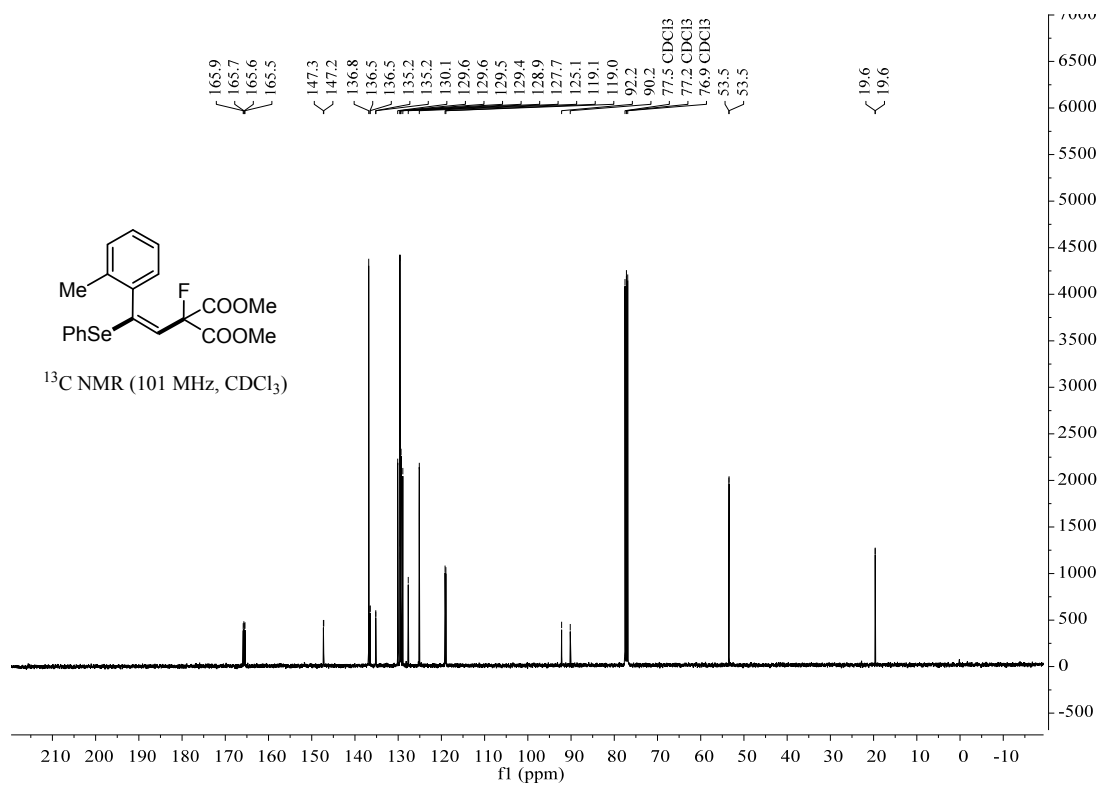



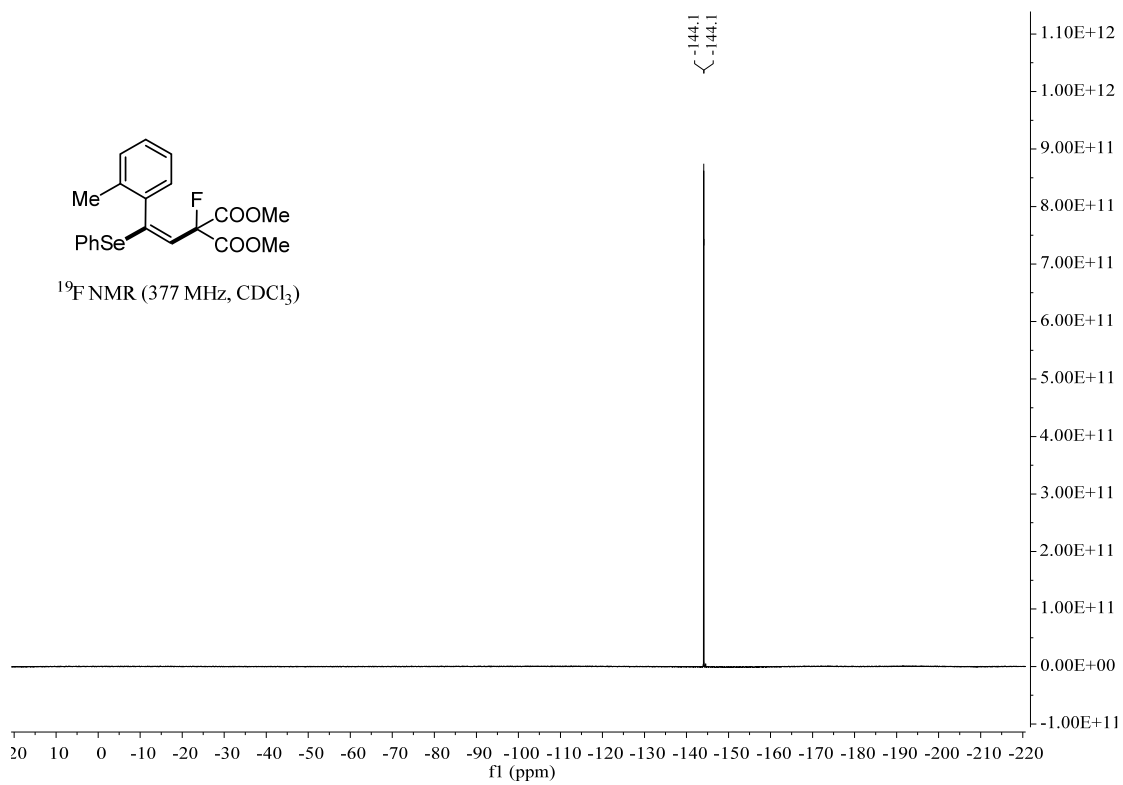

# Compound 17

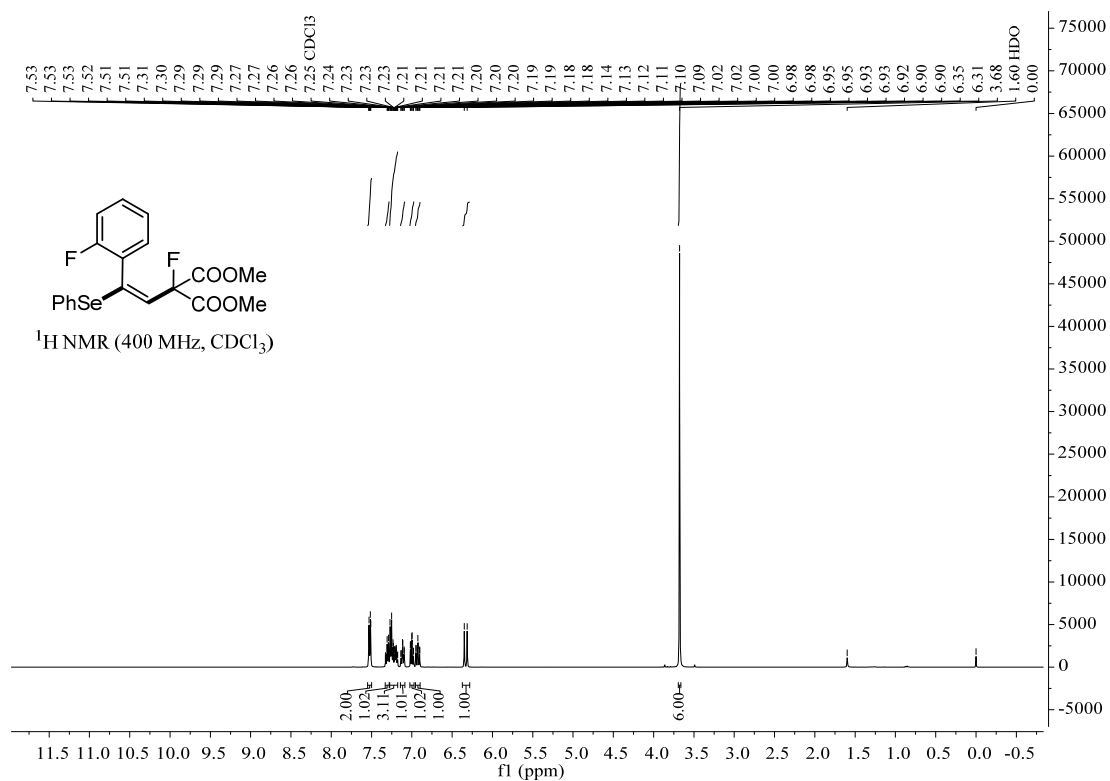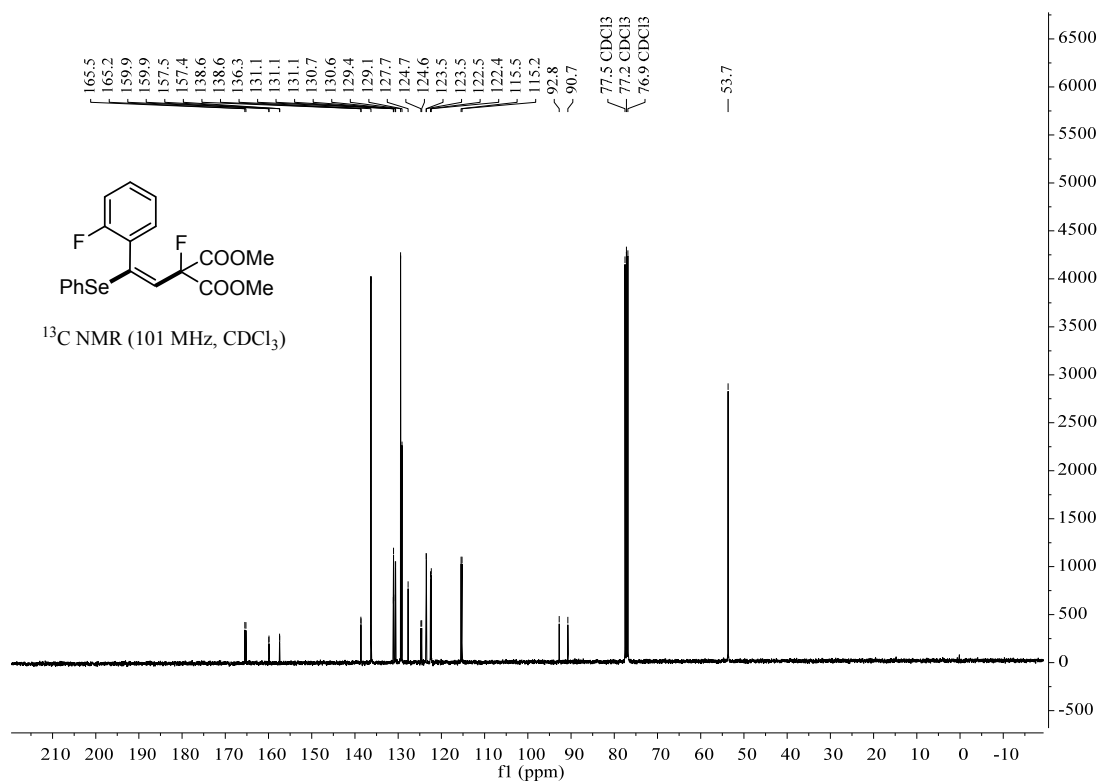

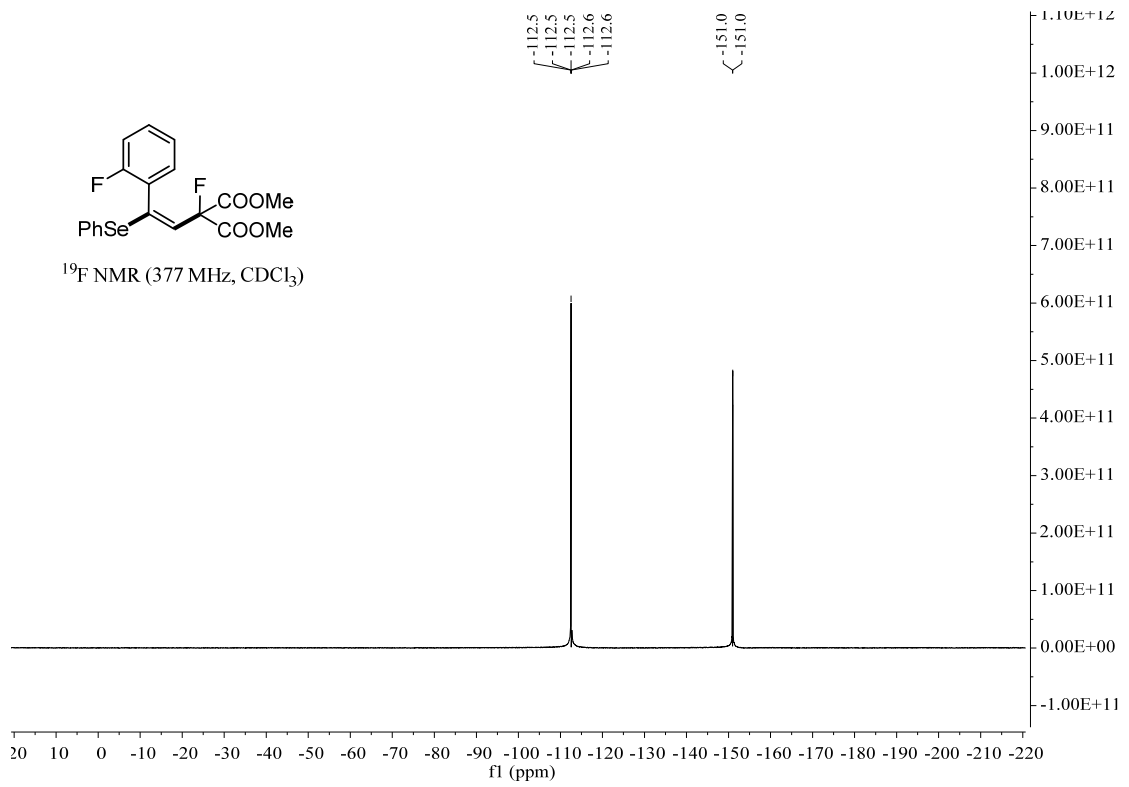

# Compound 18

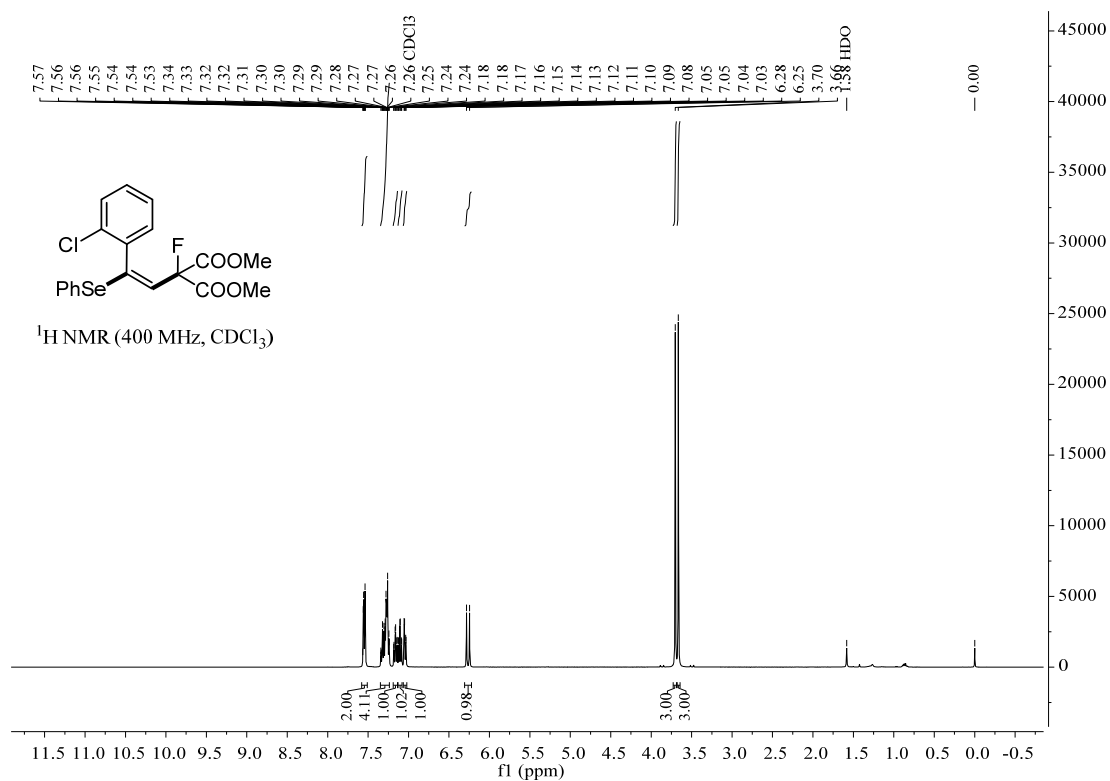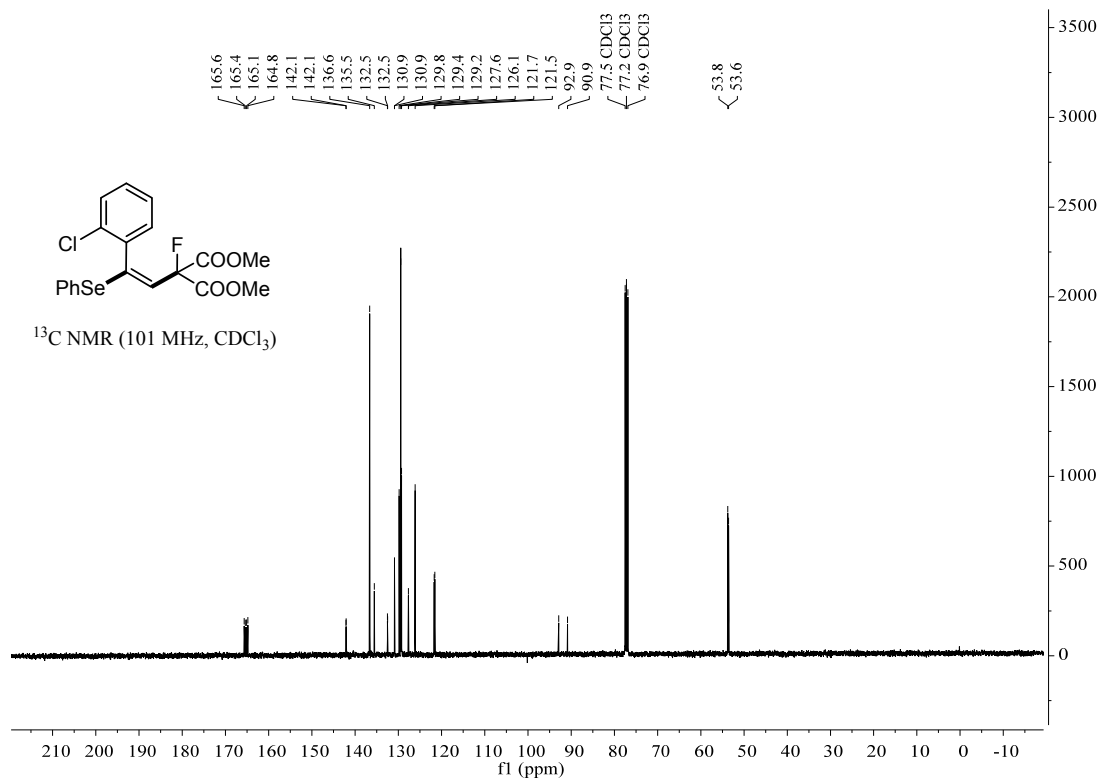

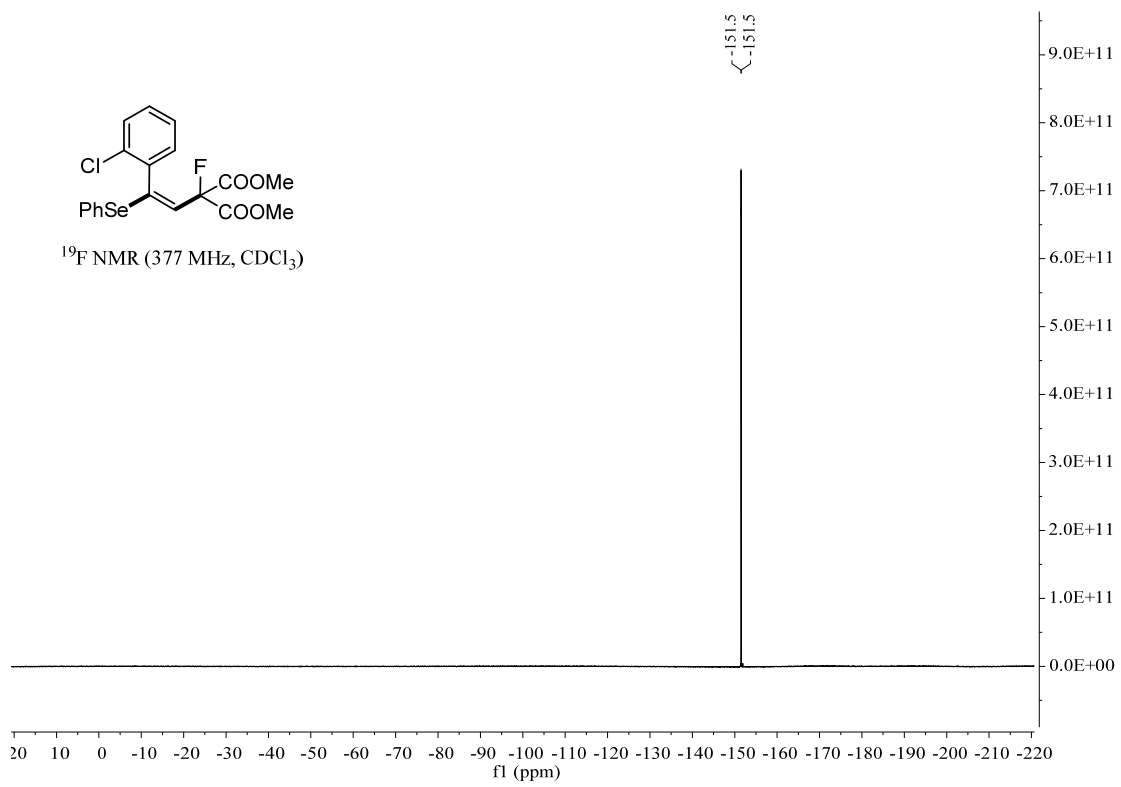

# Compound 19

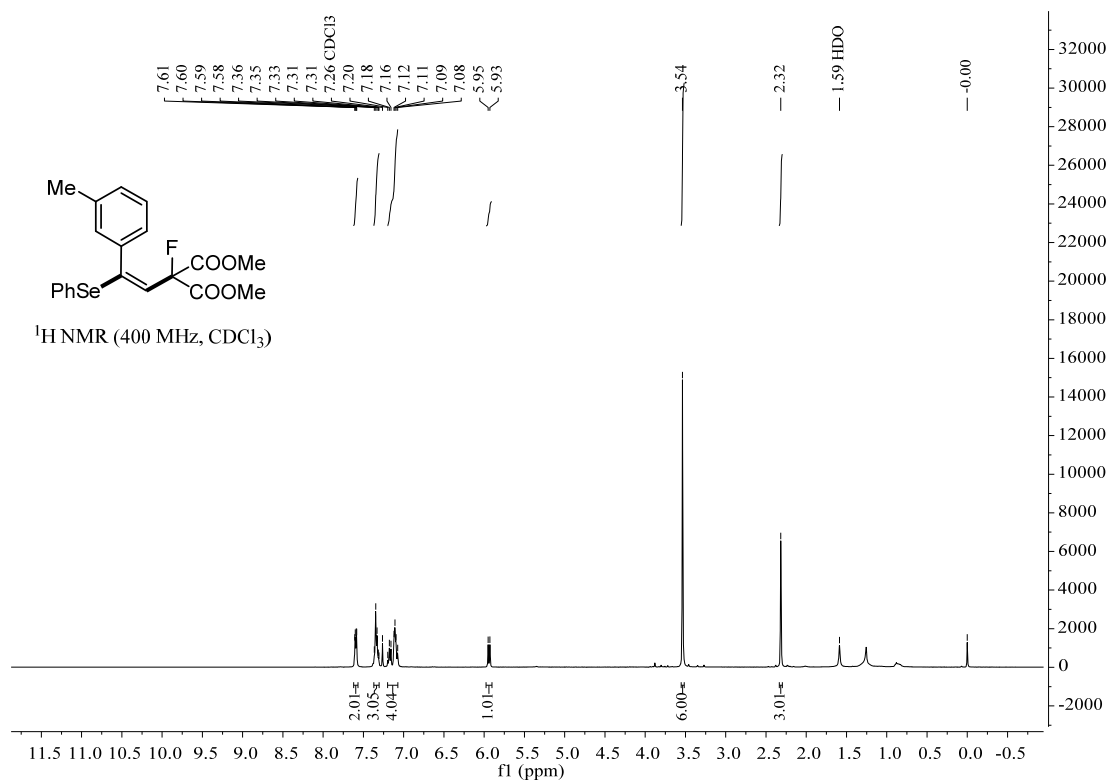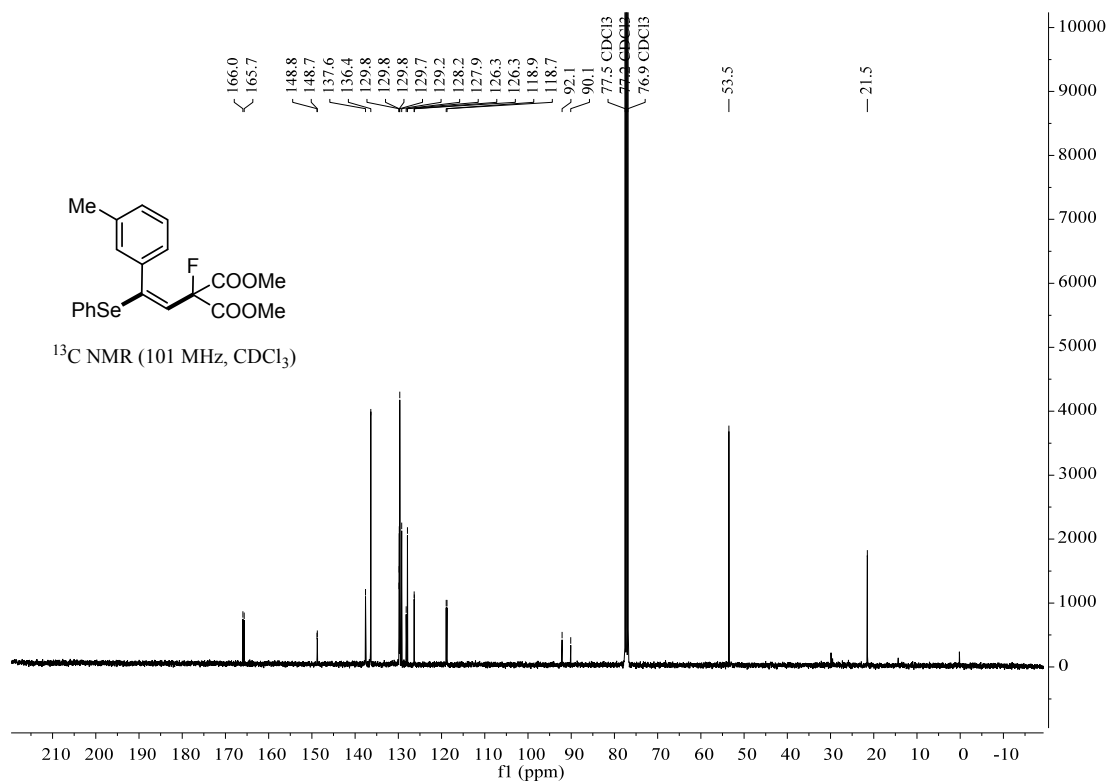

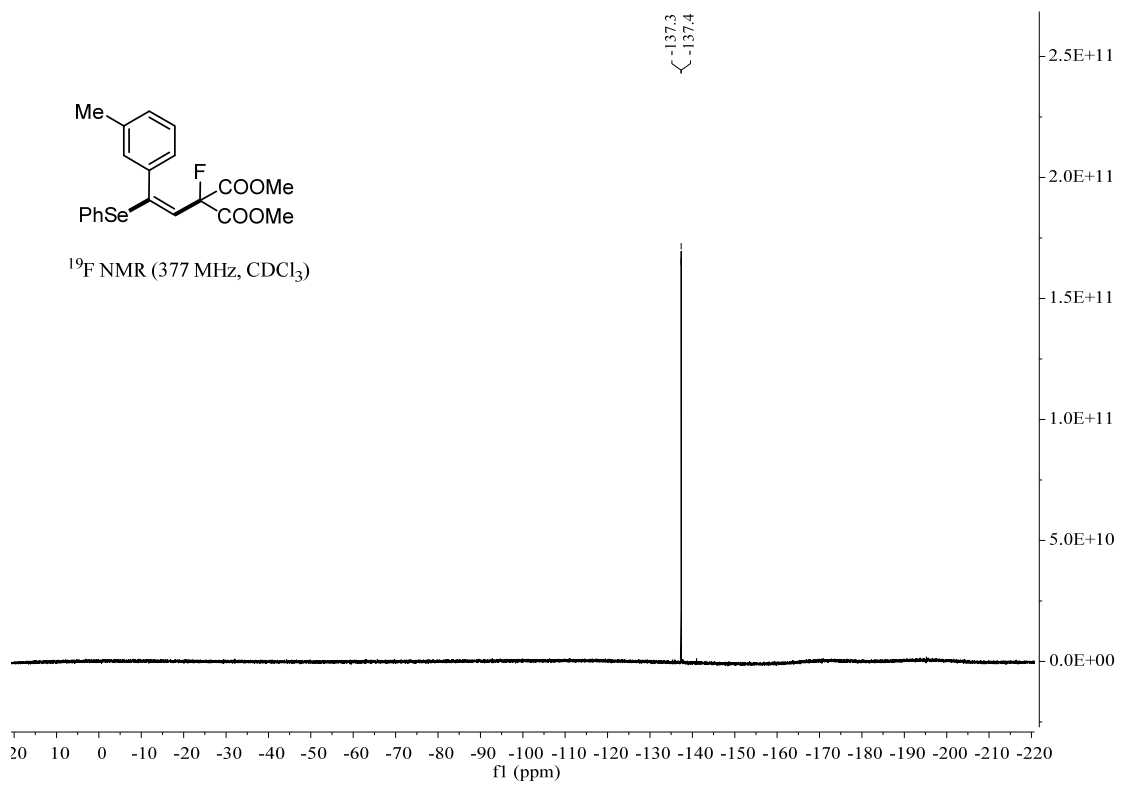

### Compound 20

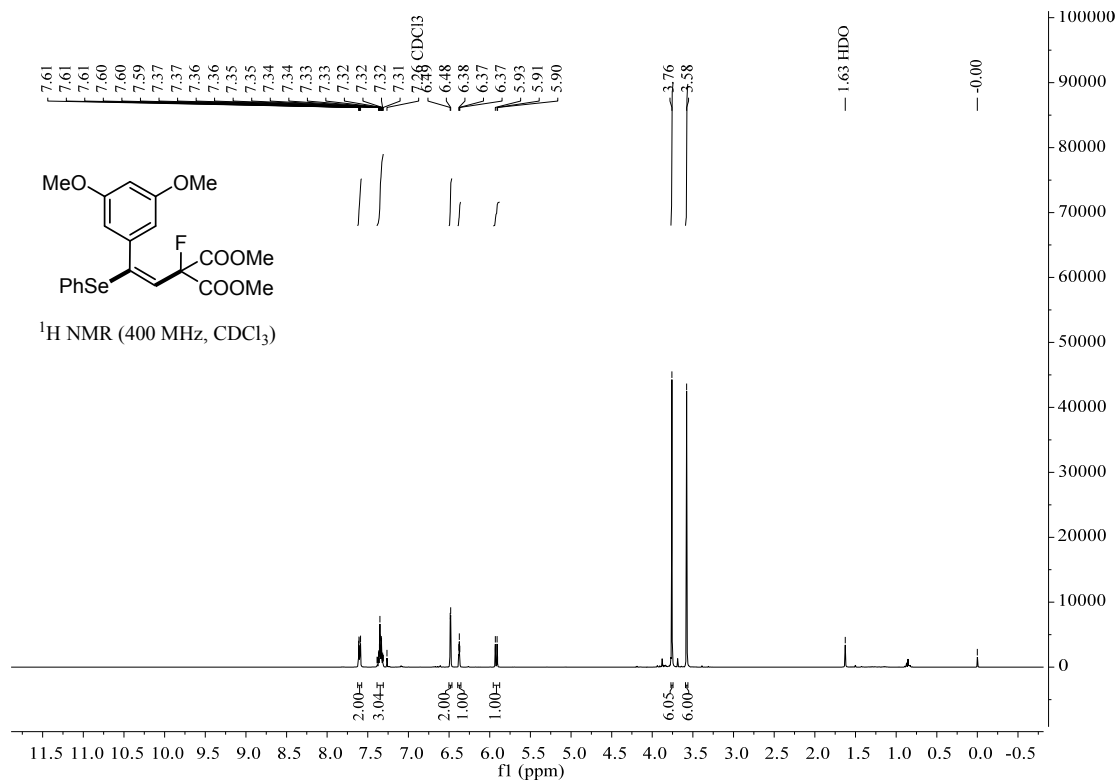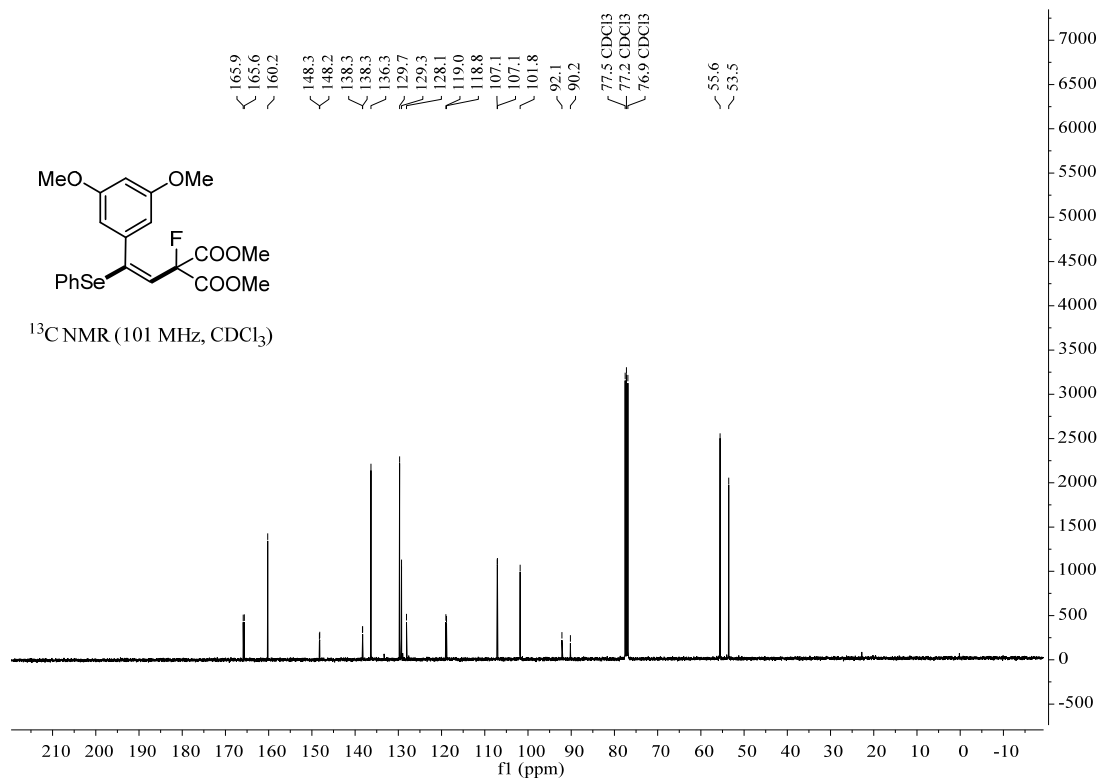



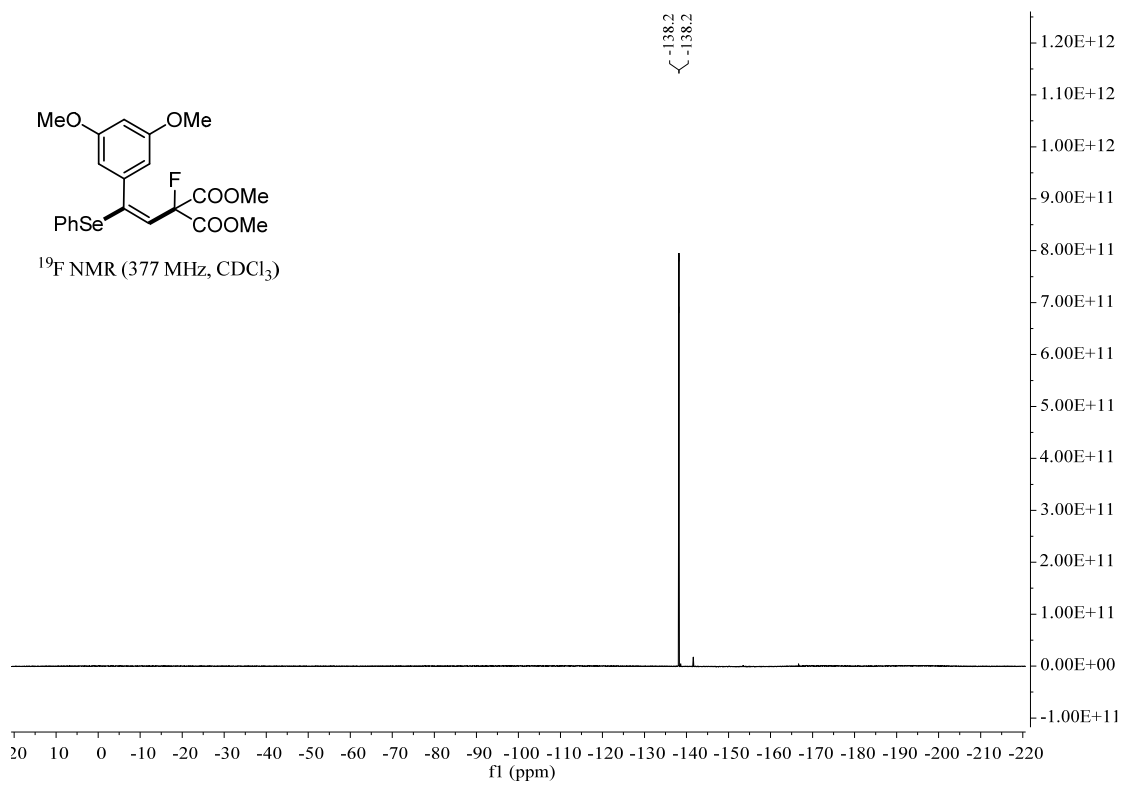

# Compound 21

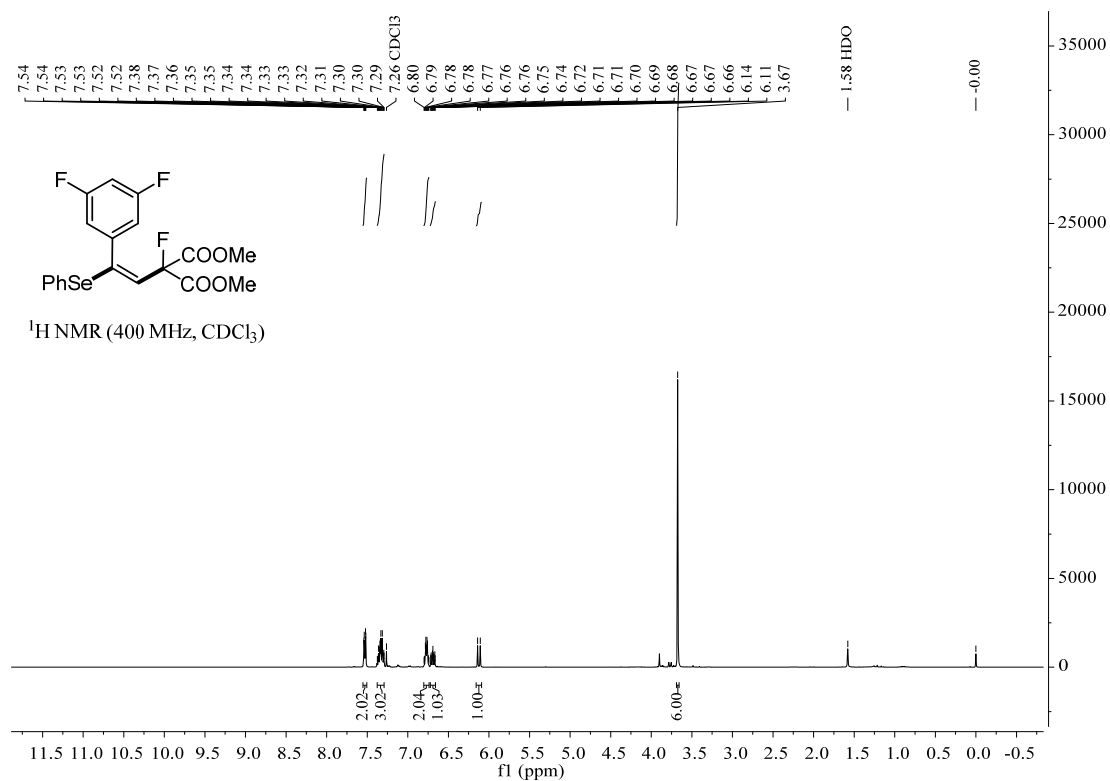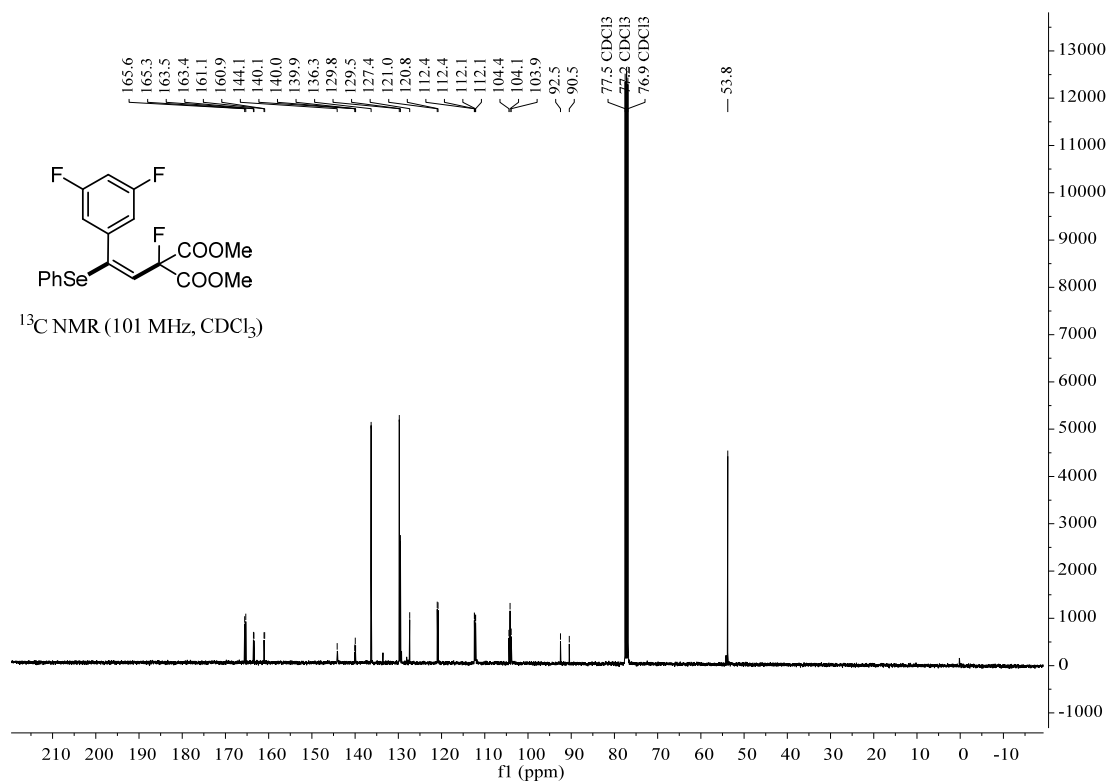

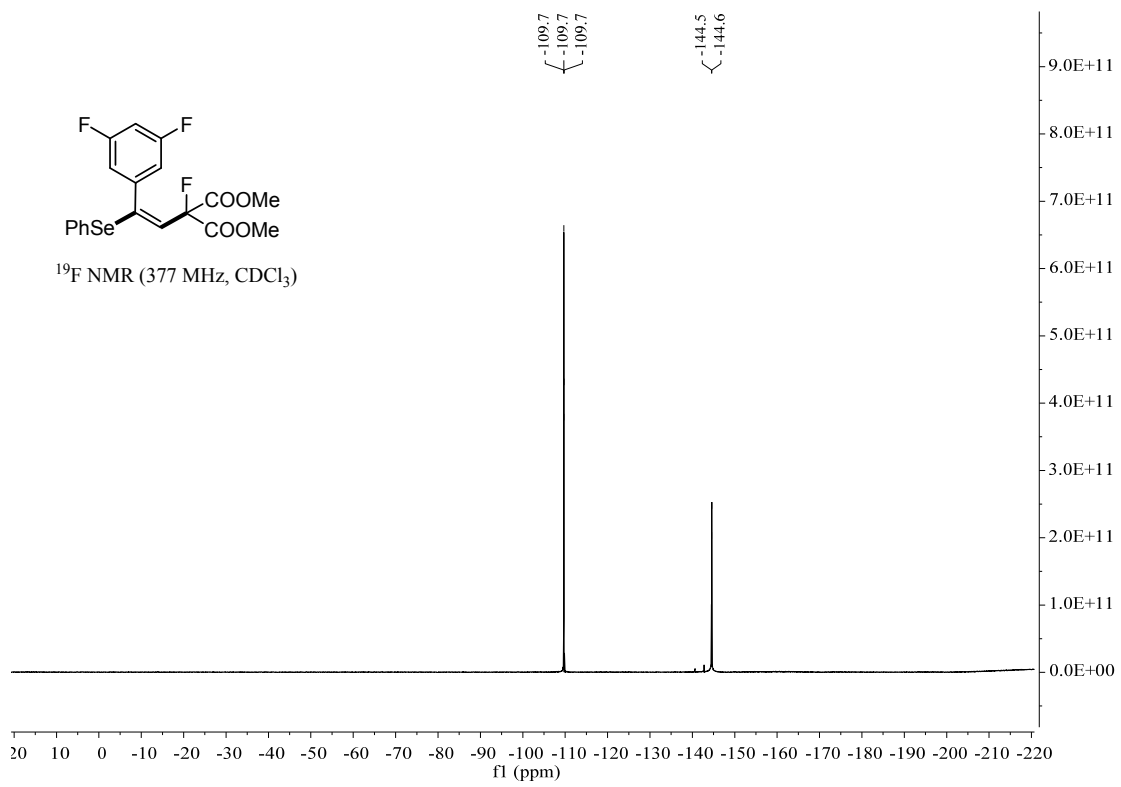

# Compound 22

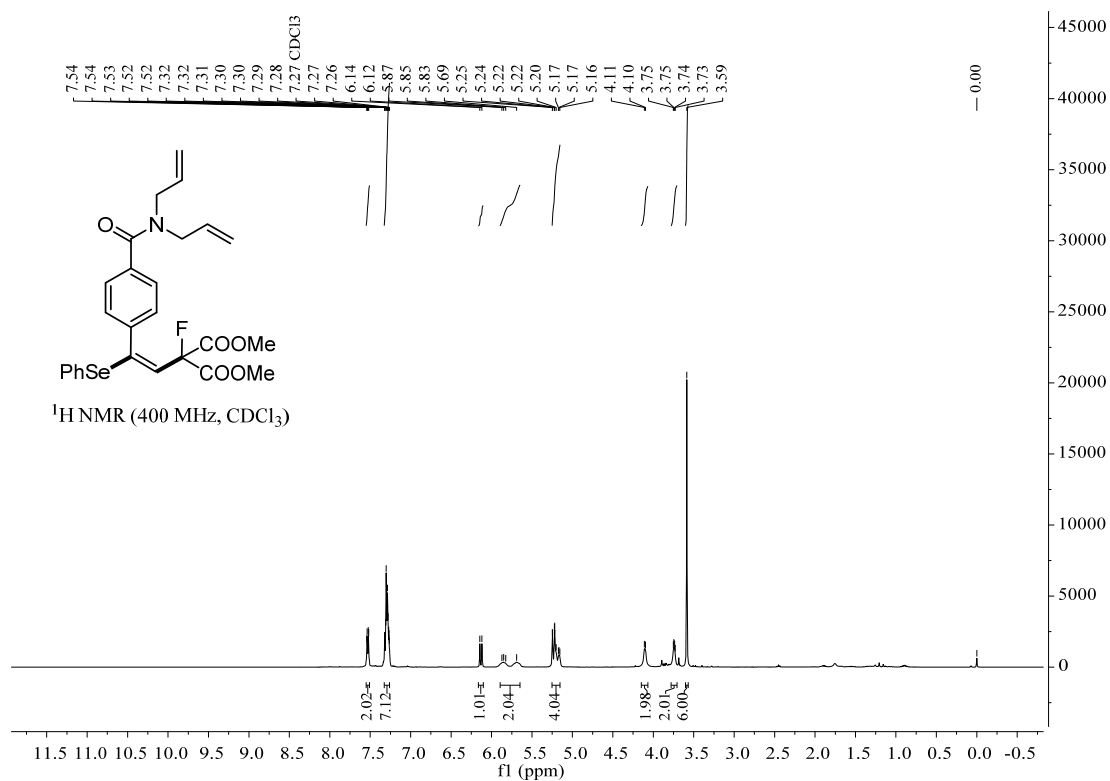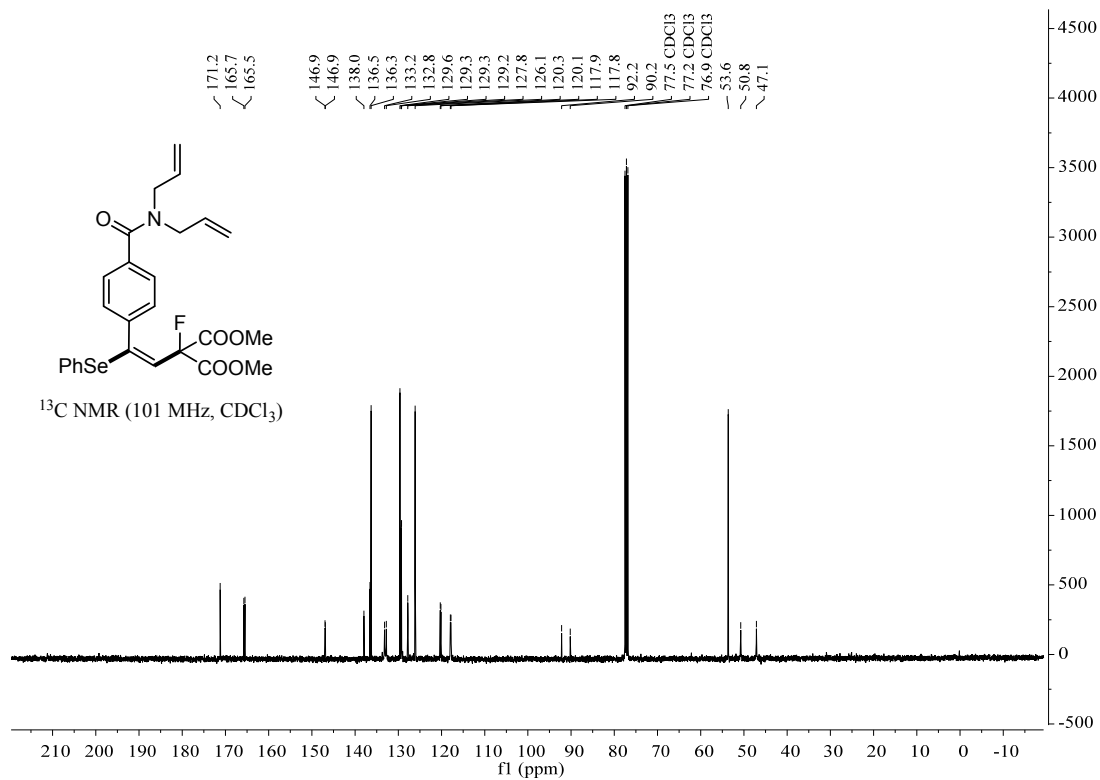

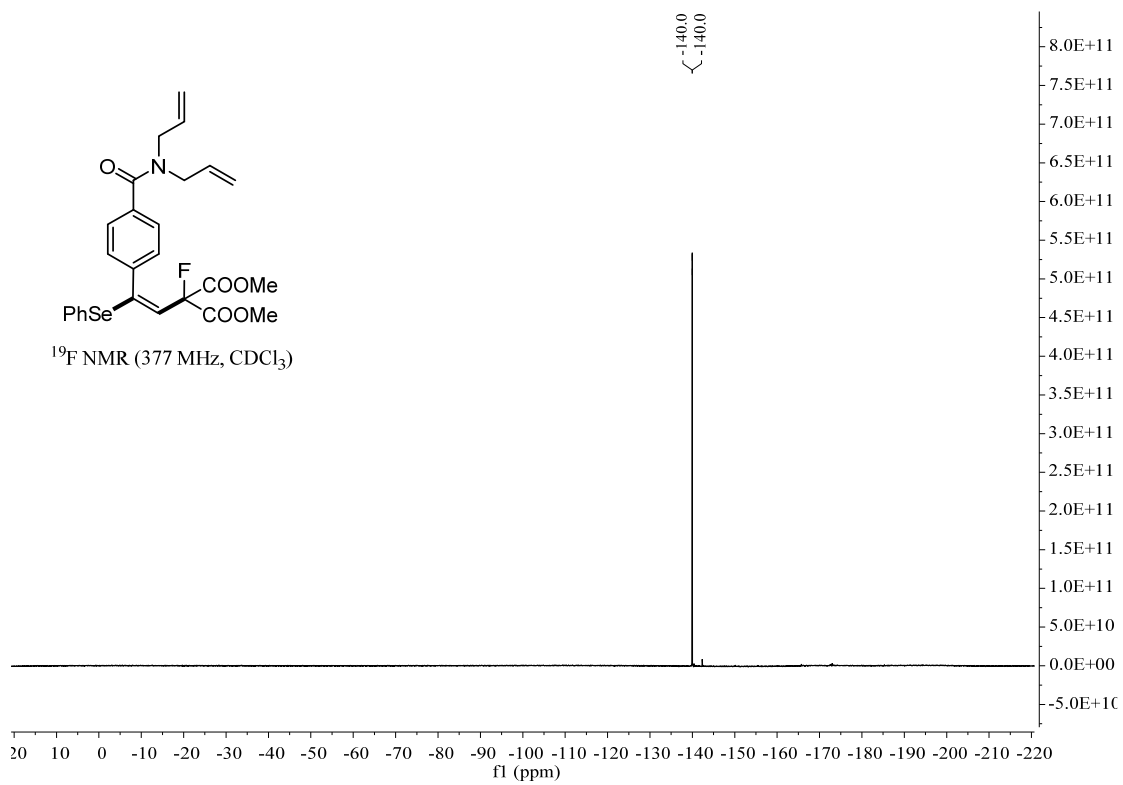

# Compound 23

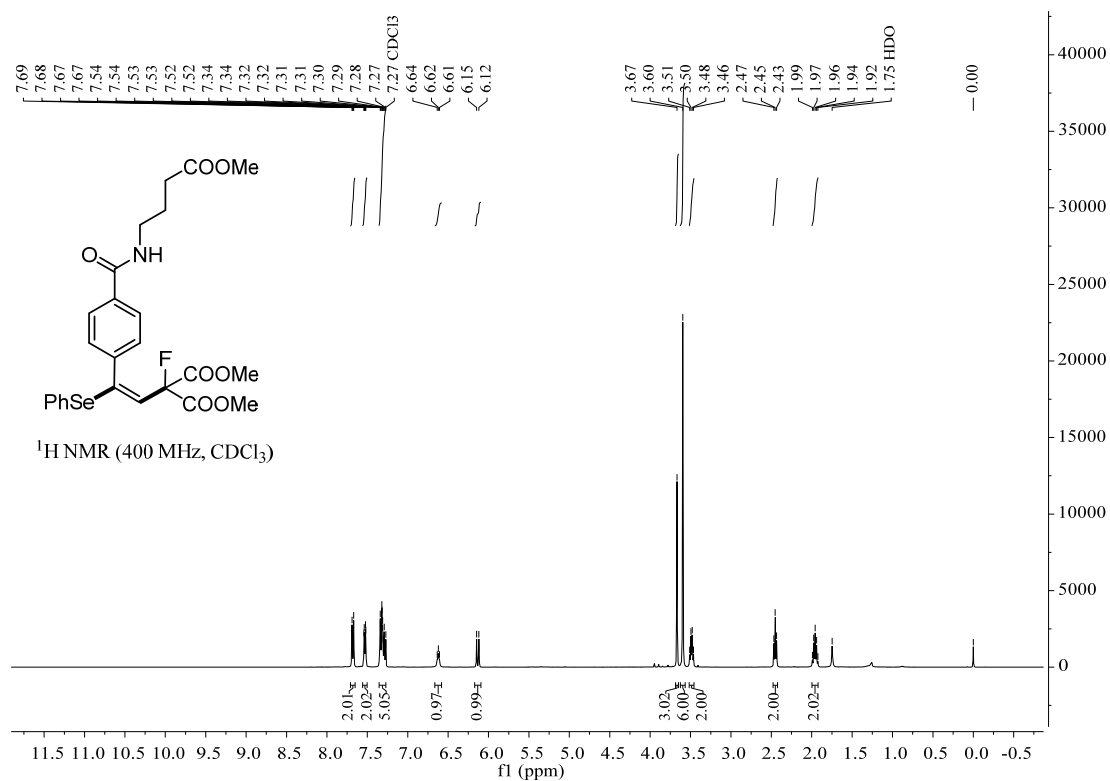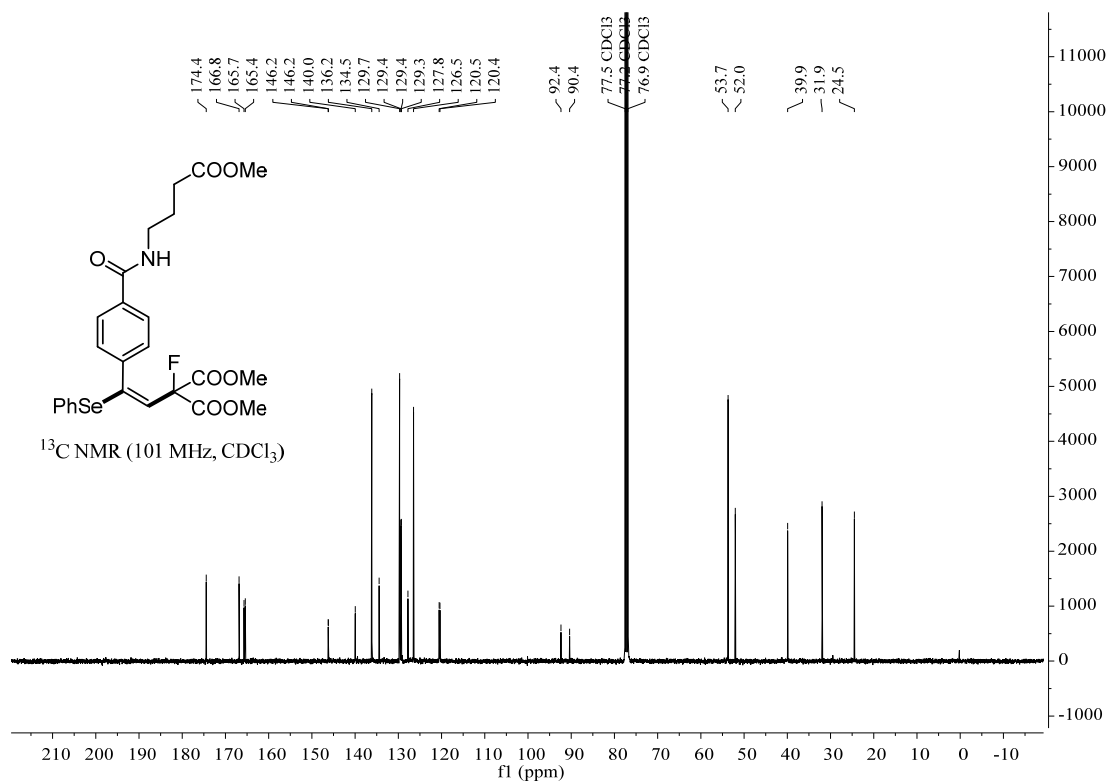

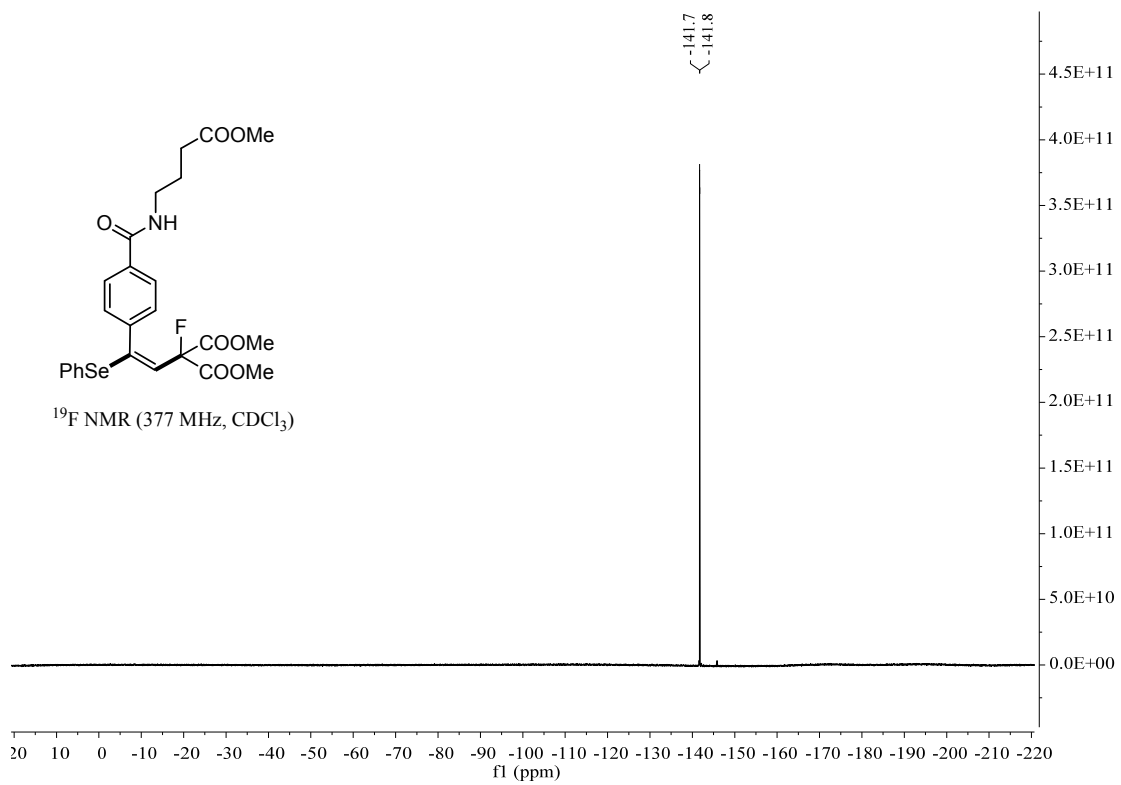

# Compound 24

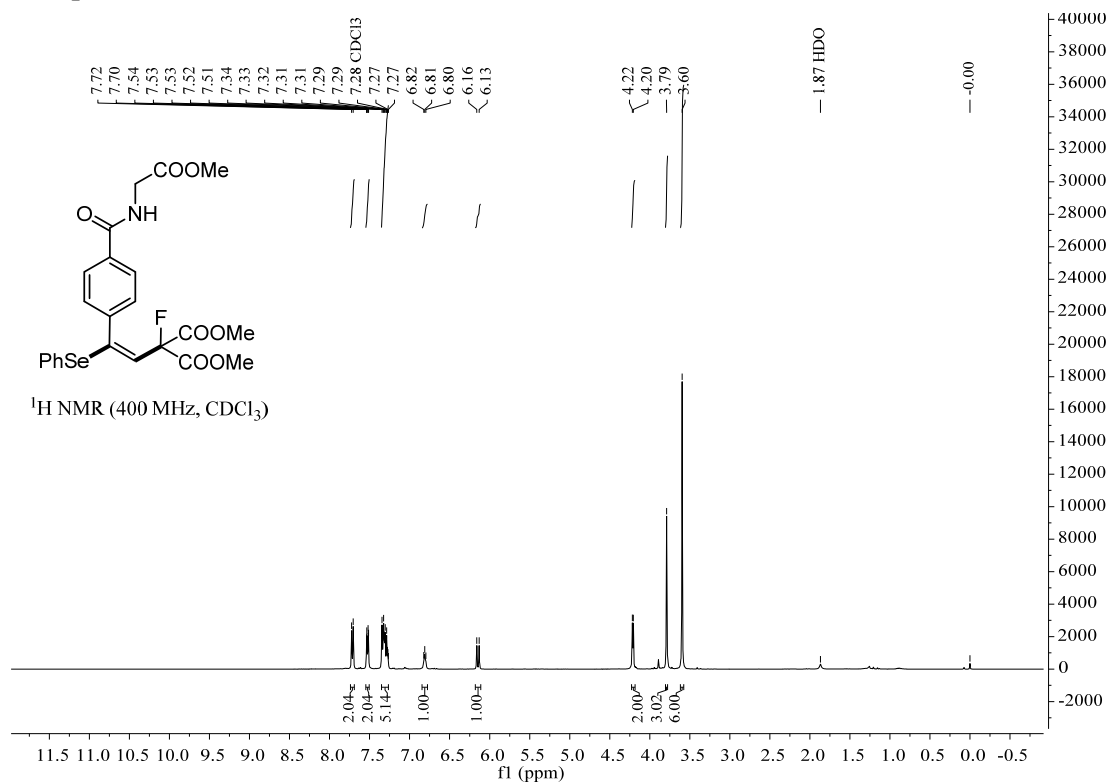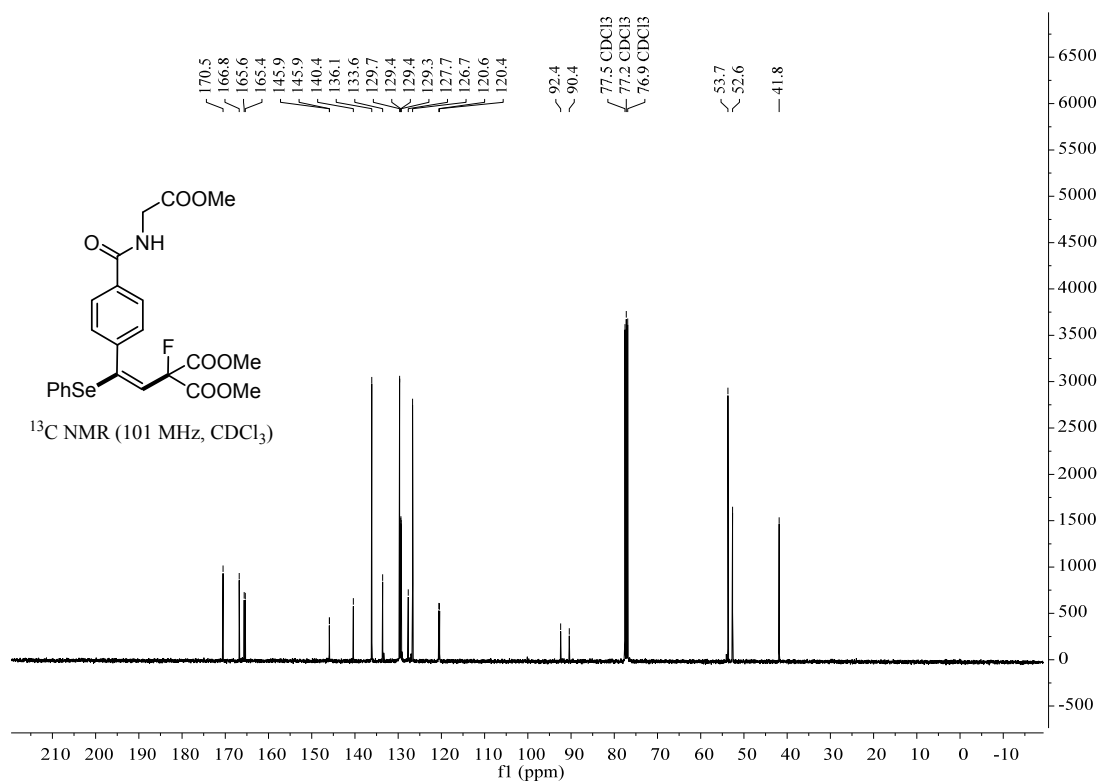



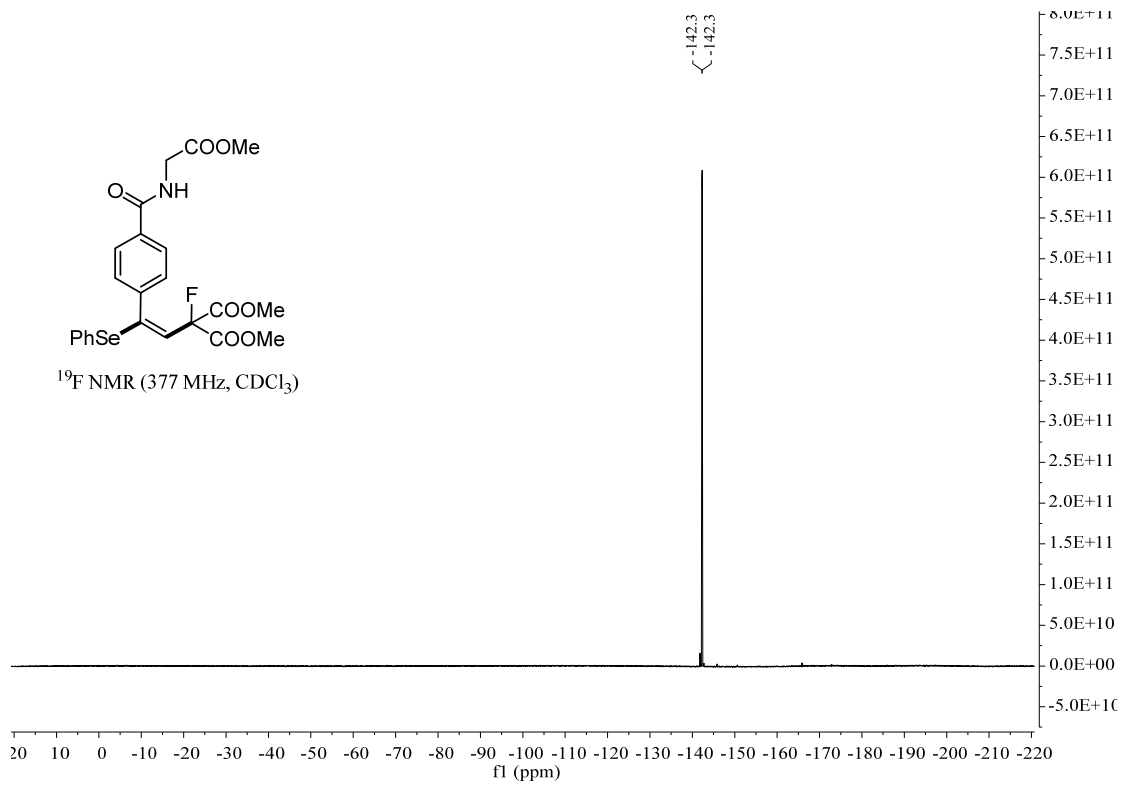

# Compound 25

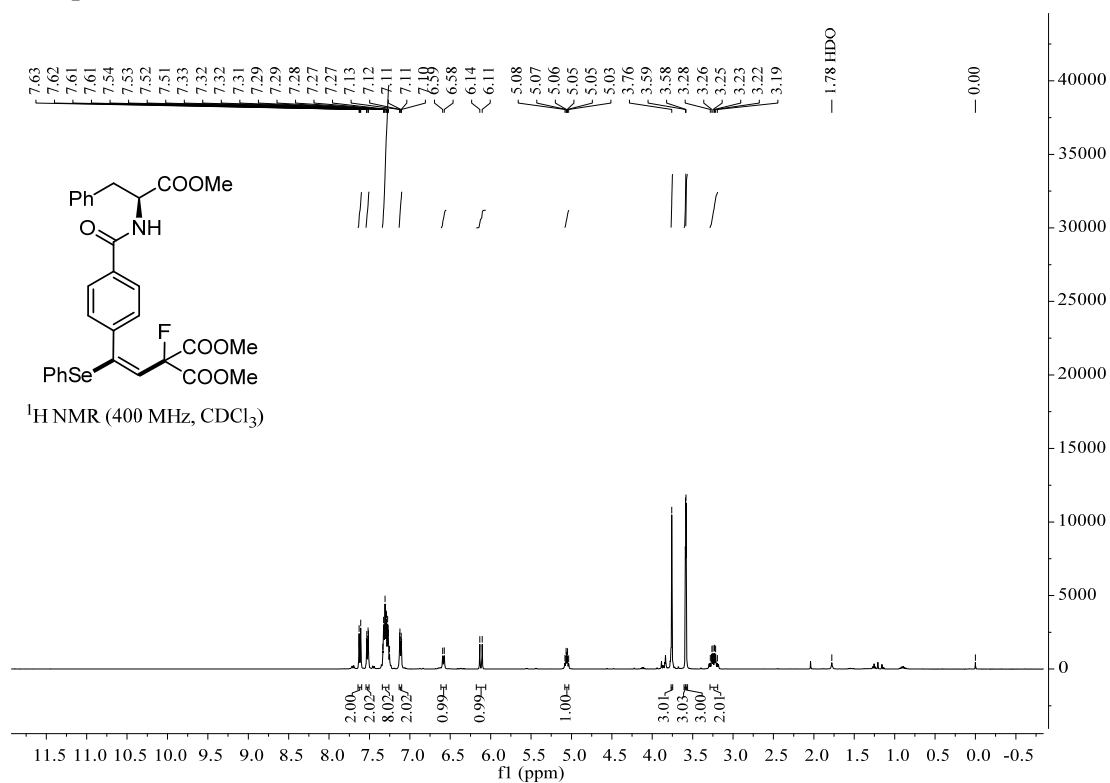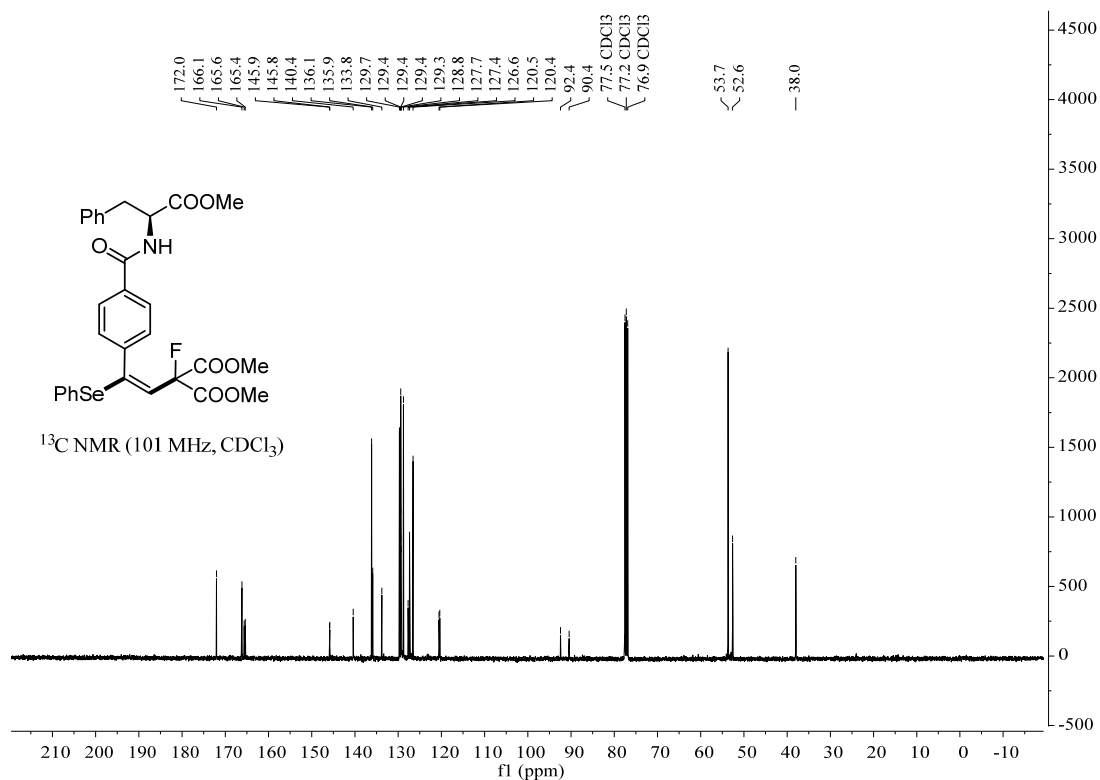

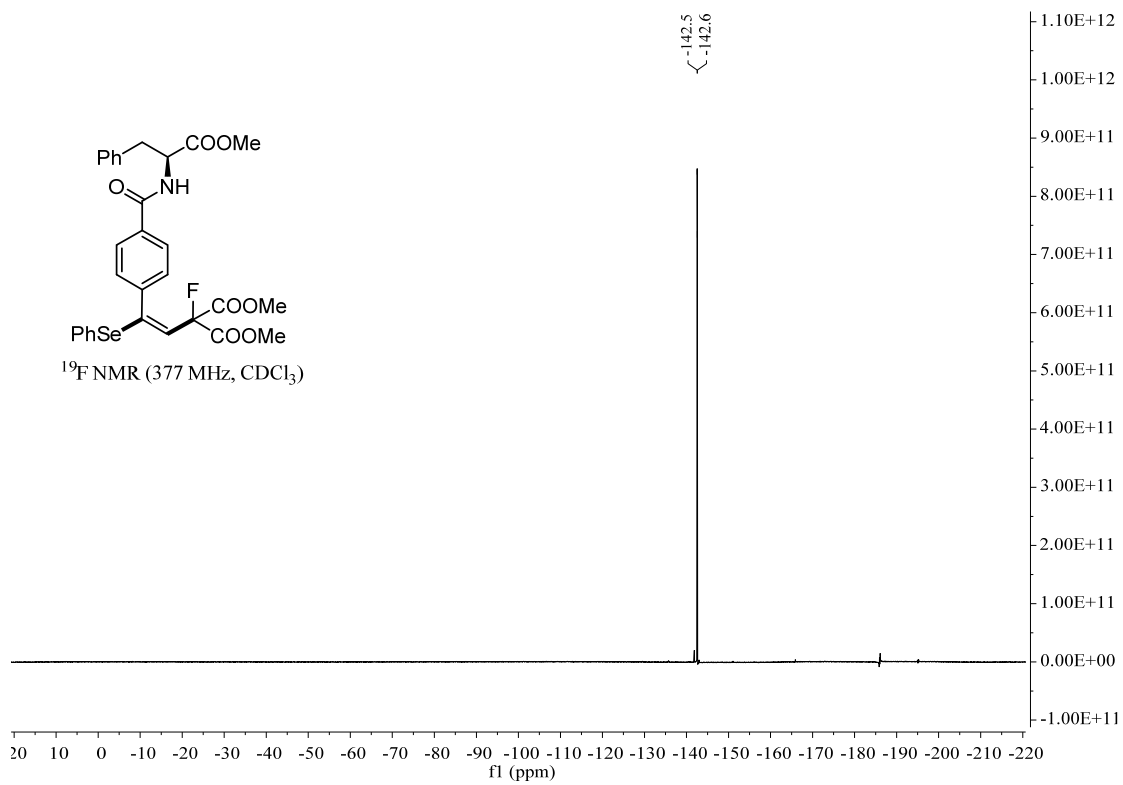

# Compound 26

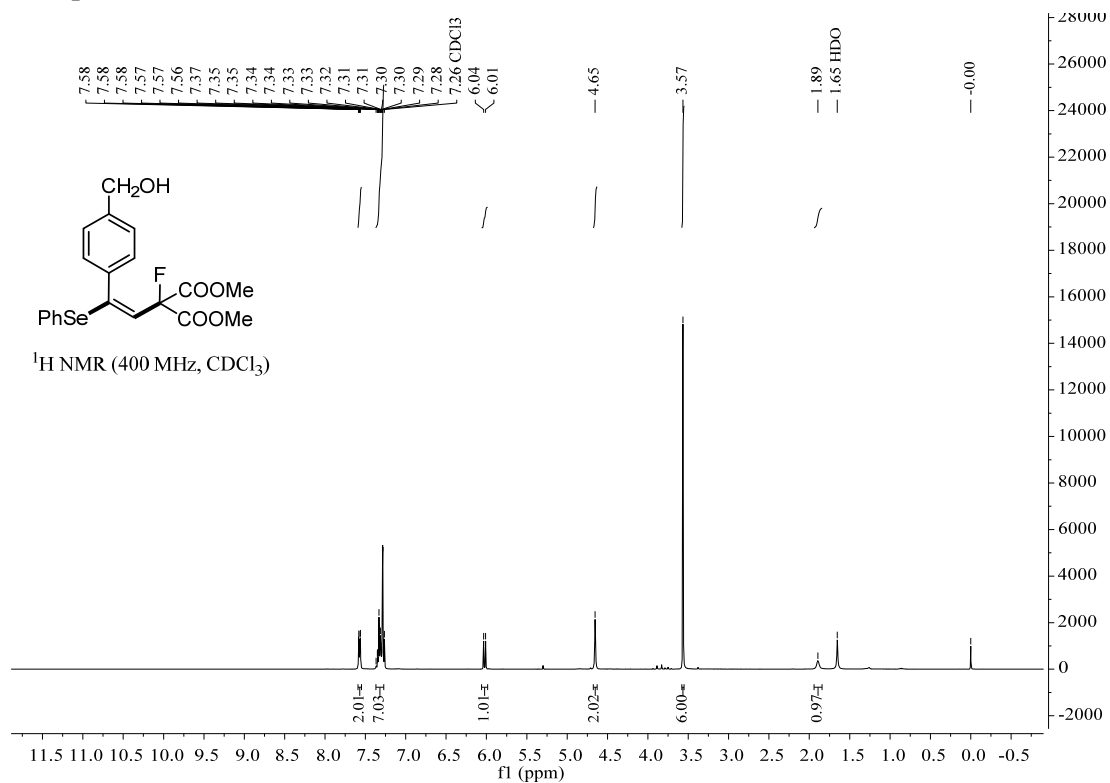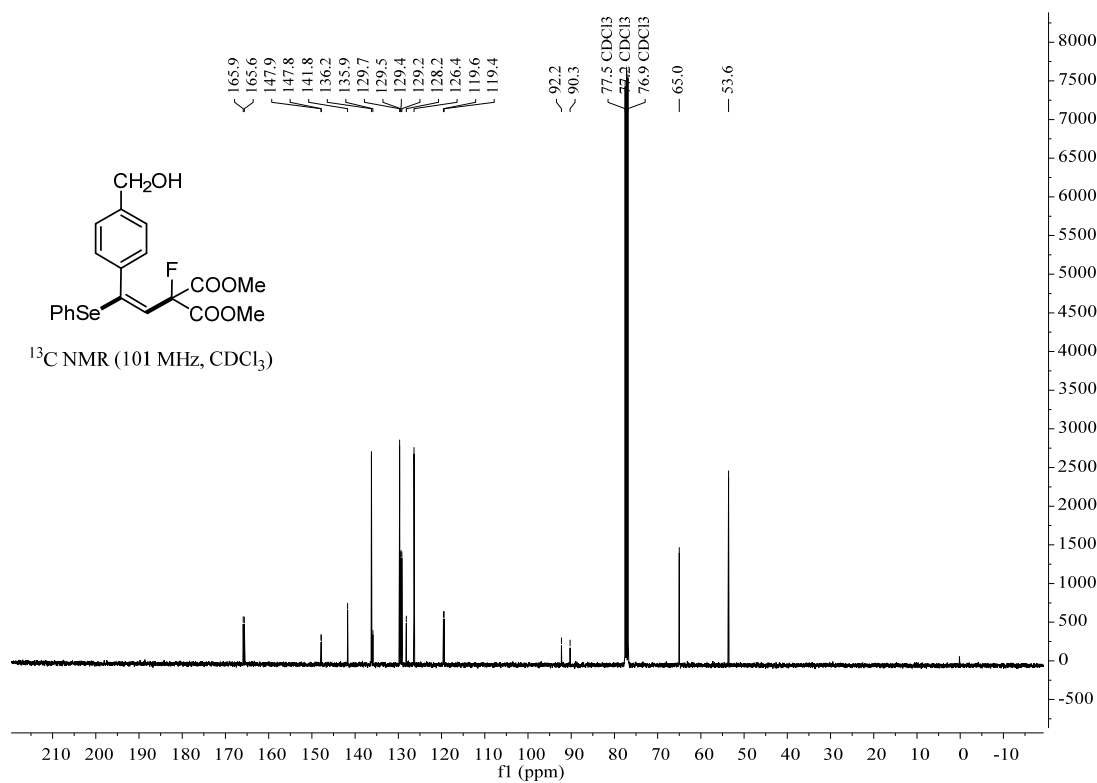

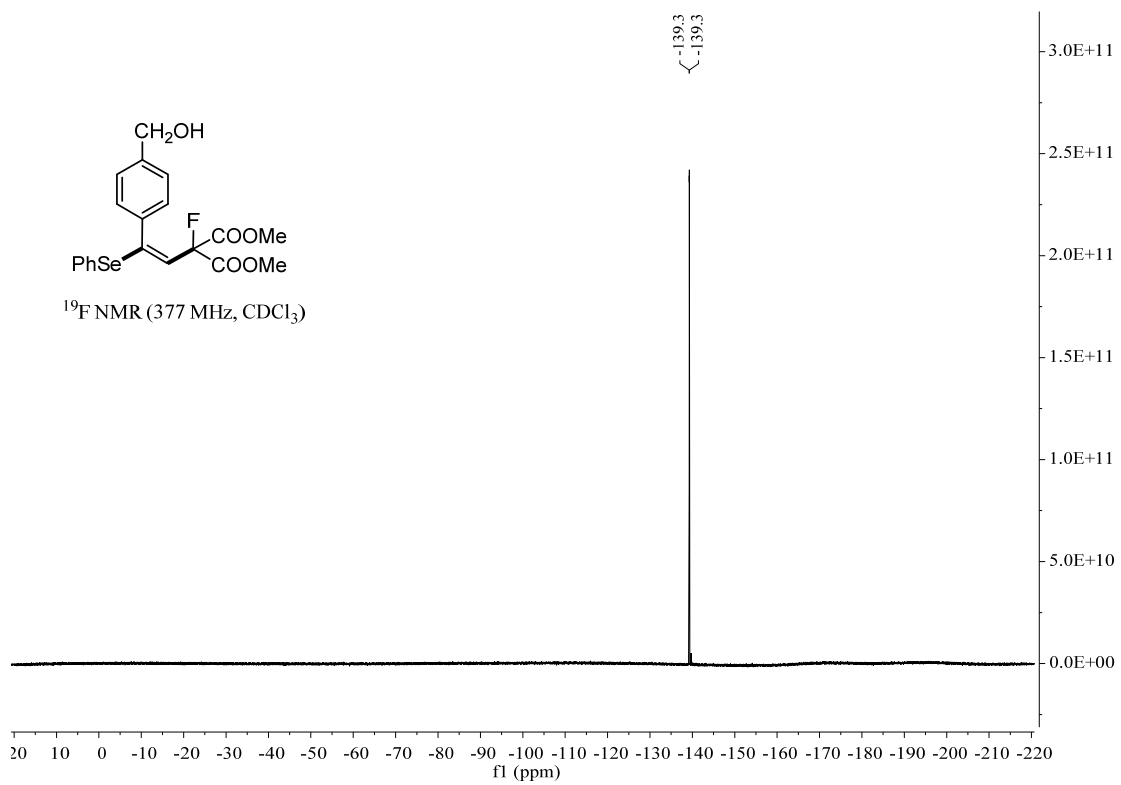

# Compound 27

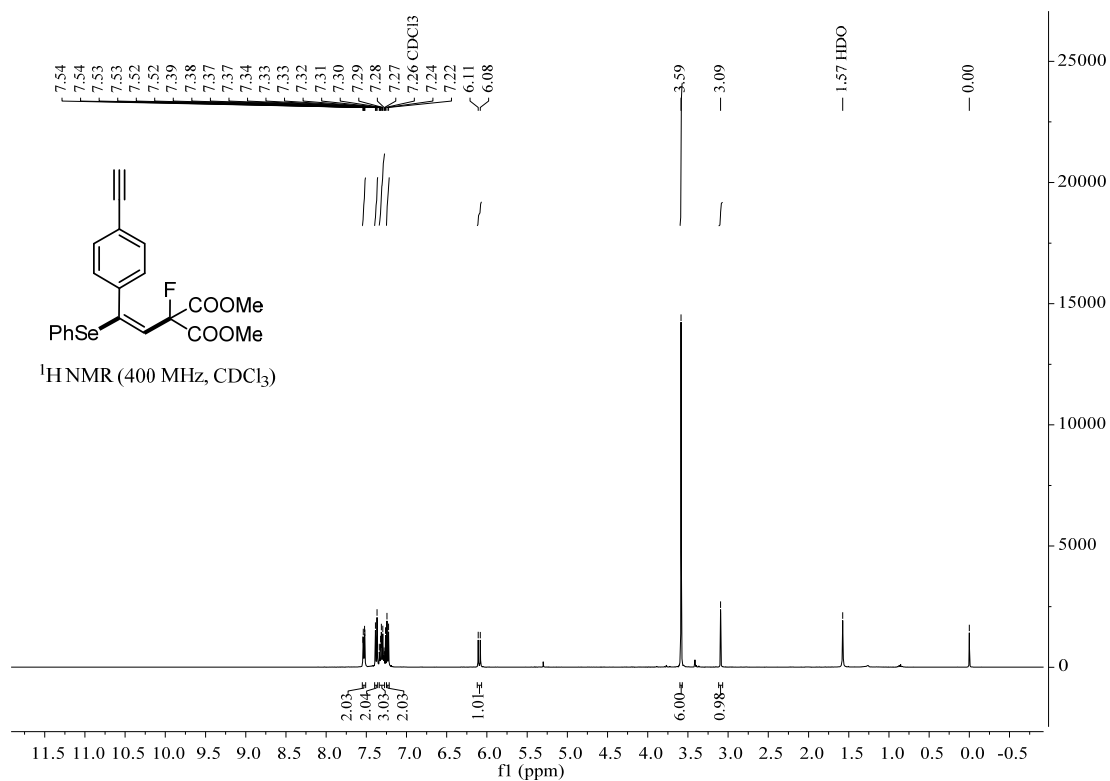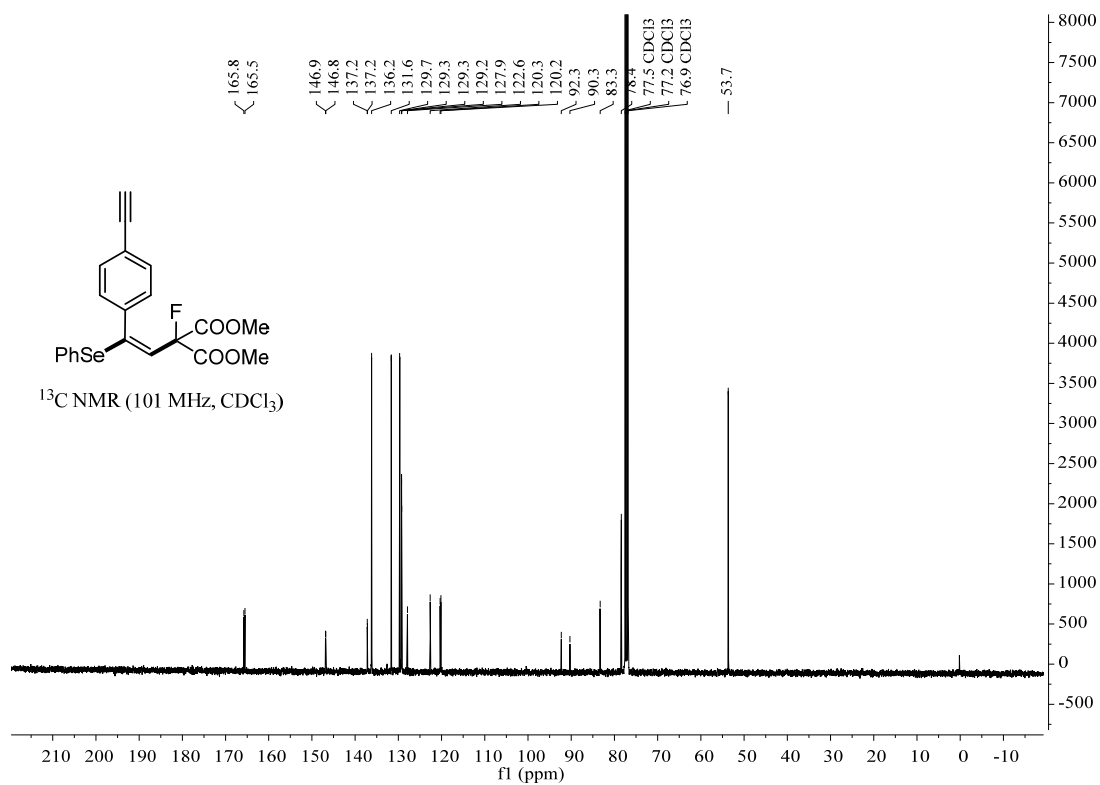

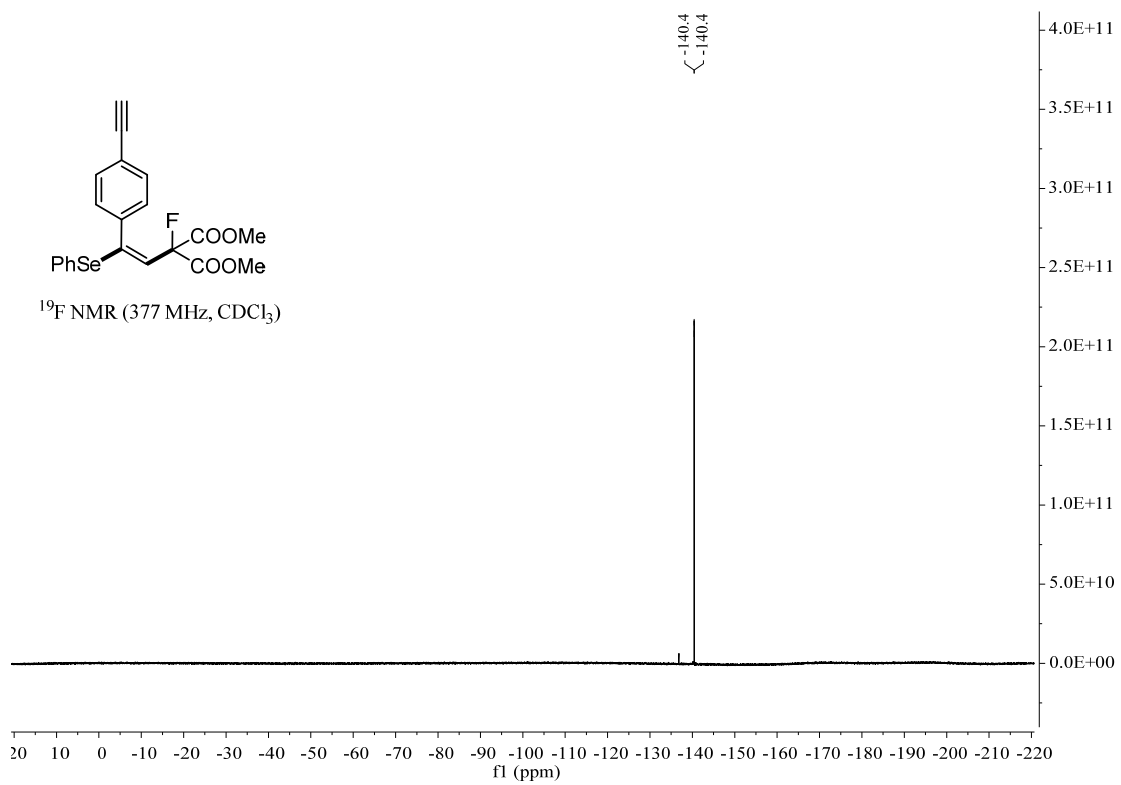

# Compound 28

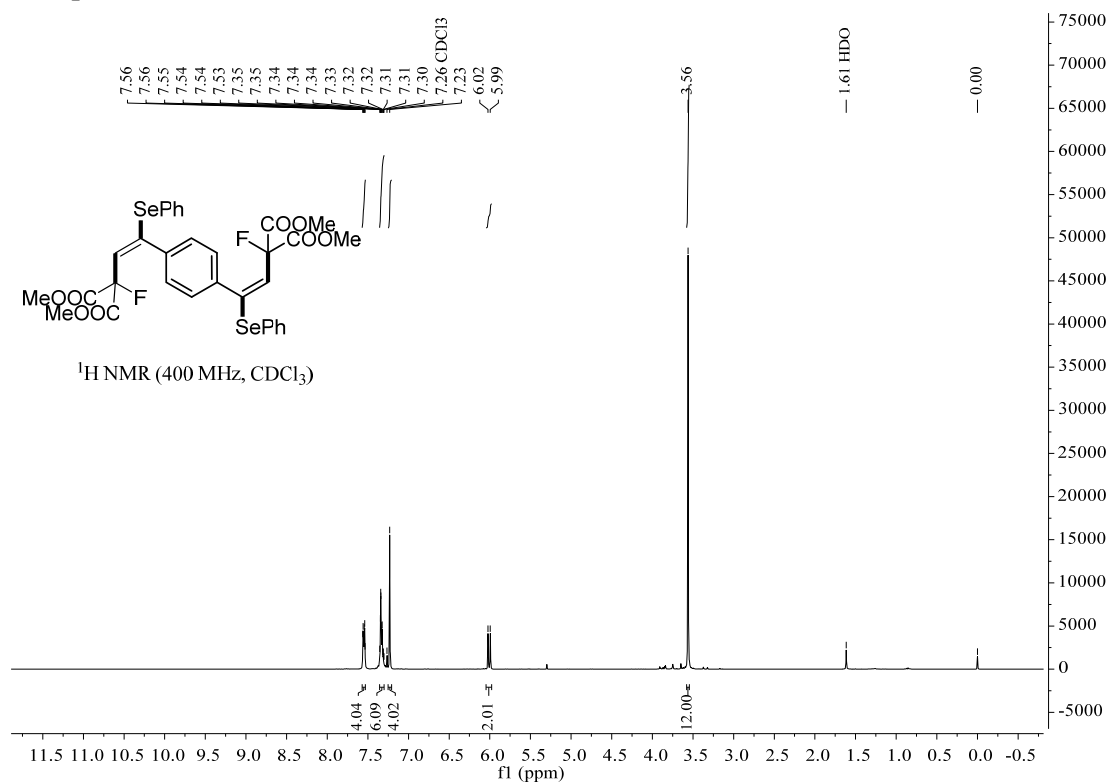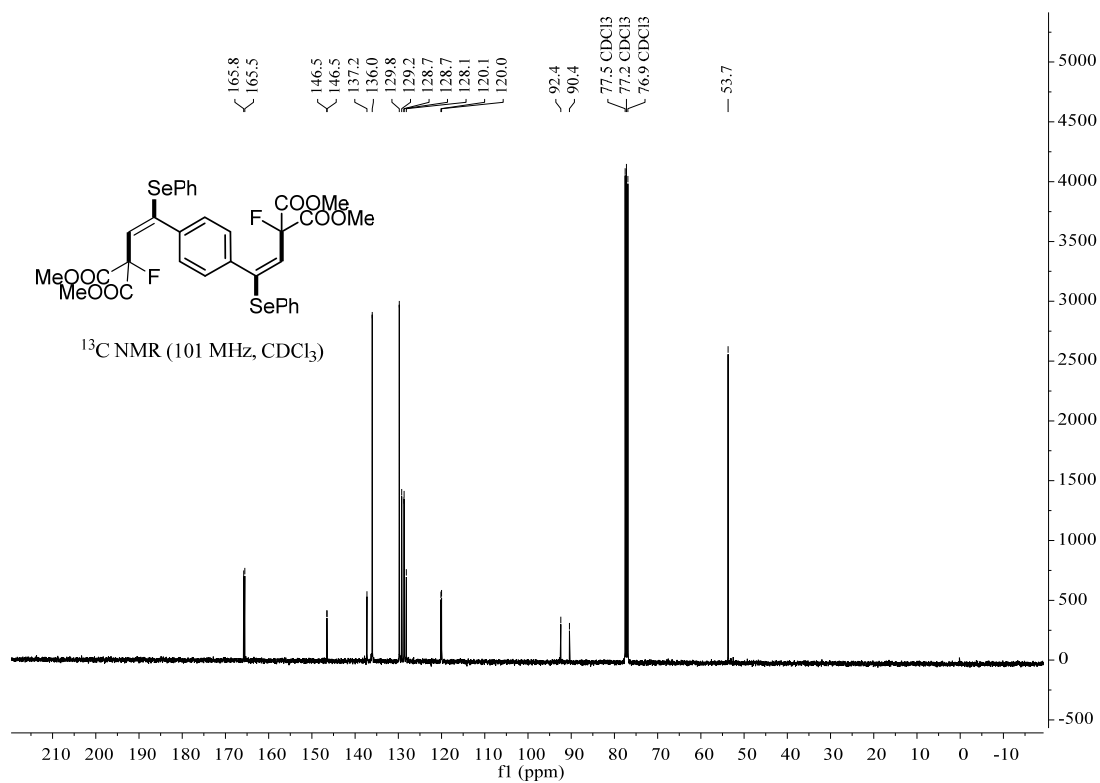



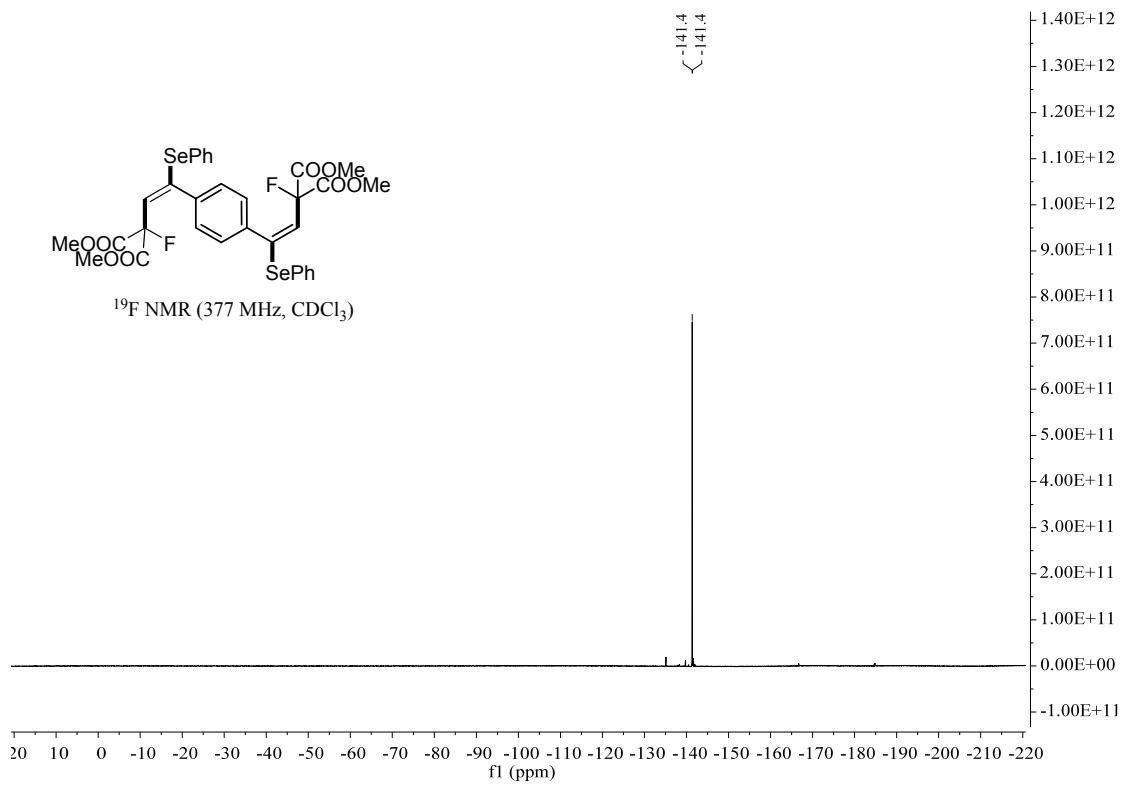

# Compound 29

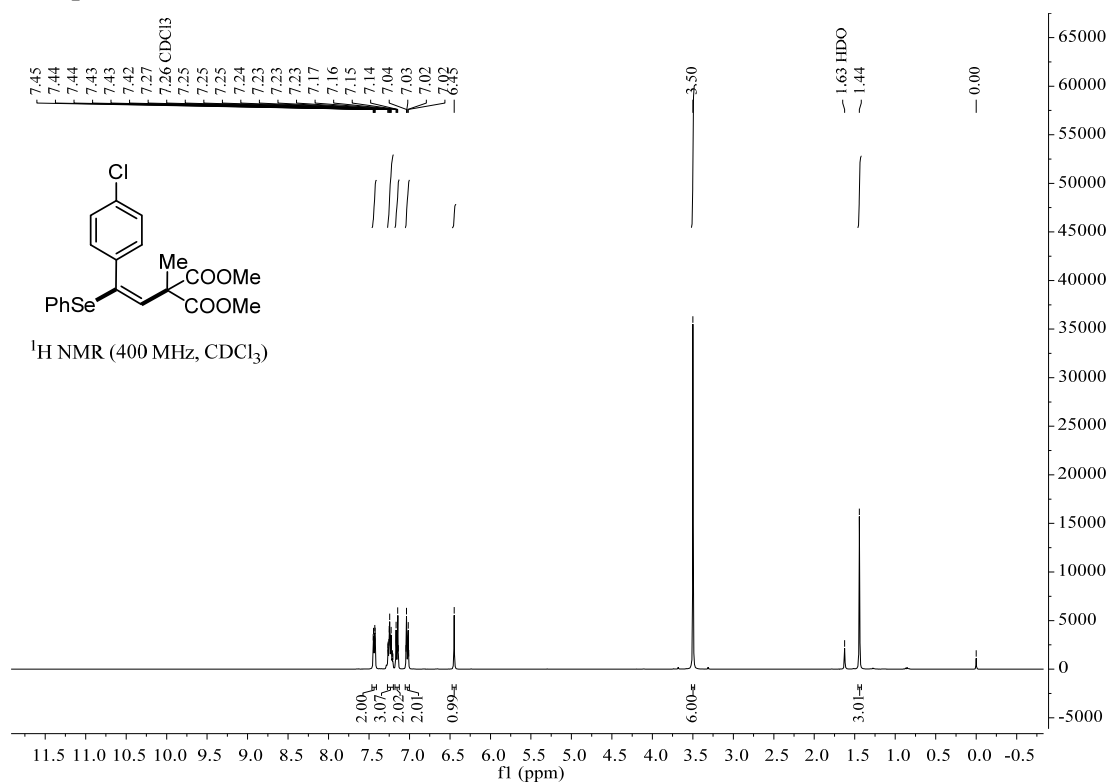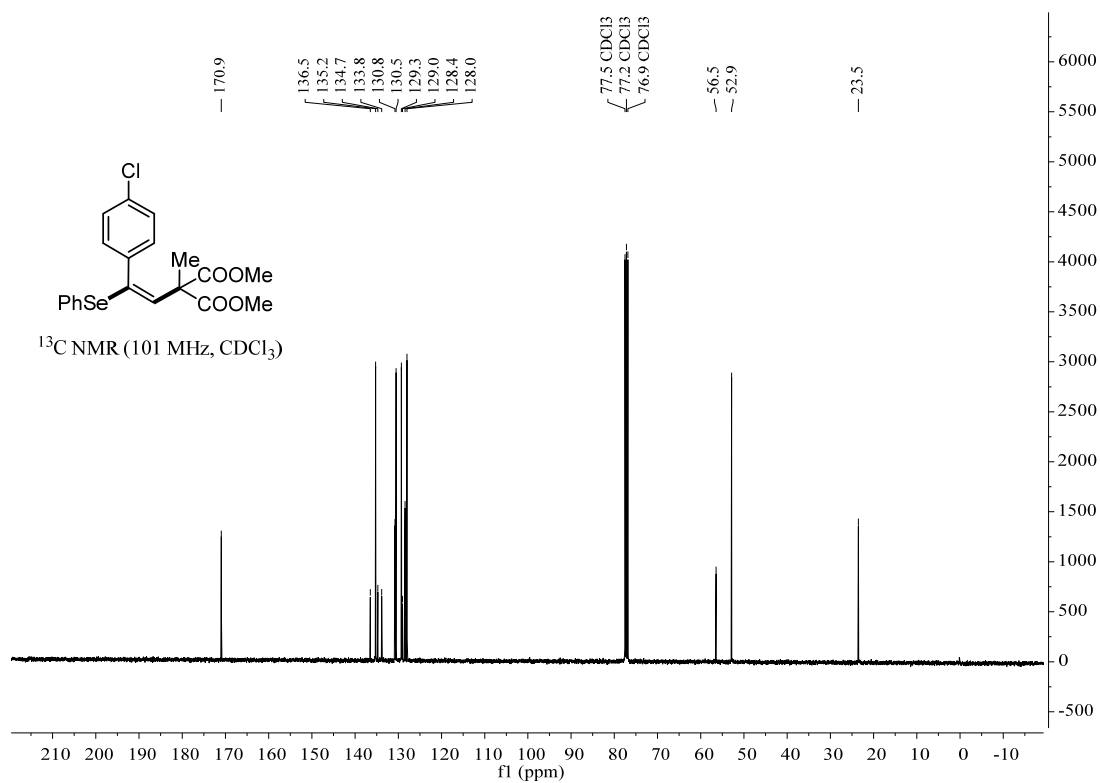

# Compound 30

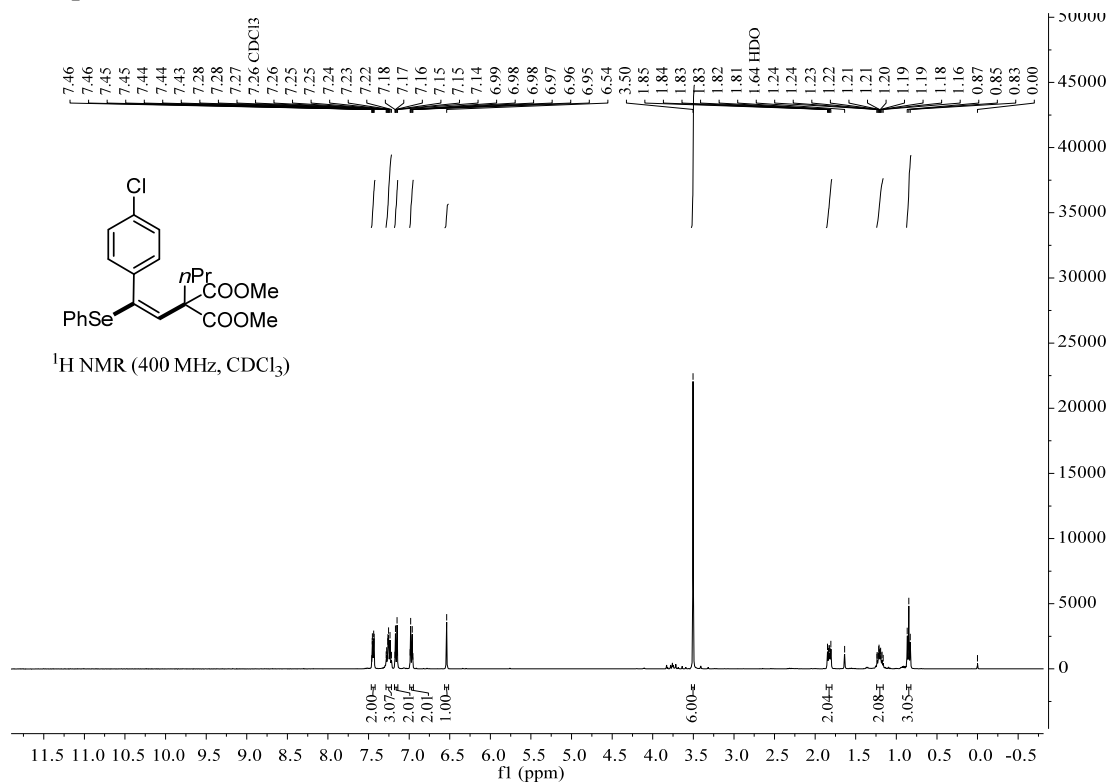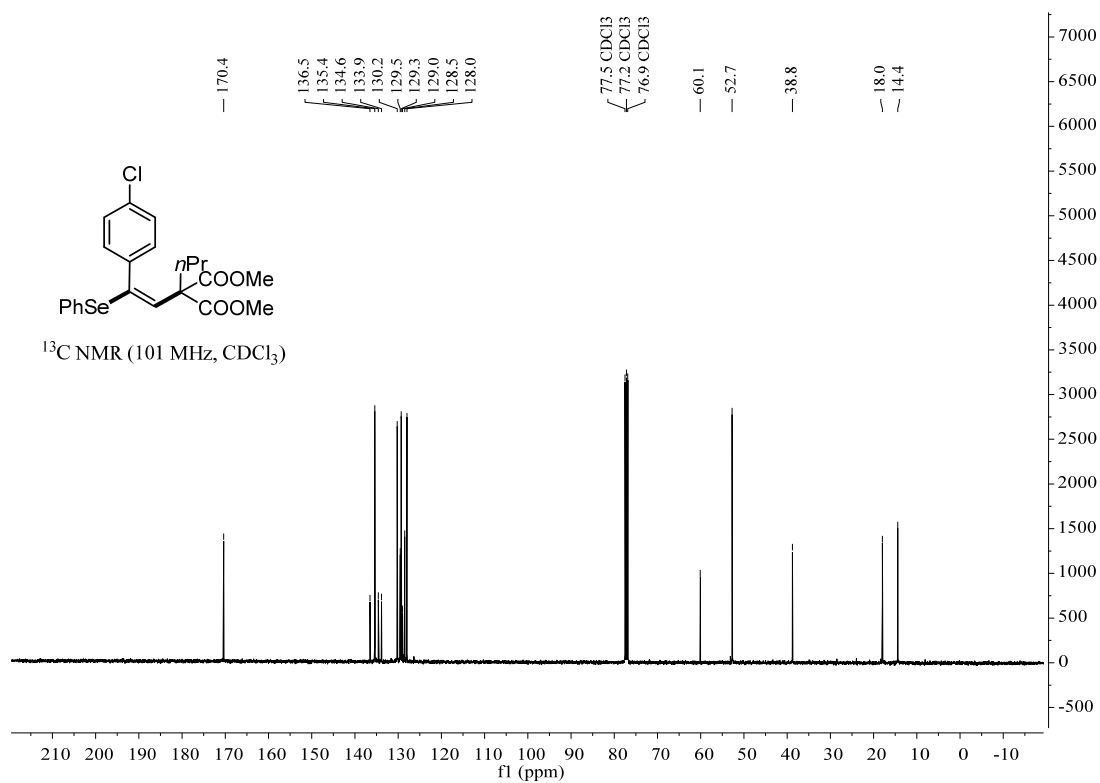

# Compound 31

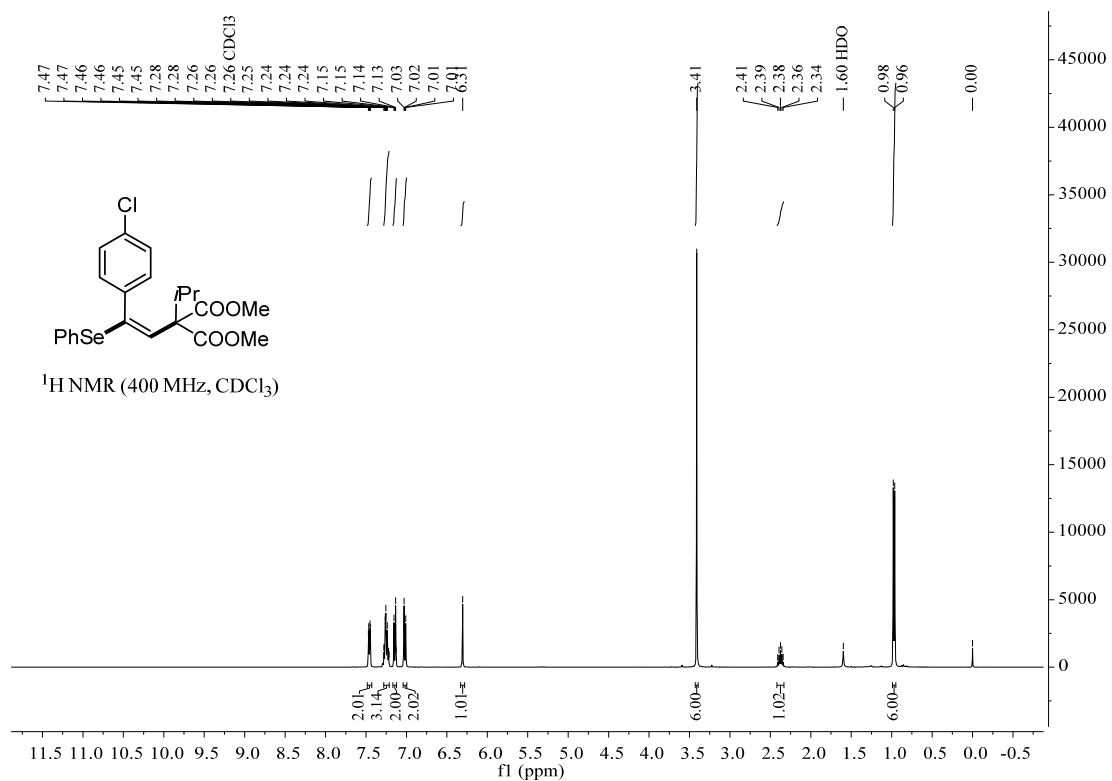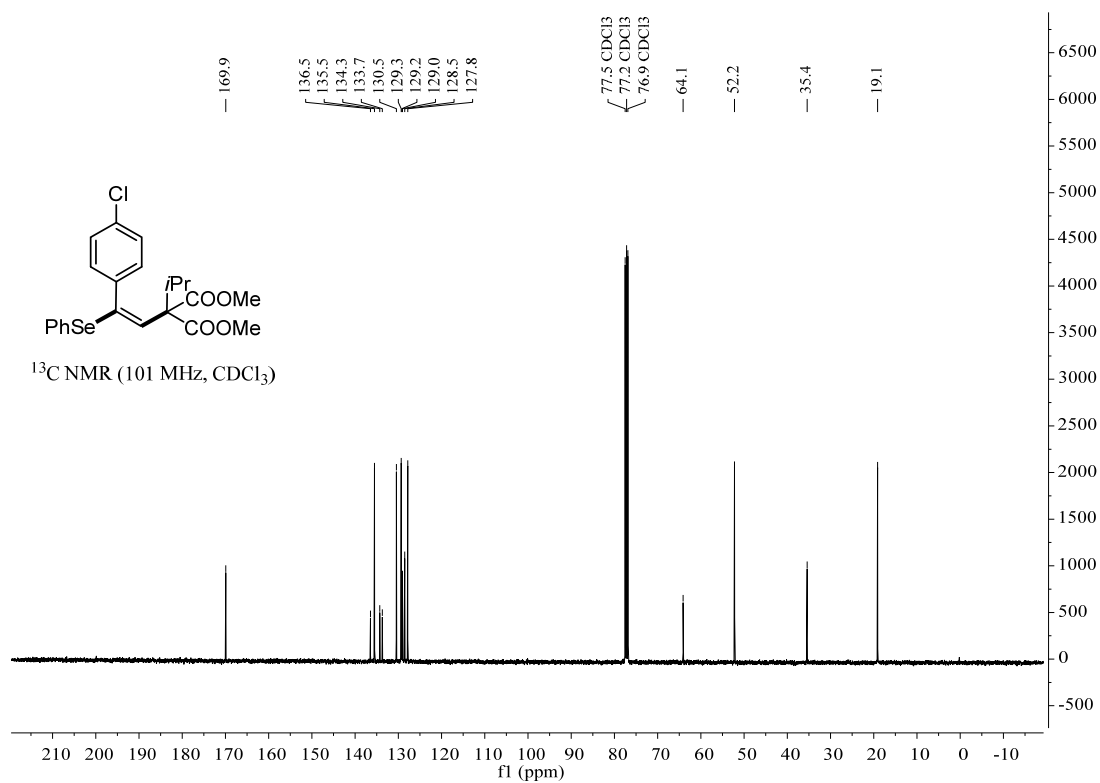

# Compound 32

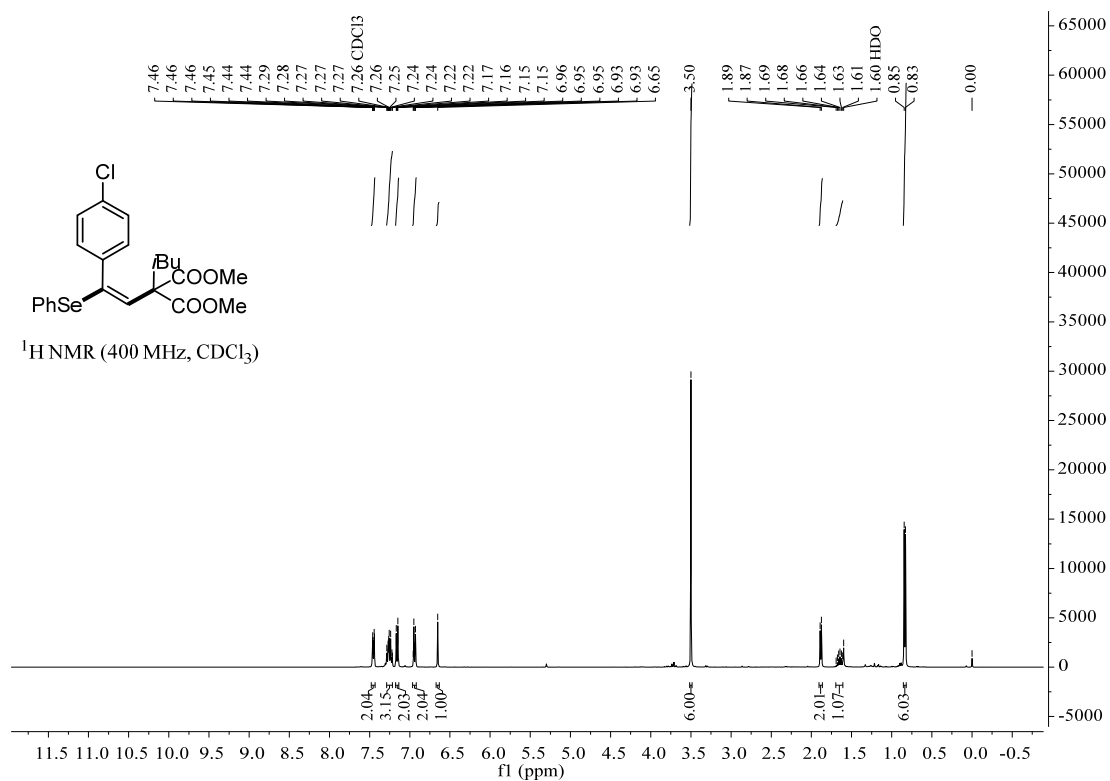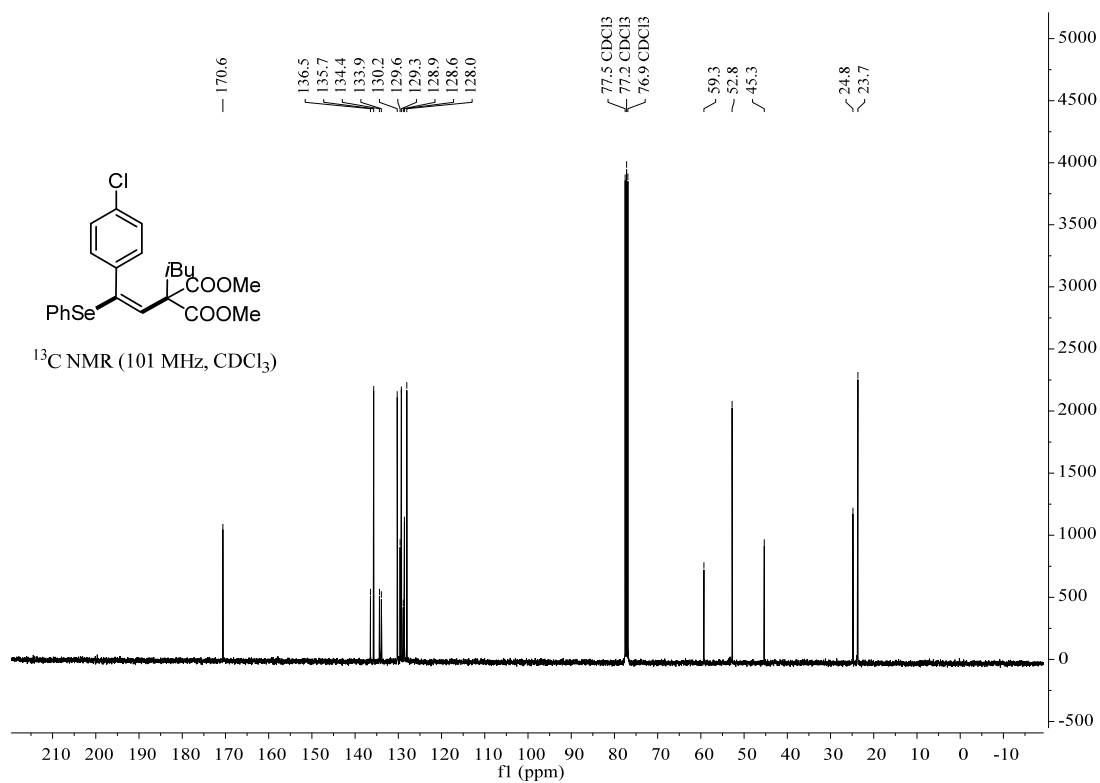

# Compound 33

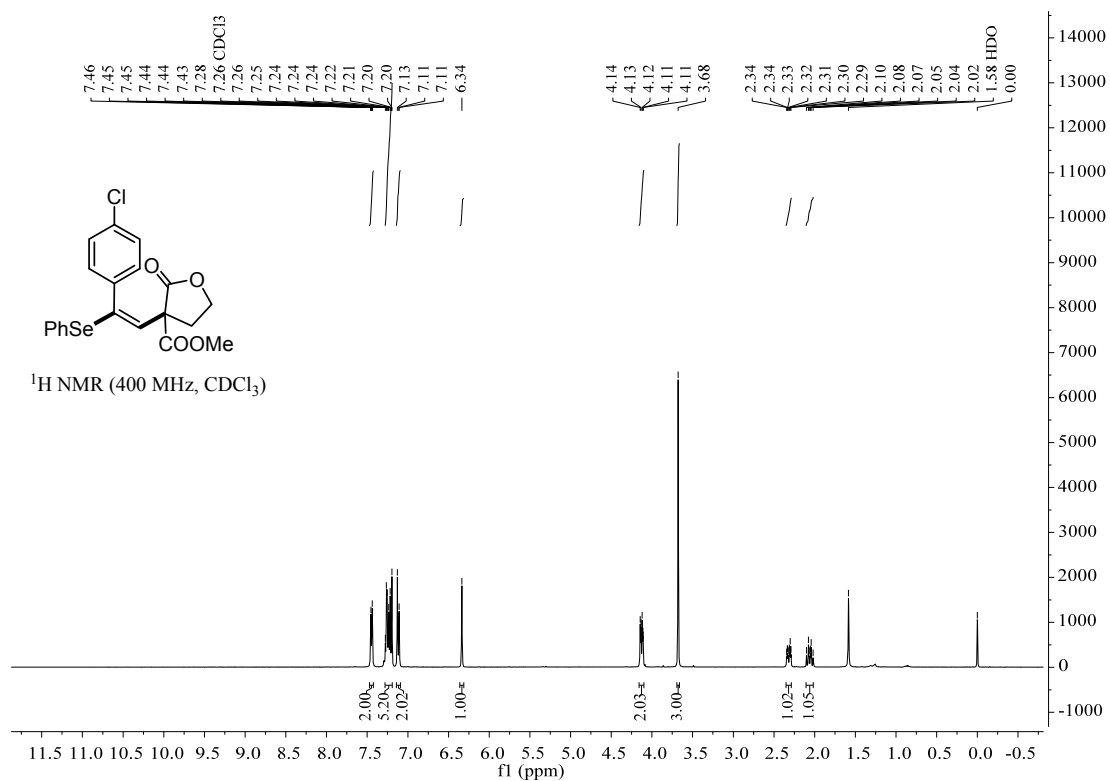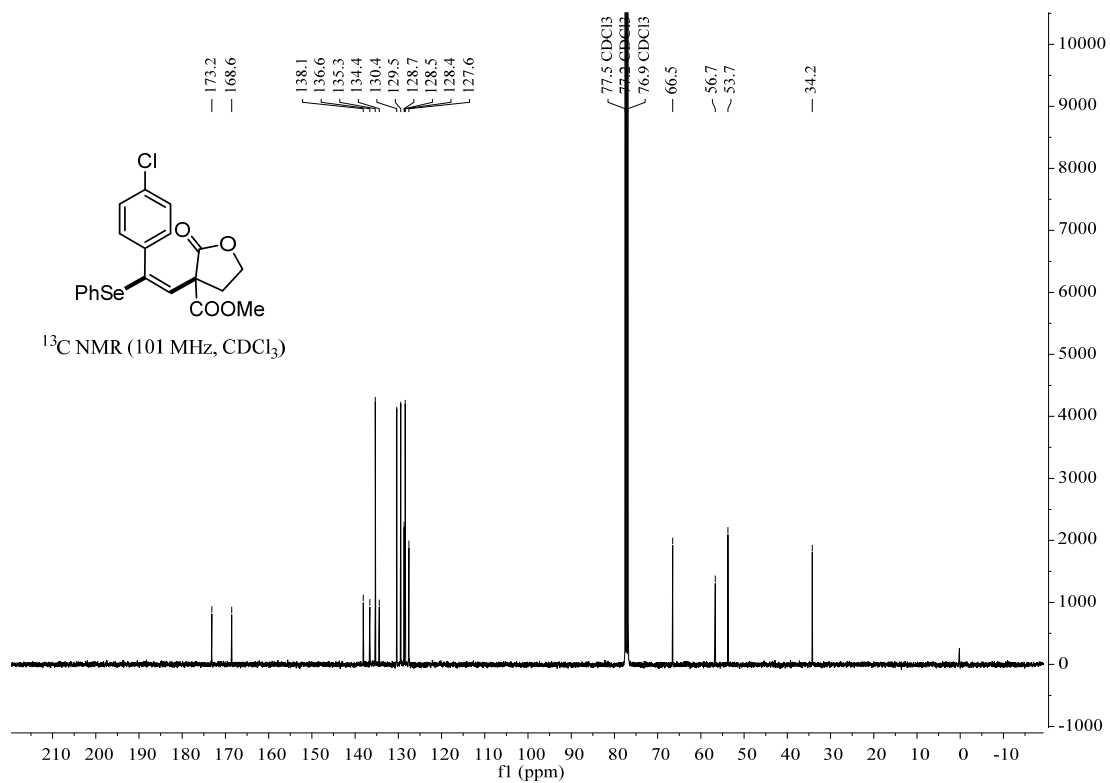

# Compound 34

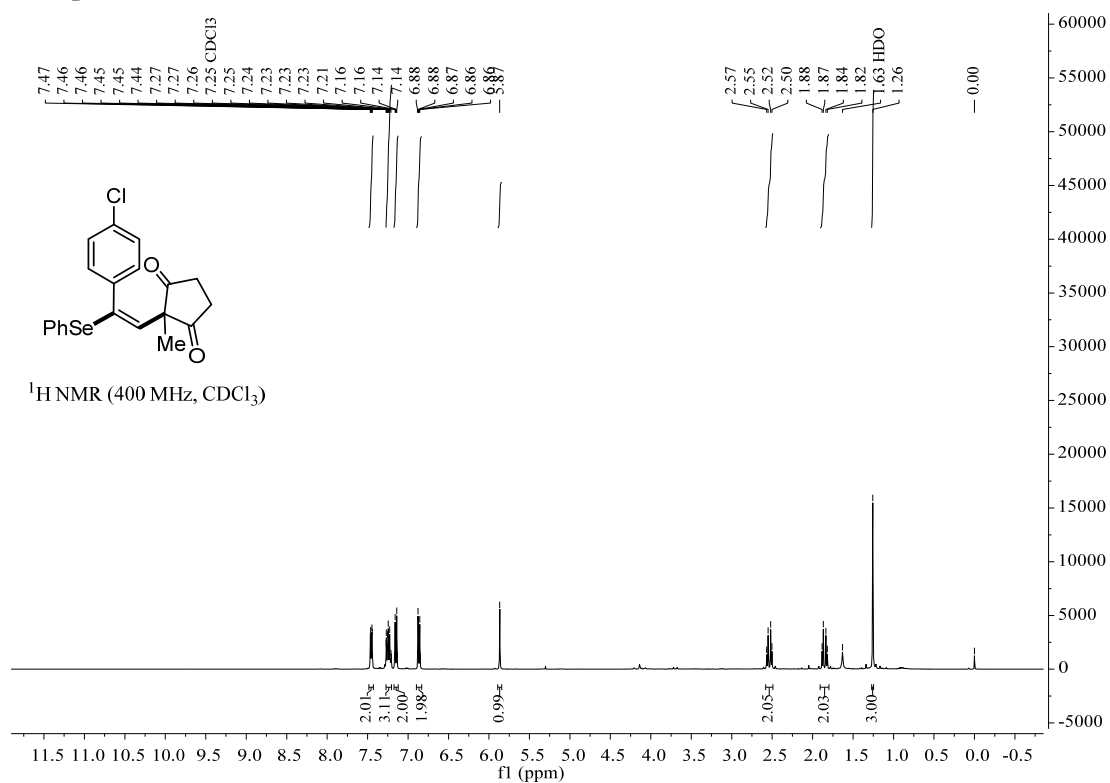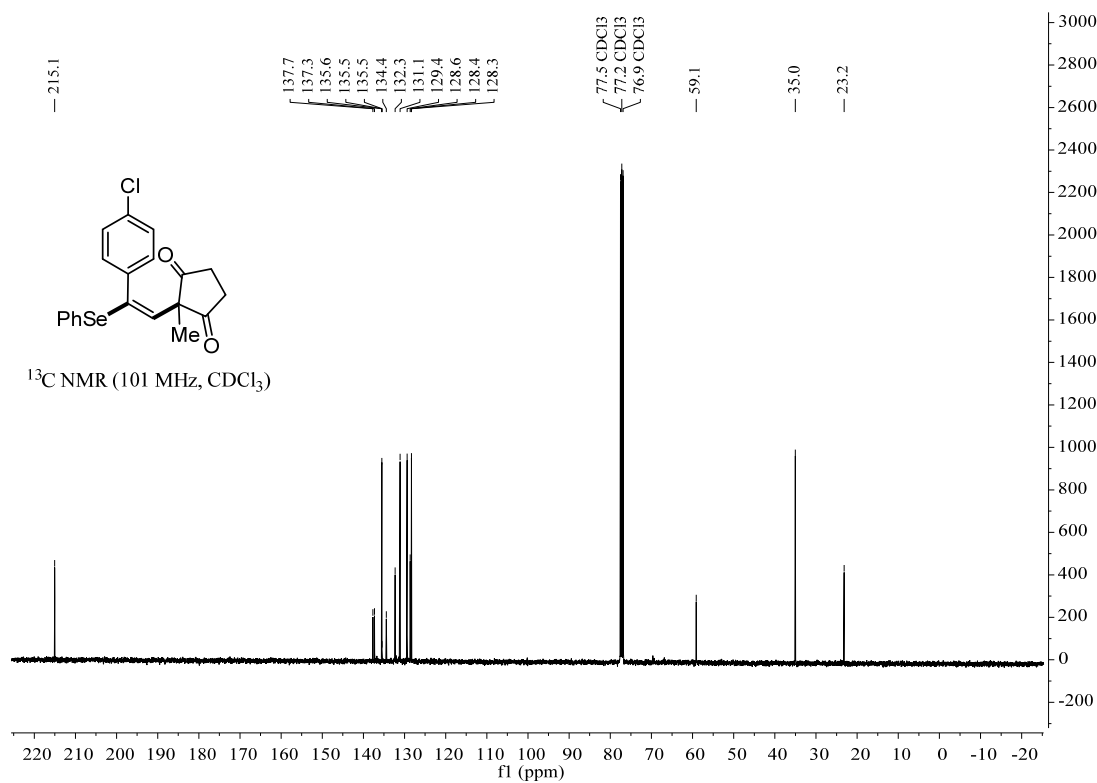

# Compound 35

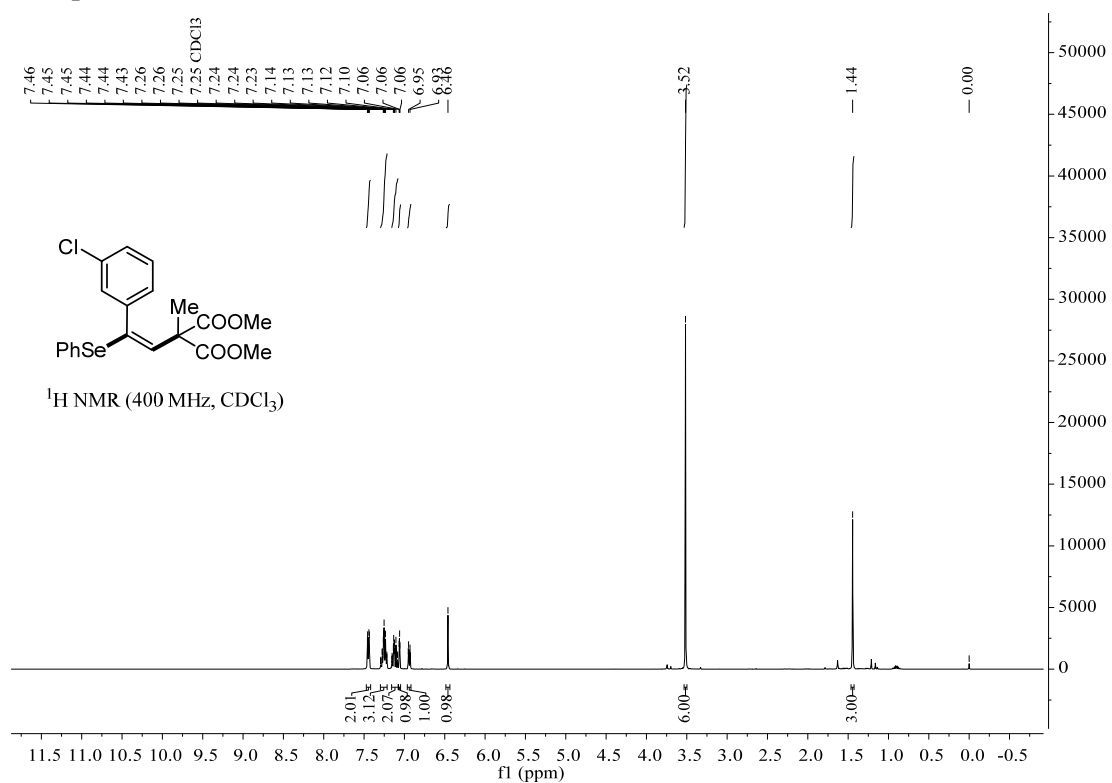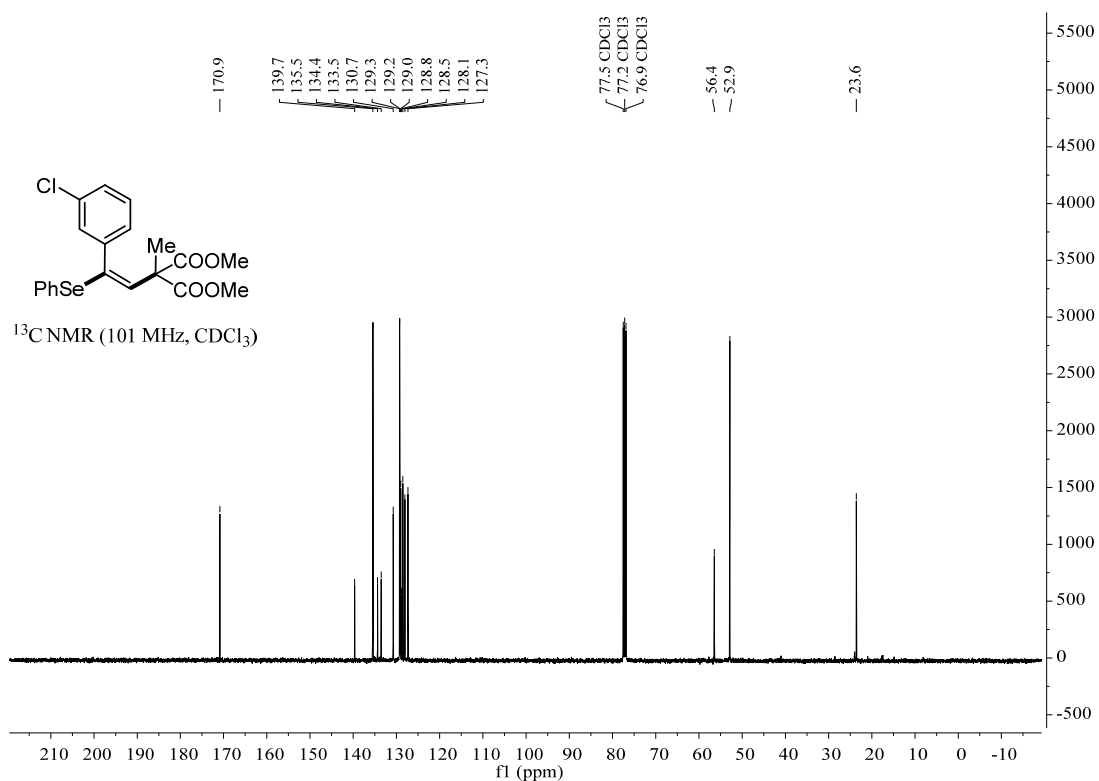



# Compound 36

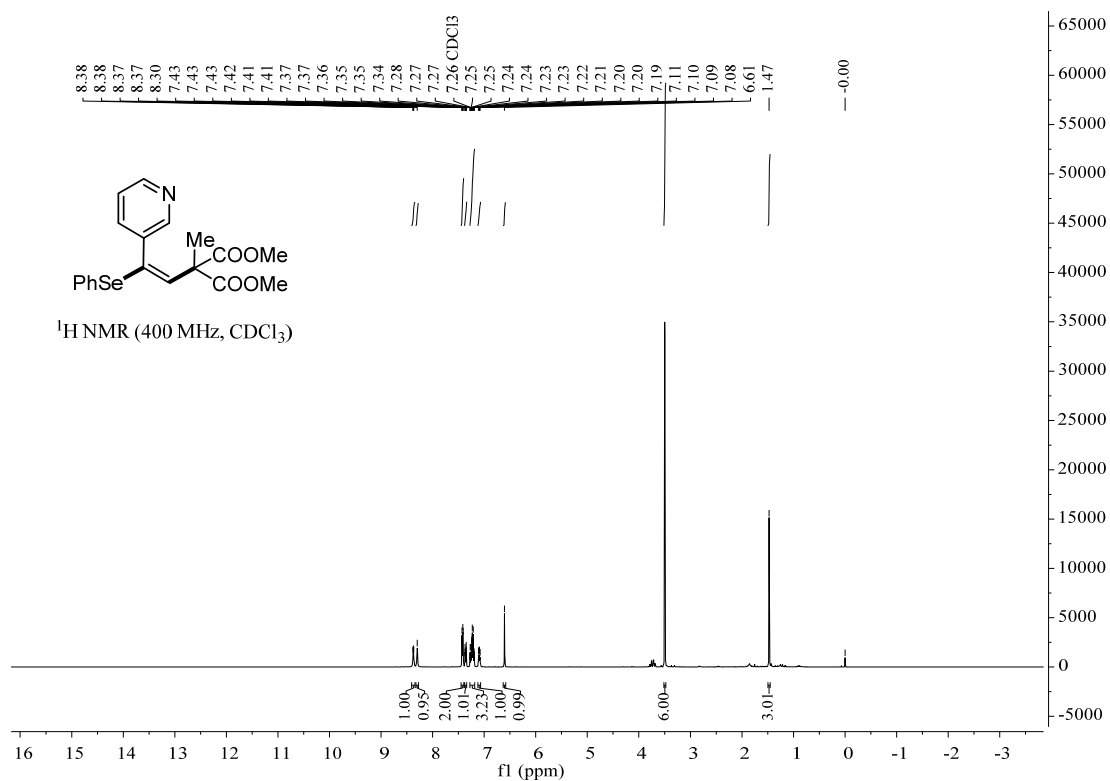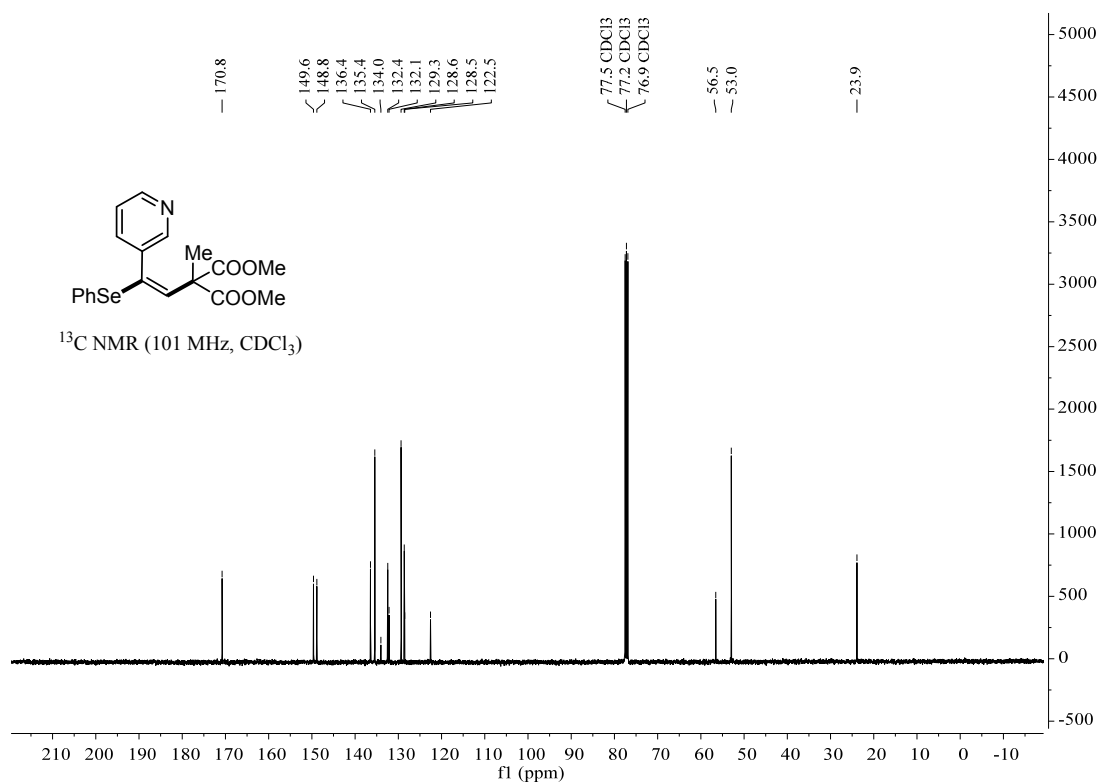

### Compound 37

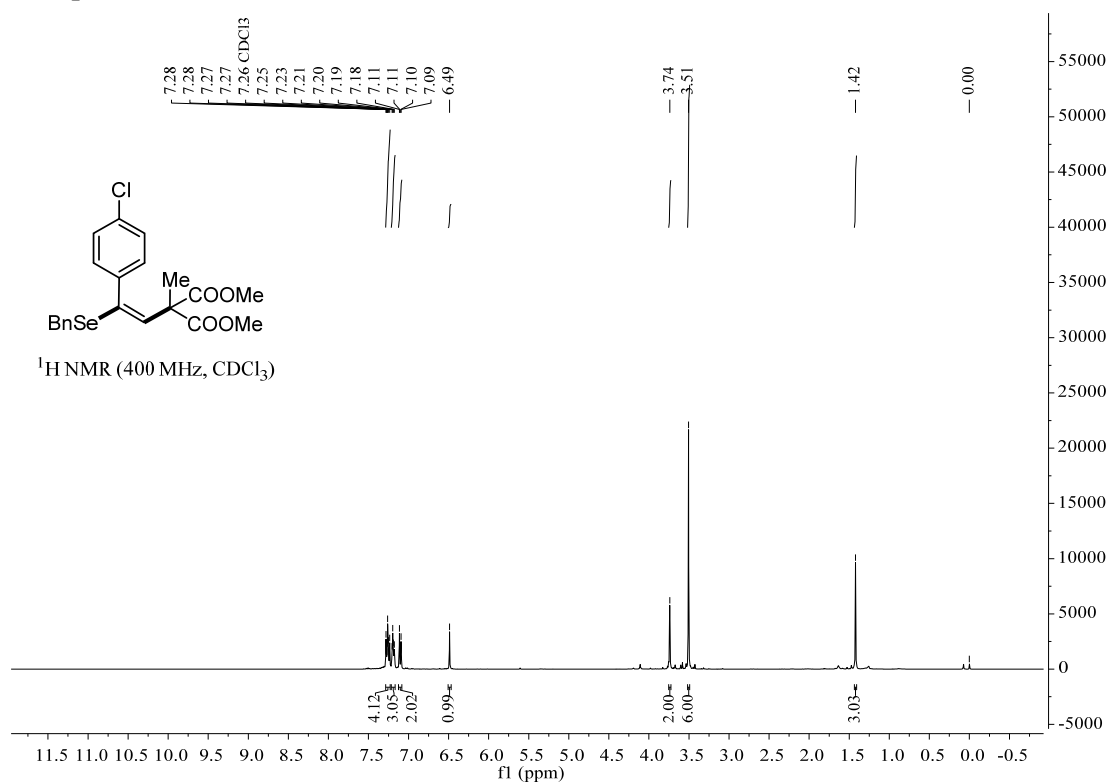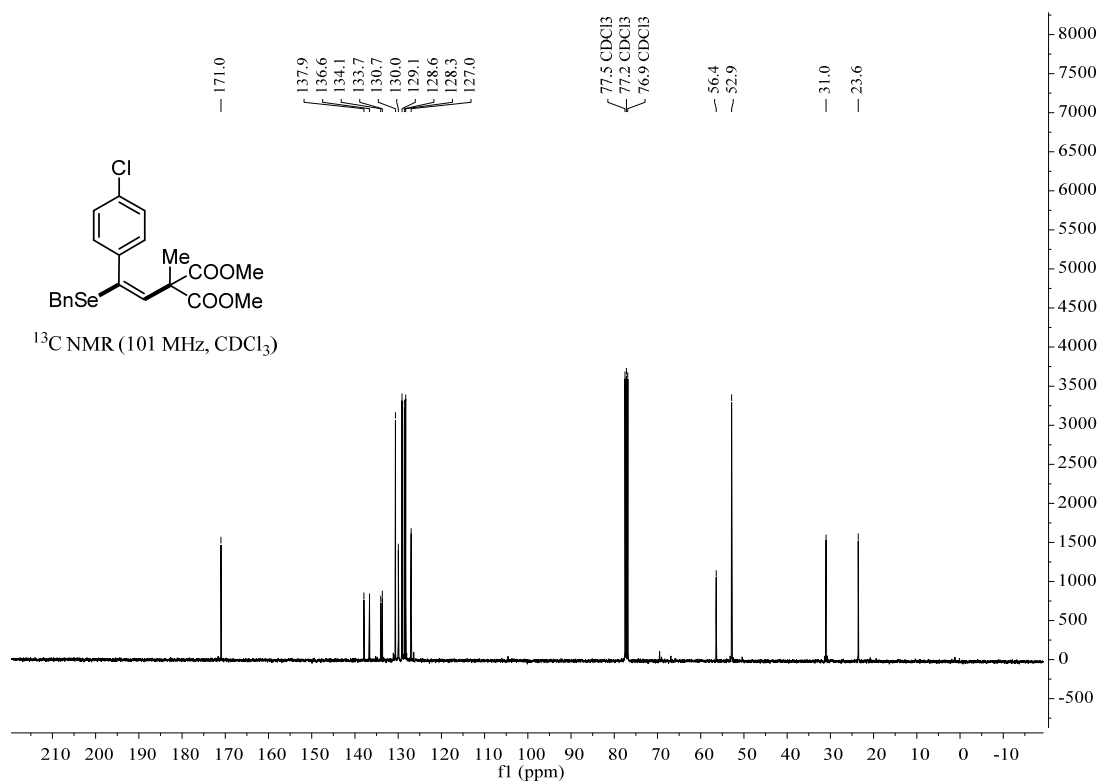

# Compound 38

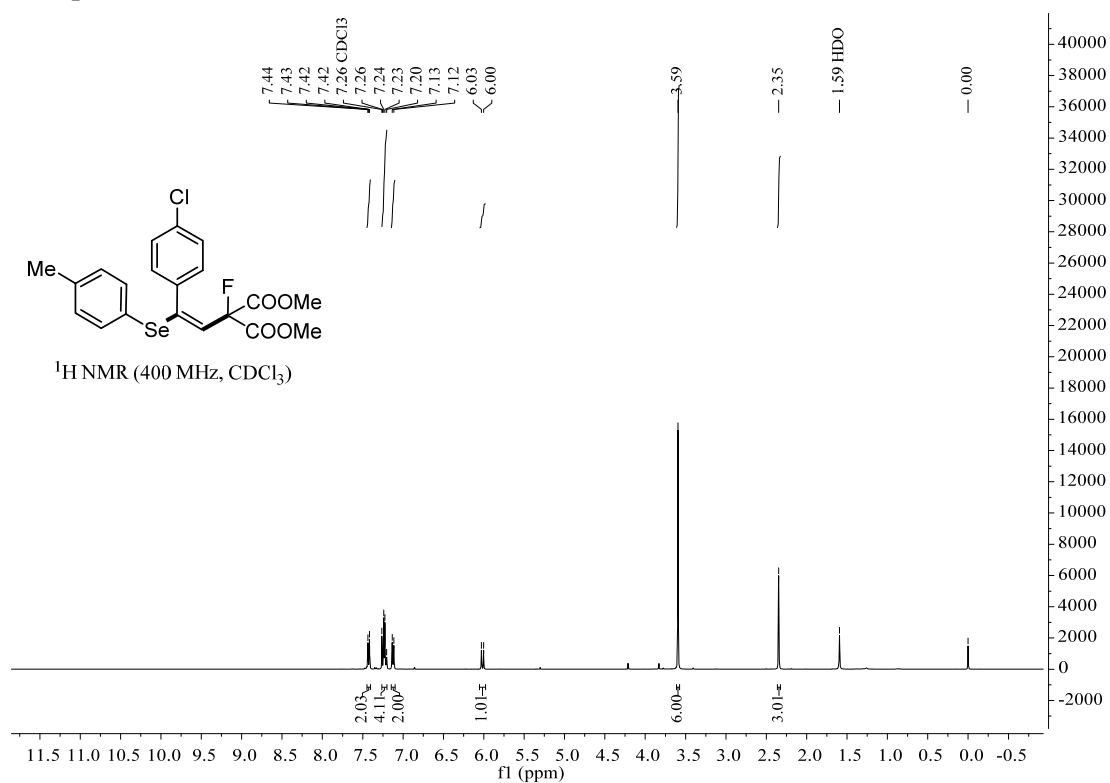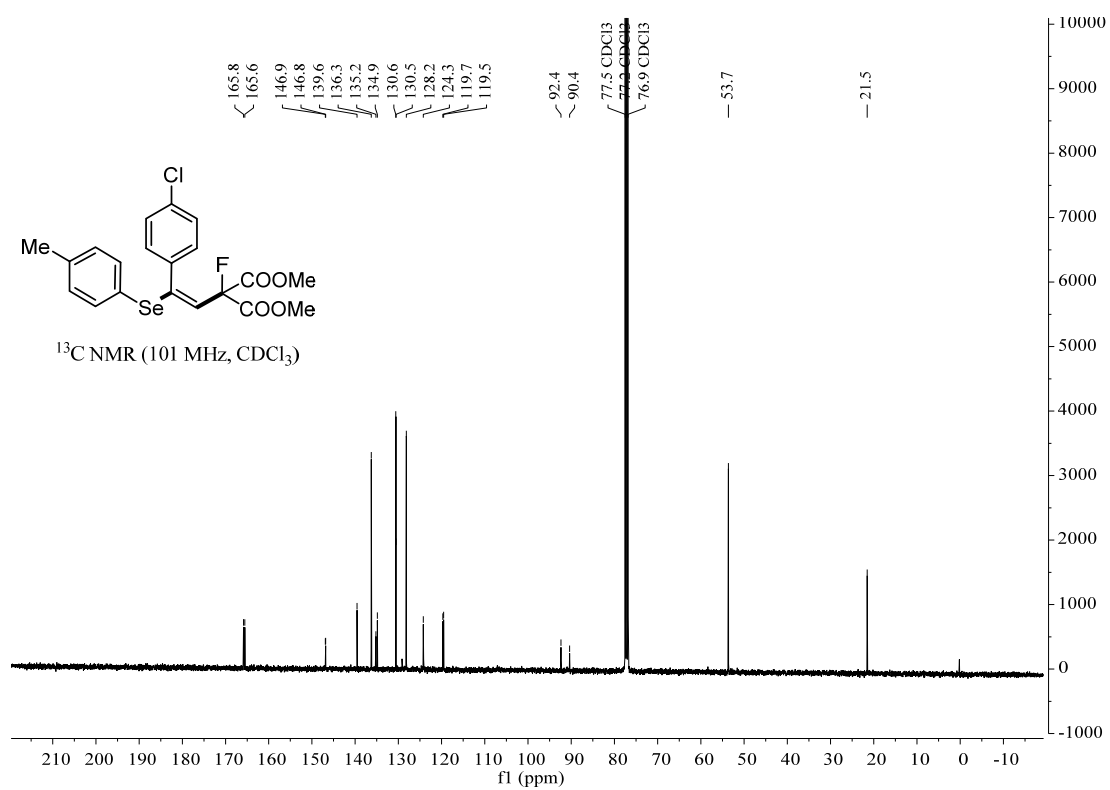

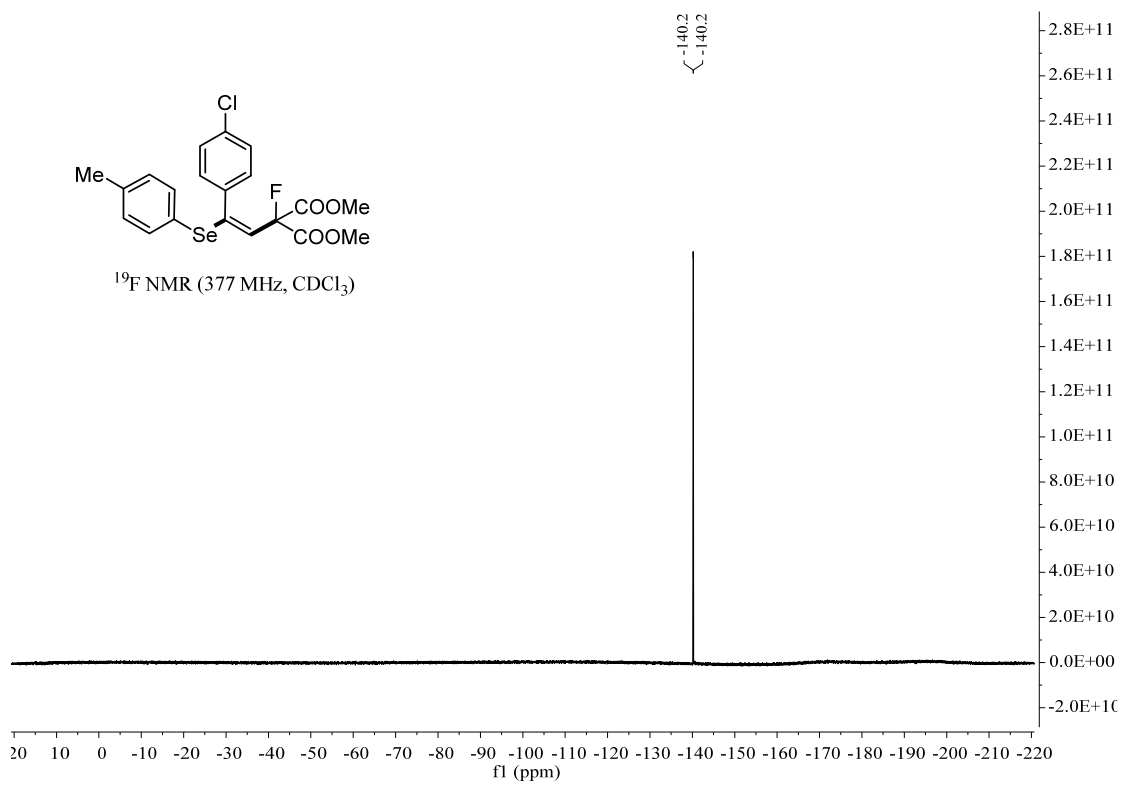

# Compound 39

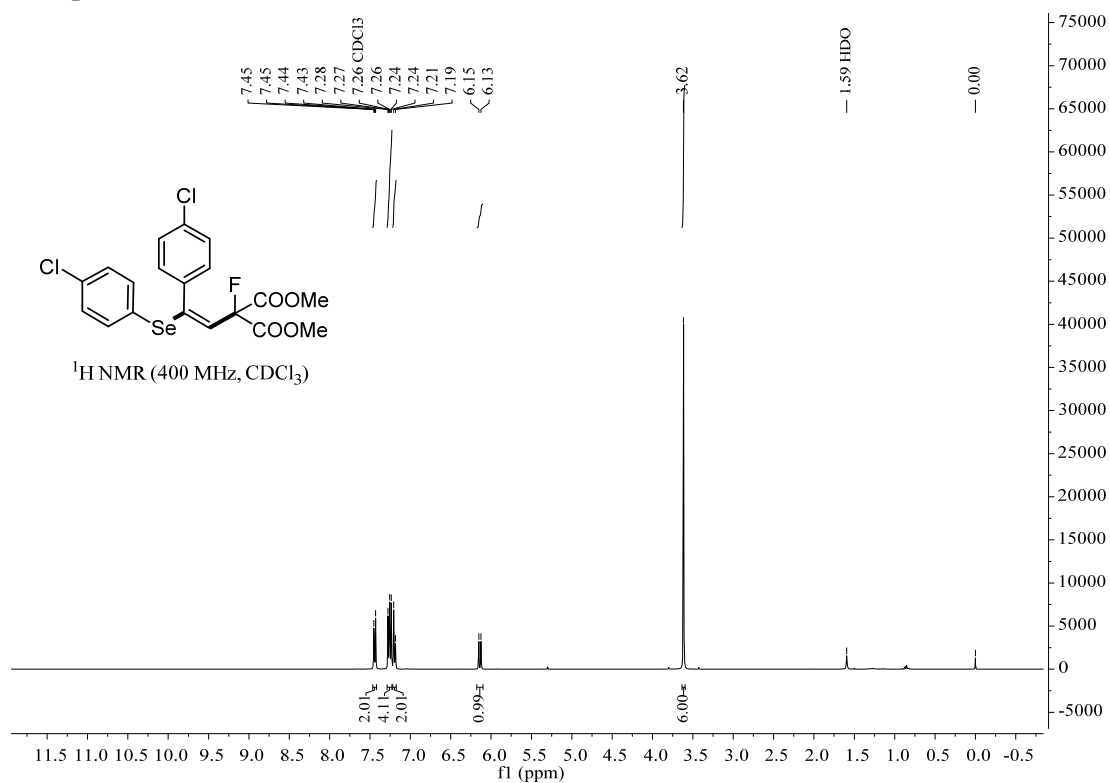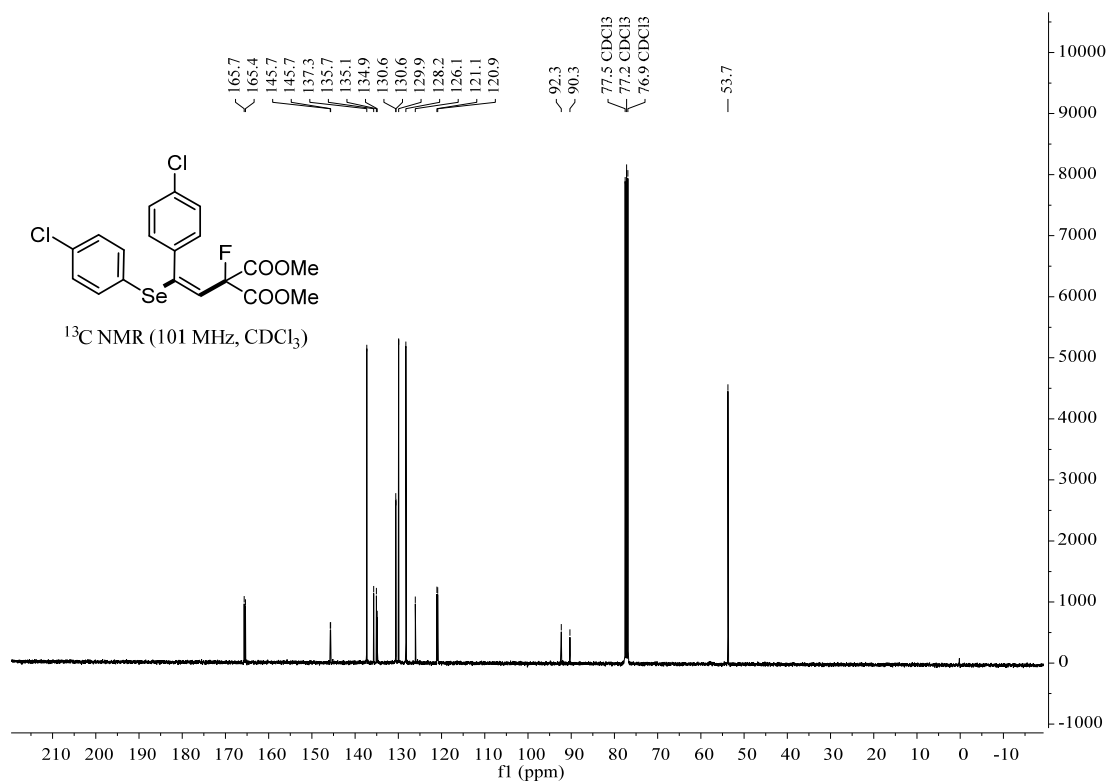

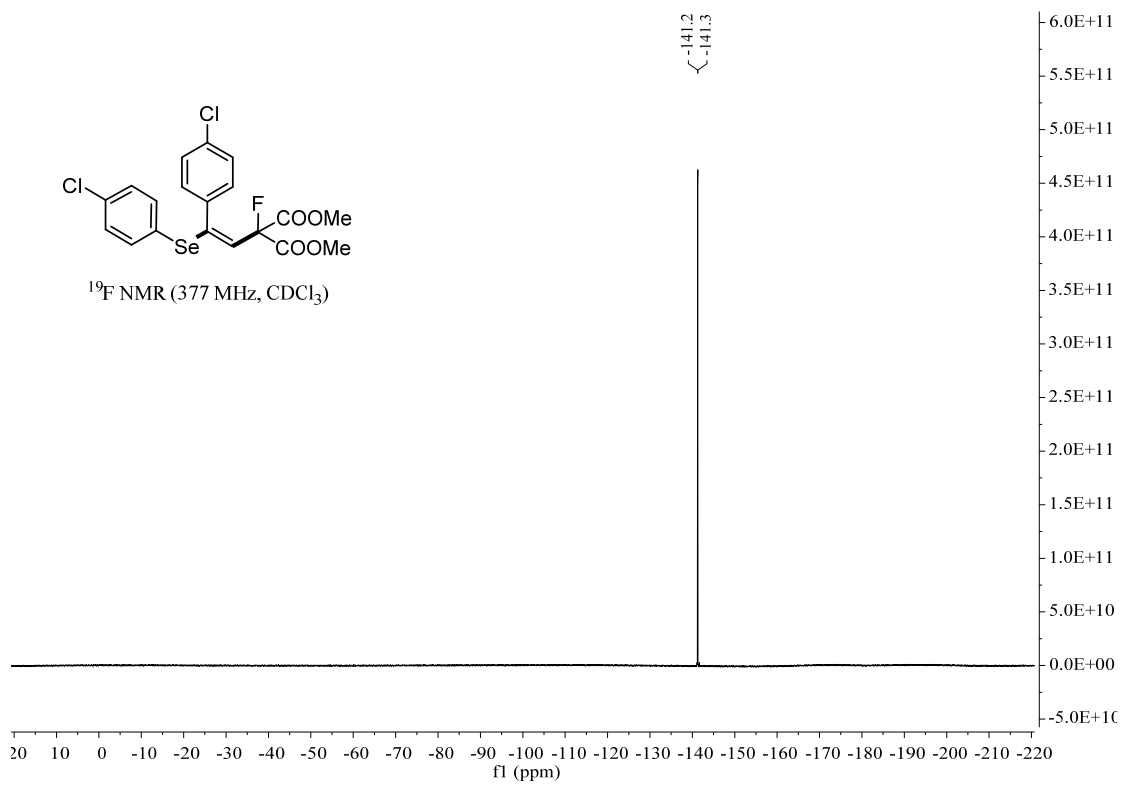

# Compound 40

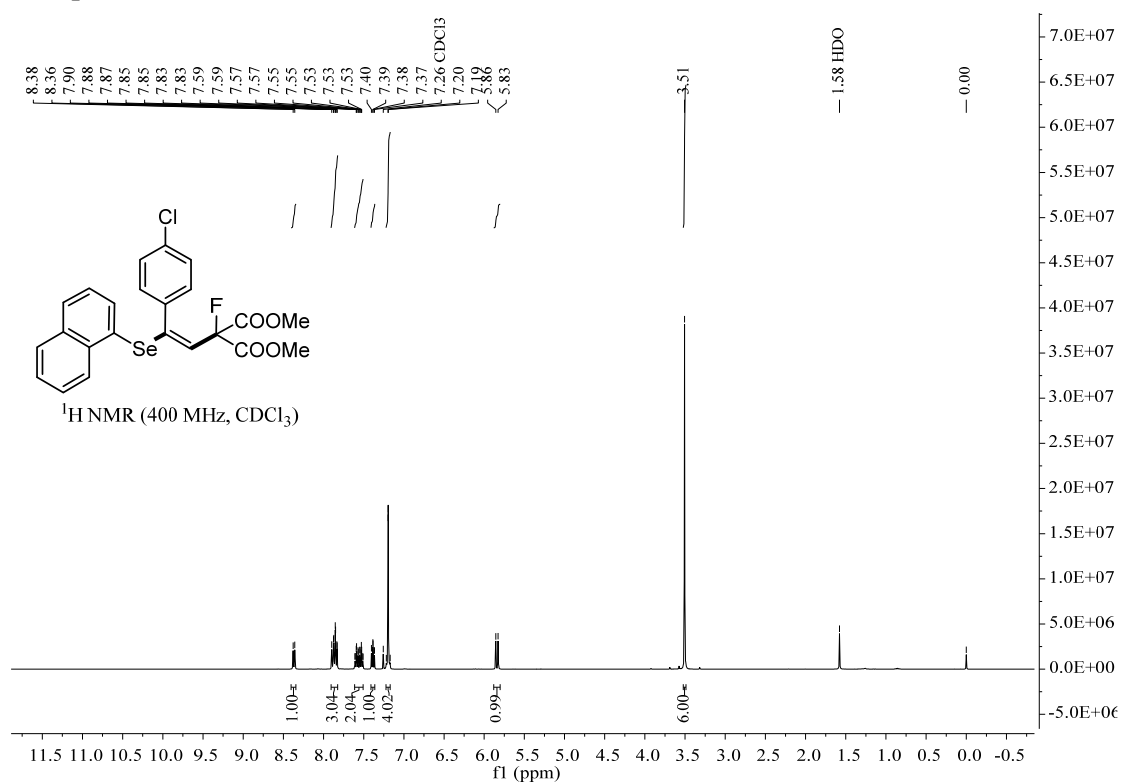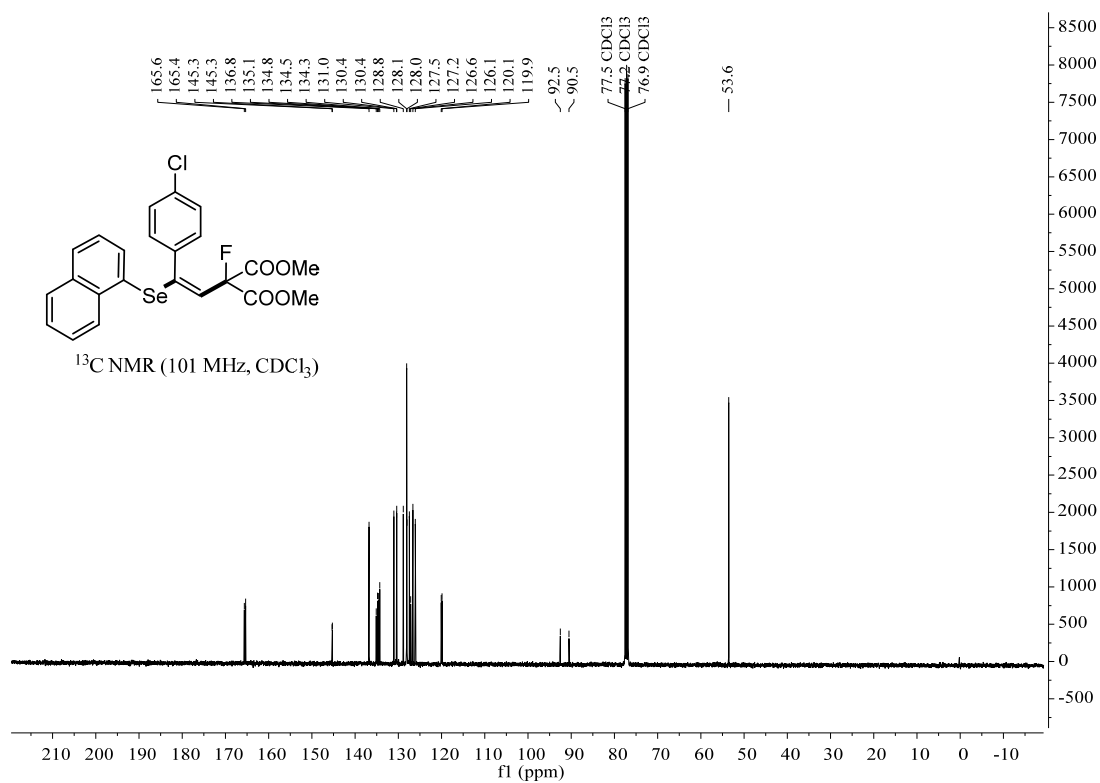

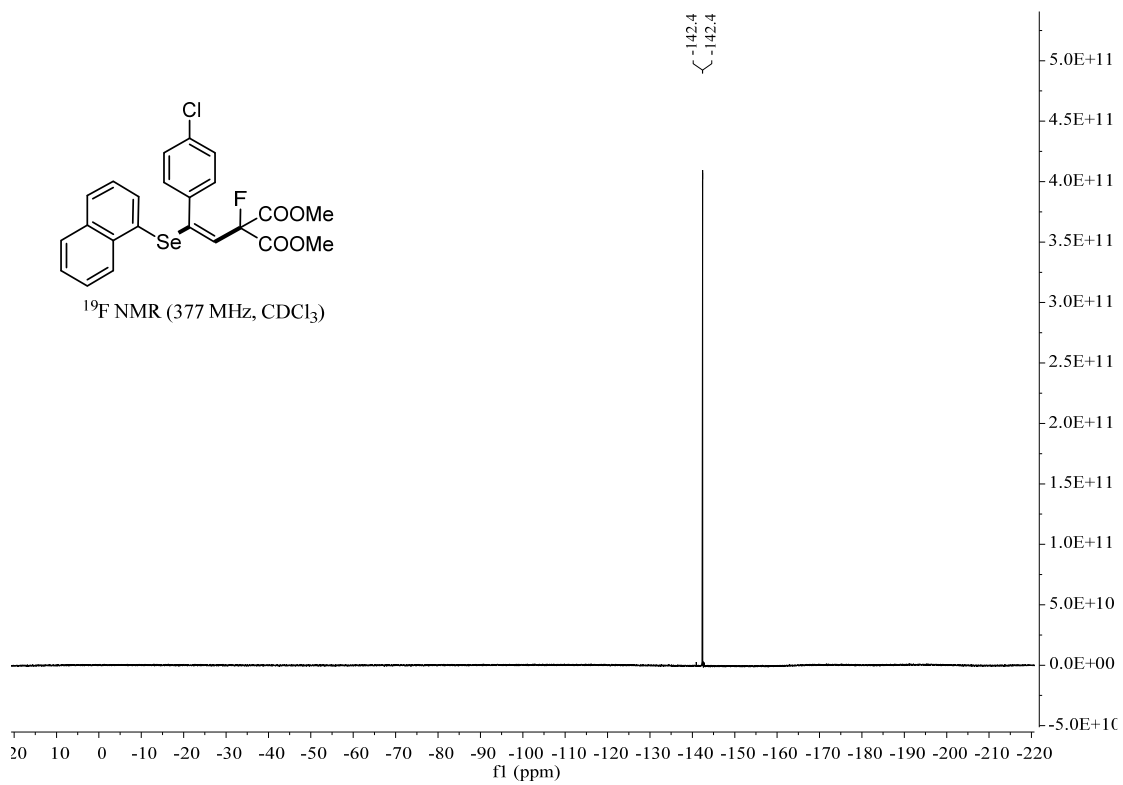



# Compound 41

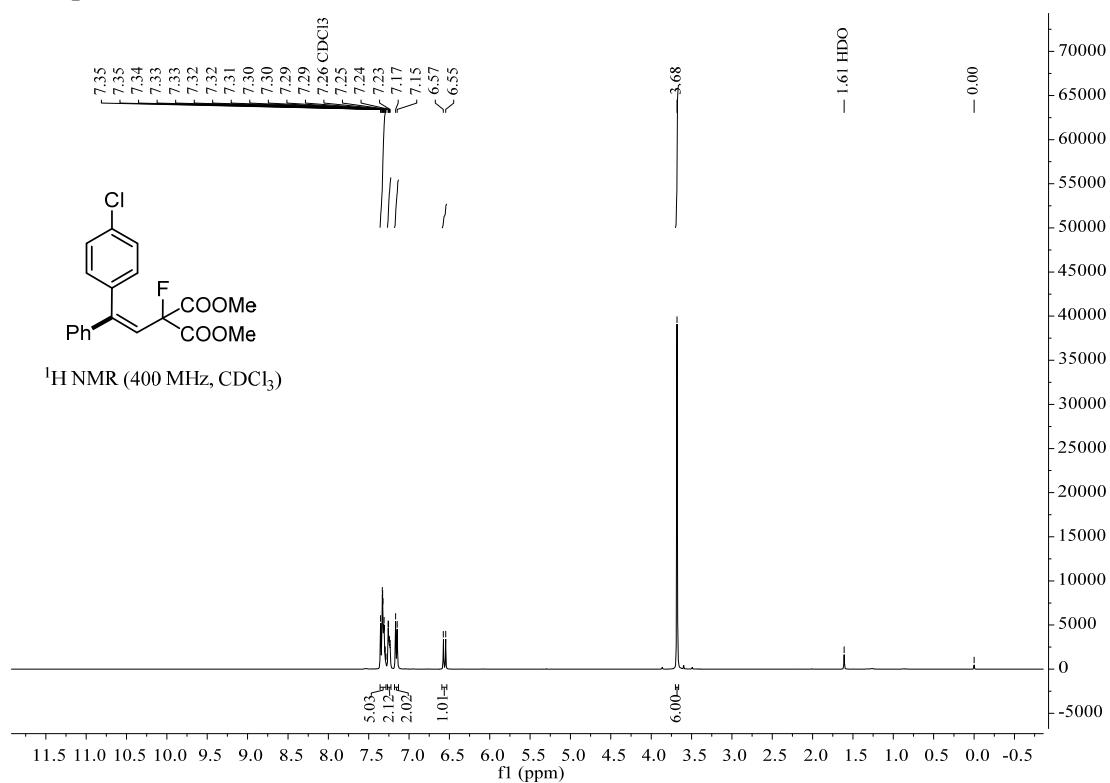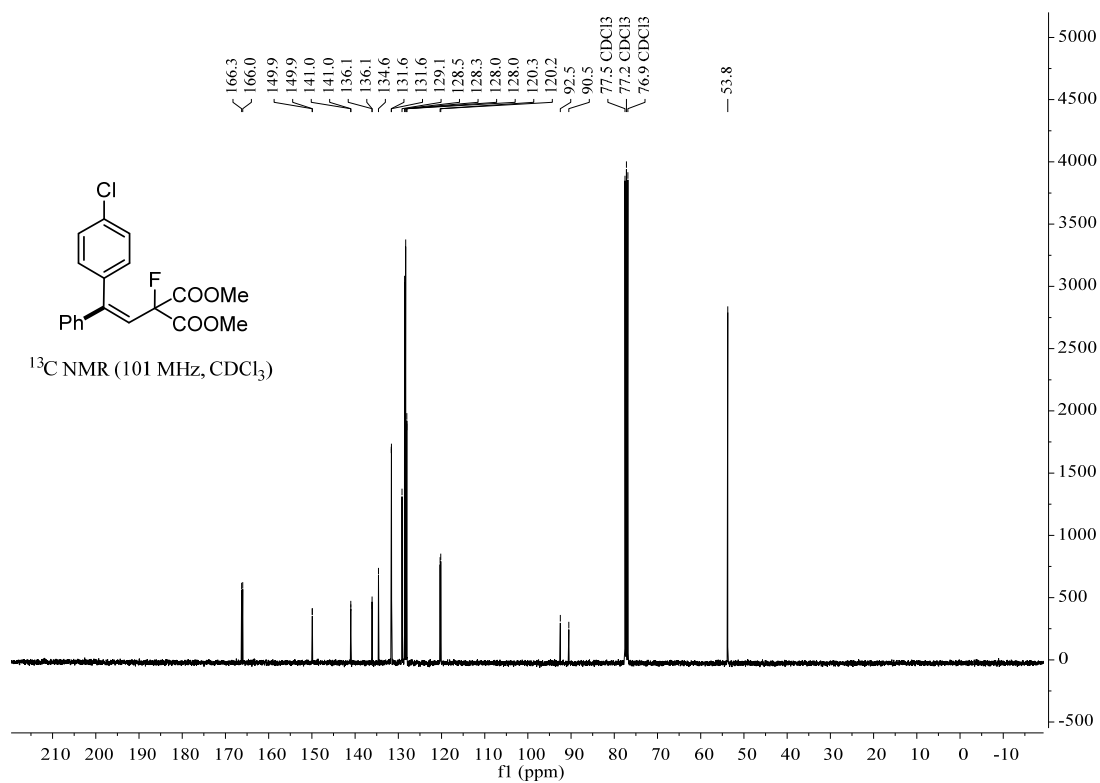

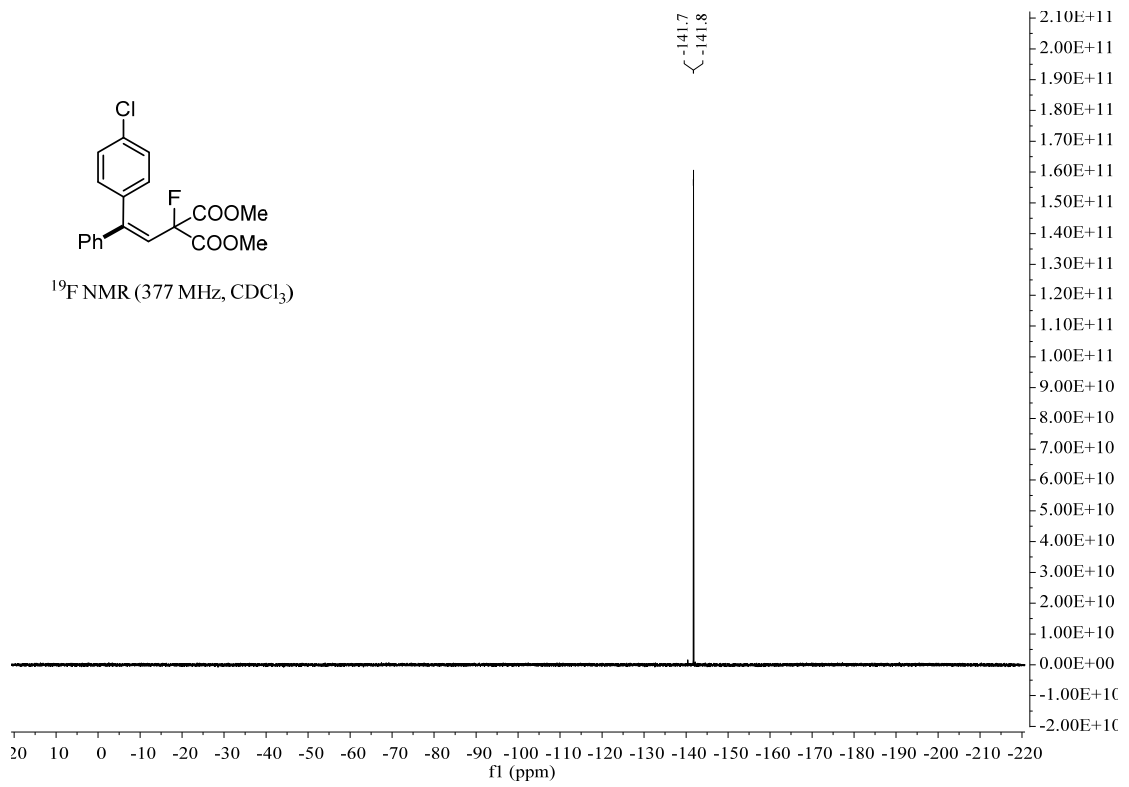

# Compound 43

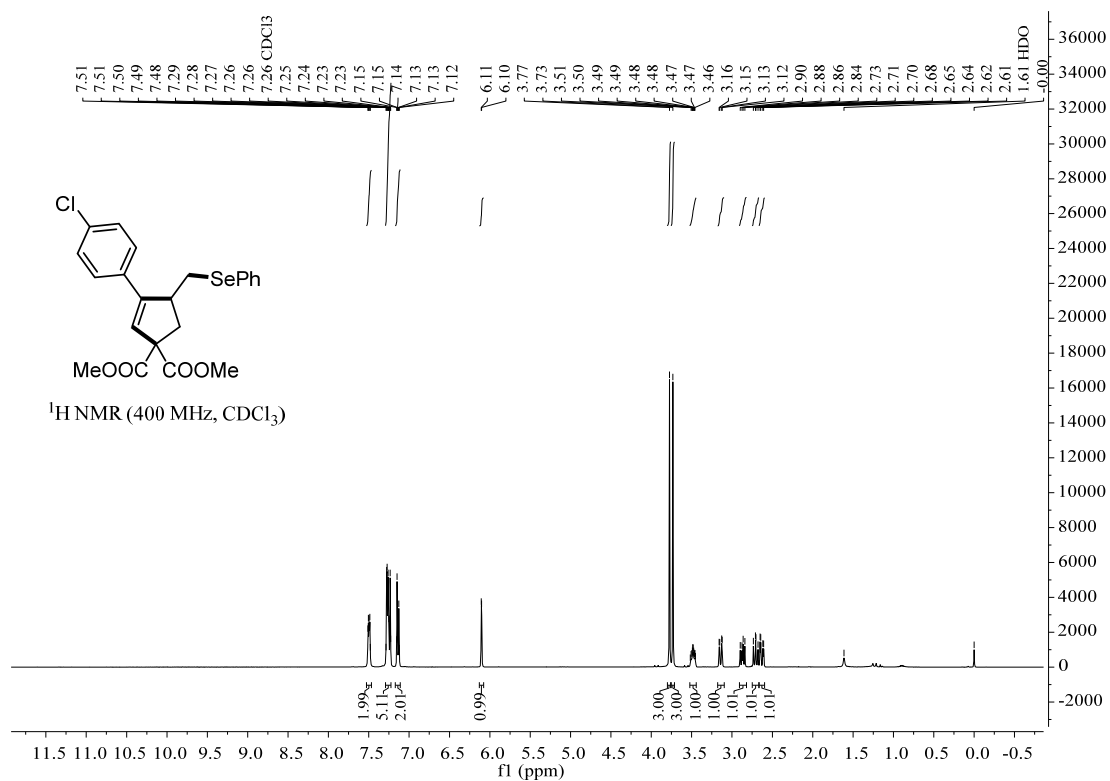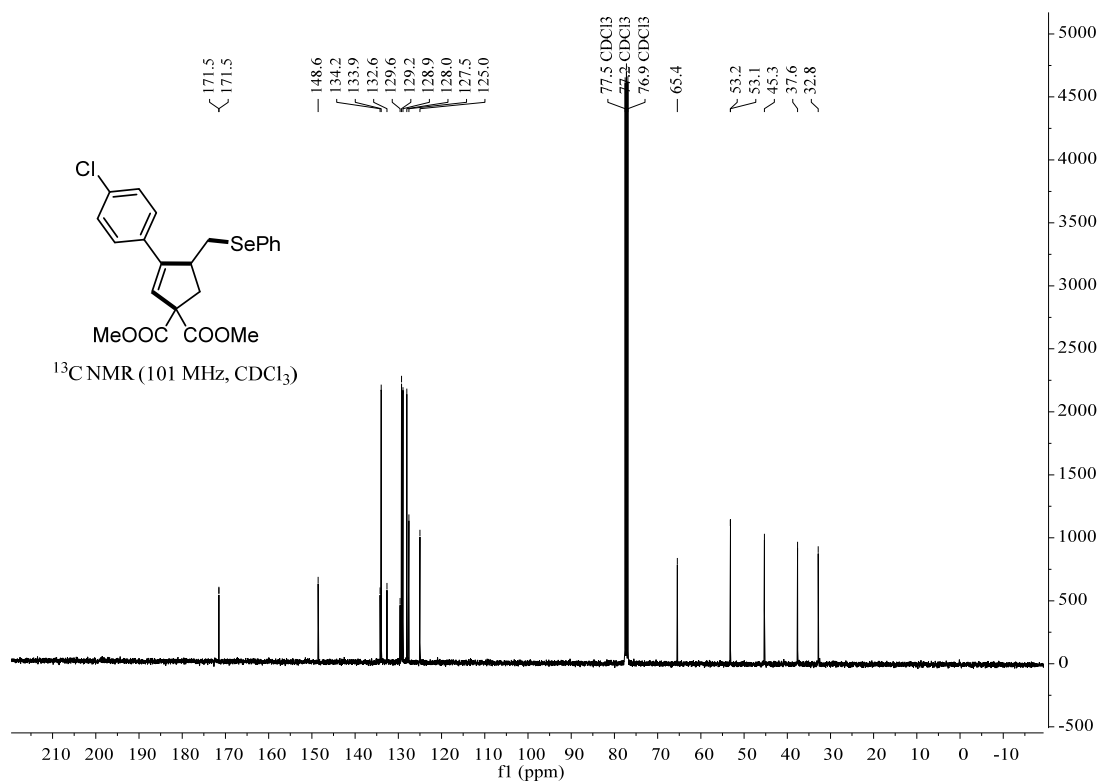

# Compound S1

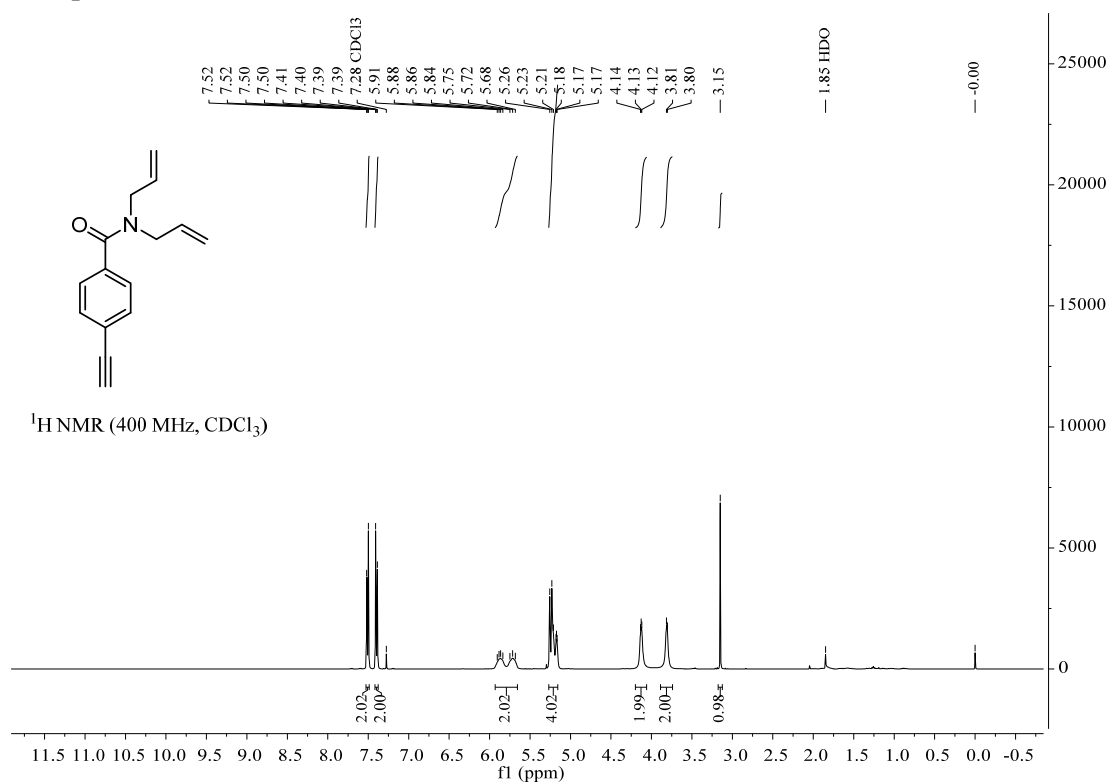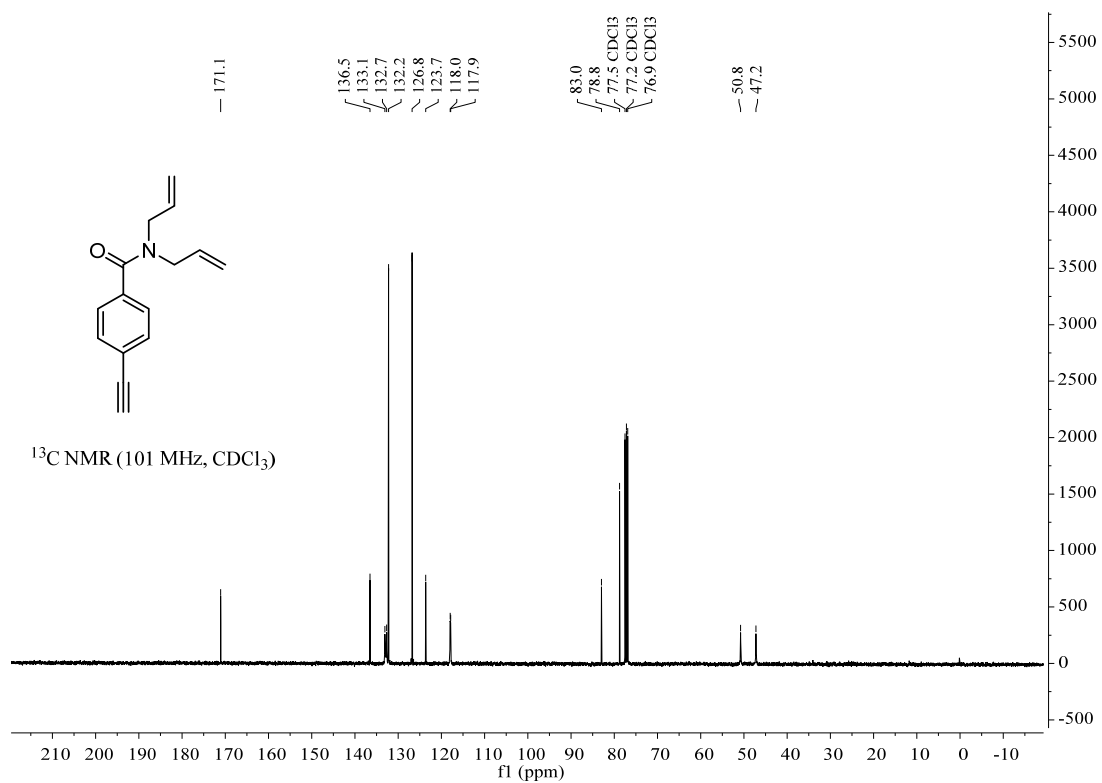

Supplement: d2qo00320a1.pdf [file d2qo00320a1.pdf]
